# 1           **A comprehensive atlas of the aging vertebrate brain reveals** 2           **signatures of progressive proteostasis dysfunction**

3           Domenico Di Fraia<sup>1,\*</sup>, Antonio Marino<sup>1,\*</sup>, Jae Ho Lee<sup>2,\*</sup>, Erika Kelmer Sacramento<sup>1</sup>,  
4           Mario Baumgart<sup>1</sup>, Sara Bagnoli<sup>3</sup>, Pedro Tomaz da Silva<sup>4,5</sup>, Amit Kumar Sahu<sup>1</sup>,  
5           Giacomo Siano<sup>3</sup>, Max Tiessen<sup>1</sup>, Eva Terzibasi-Tozzini<sup>3</sup>, Julien Gagneur<sup>4,6,7</sup>,  
6           Judith Frydman<sup>2,#</sup>, Alessandro Cellerino<sup>1,3,#</sup>, and Alessandro Ori<sup>1,#,\$</sup>

7           <sup>1</sup> Leibniz Institute on Aging - Fritz Lipmann Institute (FLI), Jena, Germany

8           <sup>2</sup> Department of Biology, Stanford University, Stanford, CA, USA

9           <sup>3</sup> BIO@SNS, Scuola Normale Superiore, Pisa, Italy

10          <sup>4</sup>School of Computation, Information and Technology, Technical University of Munich, Garching,  
11          Germany

12          <sup>5</sup> Munich Center for Machine Learning, Munich, Germany

13          <sup>6</sup> Computational Health Center, Helmholtz Center Munich, Neuherberg, Germany

14          <sup>7</sup> Institute of Human Genetics, School of Medicine, Technical University of Munich, Munich, Germany

15

16

17          \* Equal contribution

18          # Correspondence should be address to: [jfrydman@stanford.edu](mailto:jfrydman@stanford.edu) , [alessandro.cellerino@leibniz-flf.de](mailto:alessandro.cellerino@leibniz-flf.de)

19          or [alessandro.ori@leibniz-flf.de](mailto:alessandro.ori@leibniz-flf.de)

20          \$ Lead contact

21

## 22          **ABSTRACT**

23          Protein homeostasis is disrupted in aging and neurodegenerative diseases, yet, the specific  
24          impact of aging on brain proteostasis remains poorly understood. Here, we measured and  
25          integrated the effects of aging on the transcriptome, translome, and multiple layers of the  
26          proteome in the brain of a short-lived killifish. We find that aging causes a decoupling between  
27          transcriptome and proteome. This leads to decreased abundance of proteins enriched in basic  
28          amino acids such as DNA/RNA-binding proteins and increased levels of others, independent  
29          of mRNA changes. Chronic proteasome impairment *in vivo* induces aging signatures in  
30          lysosomes and mitochondria. However, it does not recapitulate the age-related decoupling  
31          between transcripts and proteins. Instead, aberrant translation pausing and ensuing reduced  
32          ribosome availability reprogram the proteome independently of transcription. The age-linked  
33          changes in protein biogenesis likely enhance aggregation and reduce availability of key protein  
34          complexes, thus contributing to proteome dysfunction and aging hallmarks in older brains.

35

36          **Keywords:** brain, aging, proteome, translation, ribosome, proteasome, mitochondria, killifish,  
37          protein aggregation, post-translational modification

38

*Nothobranchius furzeri* - brain aging

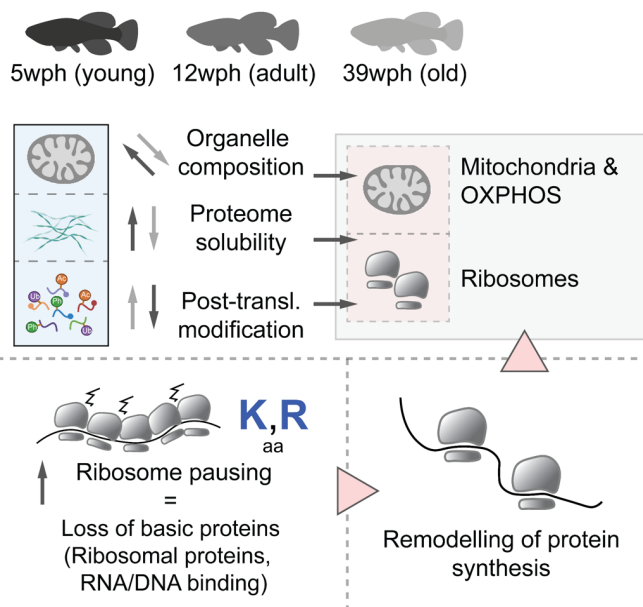

**Highlights:**

- A resource of protein solubility, organelle composition and PTMs in the aging vertebrate brain
- Proteostasis alterations converge on mitochondria, ribosomes and biosynthetic pathways
- Basic proteins, e.g., DNA/RNA binding, are reduced due to translation pausing
- Decreased ribosome availability reprograms protein synthesis in old brains

52

**53 Introduction**

54 Aging is the primary risk factor for most neurodegenerative diseases. Both aging and  
 55 neurodegeneration are characterized by a disruption in protein homeostasis, also known as  
 56 proteostasis, which ultimately leads to the progressive accumulation of protein aggregates.  
 57 Proteostasis involves multiple mechanisms that maintain a balanced and functional proteome.  
 58 These mechanisms include the regulated coordination of protein synthesis and degradation,  
 59 as well as correct protein localization within cells, and fine-tuning of their function through post-  
 60 translational modifications (PTMs). Preserving proteostasis is essential to ensure that an  
 61 adequate supply of protein building blocks is available for assembling cellular structures such  
 62 as multi-protein complexes and organelles. Additionally, it also prevents the accumulation of  
 63 misfolded and "orphan" protein complex subunits that are susceptible to aggregation.

64  
 65 Several possible mechanisms are suggested to contribute to age-related proteostasis  
 66 impairment in the brain (J. Labbadia and Morimoto 2015; Hipp, Kasturi, and Hartl 2019) For  
 67 example, age-dependent enhanced ribosome collisions and stalling have been identified in  
 68 old yeast cells and nematodes as leading to a decline in proteostasis through overwhelmed  
 69 quality control pathways and increased aggregation (Stein et al. 2022). Age-dependent  
 70 changes in protein synthesis have also been observed in rodents and other organs beyond  
 71 the brain (Anisimova et al. 2020; Kluever et al. 2022; Ori et al. 2015). Further, accumulation  
 72 of ribosomes at isolated 3'-UTR has been observed in mouse and human aging brains  
 73 (Sudmant et al. 2018). On the other side, a decline in protein clearance pathways is also  
 74 implicated in aging phenotypes (Vilchez, Saez, and Dillin 2014; Hansen, Rubinsztein, and  
 75 Walker 2018). For instance, a partial decrease of proteasome activity, an early event during  
 76 brain aging, can contribute to the loss of stoichiometry of the ribosome and other protein  
 77 complexes (Kelmer Sacramento et al. 2020). Also, increased activity of deubiquitinating  
 78 enzymes leads to the accumulation of a subset of proteins that can influence lifespan in  
 79 nematodes (Koyuncu et al. 2021).

80 Although all these individual studies have documented changes in specific aspects of the  
81 transcriptome and proteome during aging, as well as age-dependent alterations in aggregation  
82 and post-translational modification, a comprehensive and coordinated analysis of these  
83 changes is currently lacking.

84  
85 Understanding and integrating the impairment of proteostasis in the aging vertebrate brain is  
86 particularly relevant for human neurodegenerative diseases. We reason that to comprehend  
87 the mechanisms of proteostasis decline and its connections to other hallmarks of aging  
88 requires an integrative analysis. This should comprise the integration of several aspects of  
89 proteostasis in aging as well as their interplay and mechanistic relationships. To bridge the  
90 knowledge gap arising from the separate investigation of these aspects in different model  
91 systems, we conducted a comprehensive investigation of proteostasis in the aging brain of  
92 the short-lived killifish *Nothobranchius furzeri*. We chose killifish because of the spontaneous  
93 emergence of aging brain phenotypes, including cognitive decline (Valenzano et al. 2006),  
94 neuronal loss (S. Bagnoli et al. 2022), accumulation of protein aggregates (Matsui, Kenmochi,  
95 and Namikawa 2019), reduced proteasome activity (Kelmer Sacramento et al. 2020),  
96 aggregation of prion-like proteins (Harel et al. 2022), and mis-localization and aggregation of  
97 disease-relevant proteins, such as the RNA-binding protein TDP-43 (Louka et al. 2022).

98  
99 Using this model system, we integrated biochemical and omics techniques to systematically  
100 measure the effects of aging on the transcriptome, translome, and multiple layers of the  
101 proteome and applied computational approaches to investigate the relationships between  
102 these different aspects. We established a protocol for long-term partial inhibition of  
103 proteasome activity to investigate whether this specific perturbation of proteostasis is sufficient  
104 to replicate age-related brain phenotypes *in vivo*. Finally, we performed Ribo-Seq to directly  
105 assess the contribution of mRNA translation to proteome alterations and to quantify ribosome  
106 stalling and pausing in the aging vertebrate brain. Our analyses provide a compelling  
107 hypothesis to explain the lack of correspondence between transcriptome and proteome  
108 changes, an evolutionary conserved (Janssens et al. 2015; Wei et al. 2015; Walther et al.  
109 2015; David et al. 2010; Takemon et al. 2021; Gerdes Gyuricza et al. 2022; Kelmer  
110 Sacramento et al. 2020), yet understudied aspect of age-related proteostasis impairment that  
111 has been linked to neurodegeneration in humans (Dick et al. 2023). We demonstrate that age-  
112 dependent translation dysfunction, leading to aberrant elongation pausing and increased  
113 aggregation can account for age-related alterations of the proteome independently of changes  
114 in mRNA levels.

115

116

117

118

119

120

121

## 122 Results

### 123 Multi-layer characterization of proteome alterations in the killifish 124 aging brain

125 Aging can influence different aspects of protein homeostasis. To obtain an unbiased  
126 characterization of the effect of aging on the brain proteome we employed a multi-layered  
127 approach to interrogate major modes of protein regulation. We generated datasets describing  
128 changes in protein and mRNA levels, protein subcellular localization, detergent insolubility,  
129 and post-translational modifications (PTMs) in the aging brain of killifish (Figure 1A and S1A).  
130 First, we captured proteome-wide variation in subcellular localization using an approach based  
131 on differential centrifugation coupled with quantitative mass spectrometry (LOPIT-DC)  
132 (Geladaki et al. 2019) and analyzed pools of adult (12 weeks post-hatching = wph) and old  
133 (39 wph) killifish brains (Figure S1B, Table S1). We used a list of well-annotated organelle  
134 markers (Gatto, Breckels, and Lilley 2019) to evaluate organelle separation by LOPIT-DC  
135 (Figure 1B and S1C, D) and to confirm the reproducibility of organelles sedimentation between  
136 adult and old brains (Figure S1E). We then employed a tailored statistical approach (see  
137 methods, Figure S1F) to identify age-dependent changes in protein sedimentation profiles  
138 (Figure 1C, Table S1). The most prominent changes affected multiple mitochondrial and  
139 lysosomal proteins among others, including the mitochondrial transporters SLC25A32 and  
140 SLC25A18, and the lysosomal and vesicle trafficking proteins RAB14 and CCZ1 (Figure 1D).  
141 We interpret these alterations of sedimentation as an indication of partial reorganization of the  
142 mitochondrial and lysosomal proteome during aging that correlates with the well-described  
143 dysfunction of these organelles during aging and neurodegenerative diseases.

144  
145 In parallel, we used the same pools of samples to assess age-dependent changes in protein  
146 solubility. We complemented our previous analysis of SDS insoluble aggregates in the killifish  
147 aging brain (Kelmer Sacramento et al. 2020) with a more fine-grained analysis of protein  
148 solubility. Thus, we exposed brain homogenates to a series of detergent combinations of  
149 increasing strength, separated soluble and insoluble fractions by ultracentrifugation (as  
150 described in (Tebbenkamp and Borchelt 2009), Figure S2A, Table S1), and quantified protein  
151 abundances across fractions using mass spectrometry. Principal component analysis showed  
152 reproducible detergent-based fractionation in adult and old brains (Figure S2B) and GO  
153 enrichment analysis confirmed the expected partitioning of cellular components as a function  
154 of detergent strength (Figure S2C and S2D). In agreement with previous findings from other  
155 species (Vecchi et al. 2020; Walther et al. 2015) and the spontaneous age-related  
156 accumulation of protein aggregates in killifish brain (Matsui, Kenmochi, and Namikawa 2019;  
157 Harel et al. 2022; Kelmer Sacramento et al. 2020), we observed an overall increase of protein  
158 detergent-insolubility in old samples (Figure S2E). By comparing detergent insolubility profiles  
159 between adult and old brains (Figure S2F-G), we identified 410 protein groups changing  
160 detergent insolubility with aging (Figure 1E, Table S1). While many of these proteins exhibited  
161 increased insolubility to detergents in old brains, there were instances where aging was linked  
162 to decreased insolubility to detergents. This indicates that factors other than protein  
163 aggregation, such as alterations in protein interactions or localization, could be responsible for  
164 the observed changes in detergent insolubility.

165  
166 Next, we examined the effects of brain aging on multiple PTMs, using a sequential enrichment  
167 strategy followed by quantification of age-dependent changes in protein ubiquitylation,

168 acetylation, and phosphorylation in the aging brain (Figure S3A, Table S2). We quantified  
169 PTM-carrying peptides normalized for protein changes (see methods, Figure S3) and  
170 identified age-related changes for 534 phosphorylated, 618 ubiquitylated, and 190 acetylated  
171 peptides ( $P < 0.05$ , Figure 1F). The general increase in the number of affected PTM peptides  
172 with aging emphasized its overall impact on the proteome beyond protein abundance (Figure  
173 1F-G). Integration of phosphorylation data with experimentally derived kinase-substrate  
174 relationships (Johnson et al. 2023) indicates a remodeling of kinase signaling in the aging  
175 brain. Besides an increased activity (i.e., increased phosphorylation of predicted targets) for  
176 kinases involved in the regulation of immune responses, we reported enhanced activity for  
177 kinases of the protein kinase C family, e.g., PKN1, PKN2, PKCA, whose hyperactivation is  
178 linked to Alzheimer's disease (Alfonso et al. 2016; Morshed et al. 2021; Bai et al. 2020). Our  
179 data also reveals the decreased activity of kinases responsible for the phosphorylation of  
180 splicing factors and other RNA processing proteins, e.g. CDC2-like kinases 2 and 4 (CLK2  
181 and CLK4, Figure 1H-I). These data suggest a convergence between aging and  
182 neurodegeneration concerning altered signaling pathways in the brain and hints at  
183 dysfunctional RNA processing in the aging brain.

184  
185 To more systematically investigate the convergence between brain aging and  
186 neurodegenerative diseases, we queried our datasets for killifish orthologs of proteins  
187 encoded by genes that have been genetically linked to neurodegeneration in humans (Table  
188 S3). We found several of these proteins to be affected by aging in killifish in at least one of the  
189 proteomic datasets analyzed (Figure 1J). These include changes in subcellular fractionation  
190 and detergent insolubility (Figure S4A-B), as well as 23 PTM sites conserved between killifish  
191 and humans (Figure S4C-D-E). The microtubule-associated protein Tau (MAPT) was notably  
192 affected by aging across multiple proteomic layers. MAPT showed a prominent increase in  
193 detergent insolubility in old brains (Figure 1E), an alteration associated with human aging and  
194 neurodegenerative diseases (Guillozet et al. 2003; Chatterjee et al. 2023; Wang and  
195 Mandelkow 2015). Additionally, we detected an age-dependent increase in phosphorylation  
196 and ubiquitylation of conserved residues in the microtubule-binding domain (MBD) of MAPT,  
197 a region sensitive to PTMs and associated with Tau pathological aggregation (Figure 1K and  
198 S4D) (L. Li et al. 2022; Datta et al. 2021; Wang and Mandelkow 2015). We validated the  
199 spontaneous increase of MAPT/Tau phosphorylation in old killifish brains using  
200 immunofluorescence staining for a conserved phosphorylated epitope of Tau (AT100) (Figure  
201 1L).

202  
203 Together, our analyses comprehensively establish how aging affects the brain proteome along  
204 multiple axes beyond protein abundance, using a consistent model organism and age groups.  
205 This thorough characterization of the proteome reveals several potential connections between  
206 aging, specific molecular events, and genetic factors associated with neurodegeneration,  
207 which are relevant to humans. To make this resource easily accessible to the scientific  
208 community, we have developed a web application at [https://genome.leibniz-  
209 fli.de/shiny/orilab/notho-brain-atlas/](https://genome.leibniz-fli.de/shiny/orilab/notho-brain-atlas/) (credentials will be available after final publication)

210

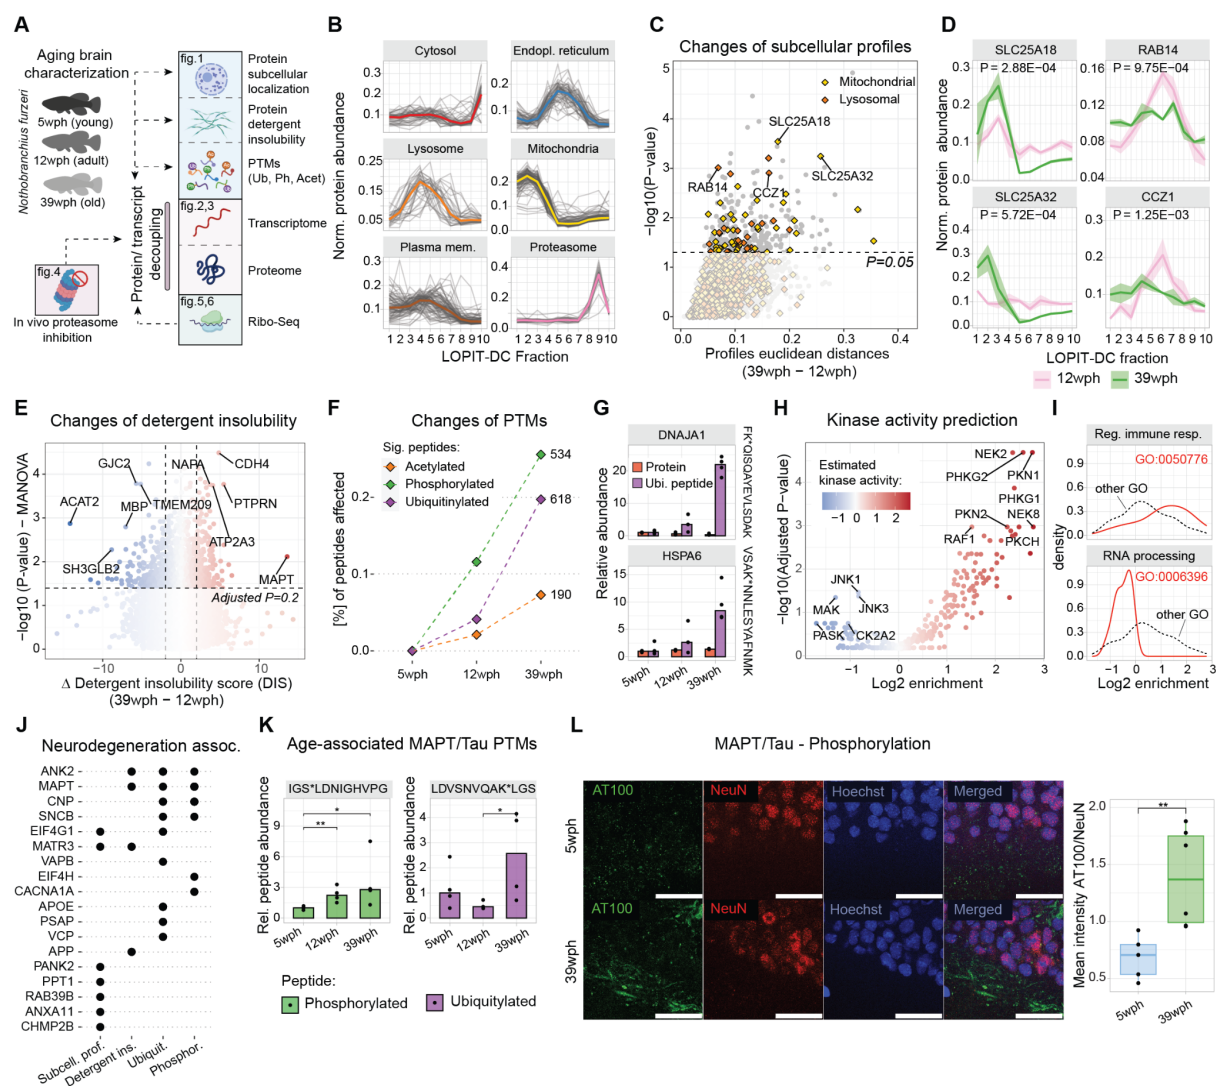

211

212 **Figure 1: Aging affects protein subcellular localization, detergent insolubility and post-translational**  
 213 **modifications.** A) Overview of the datasets generated in this study (wph= weeks post-hatching). B) Organellar  
 214 markers protein profiles from LOPIT-DC (12 wph). The x-axis indicates the different fractions of the LOPIT-DC  
 215 experiment. The y-axis indicates protein distribution across fractions. The median profiles of each organelle are  
 216 highlighted by a colored solid line. C) Scatterplot depicting protein relocalization scores in the aging killifish brain.  
 217 The x-axis indicates the median replicate Euclidean distance of the profiles between the two conditions. Y-axis  
 218 indicates the  $-\log_{10}$  P-value of the Hotelling T-squared test between adult (12 wph) and old (39 wph) profiles (N=4  
 219 pools per age group). D) Examples of sedimentation profiles for selected proteins with altered subcellular  
 220 fractionation profiles. In each of the plots, the x-axis indicates the 10 fractions obtained from LOPIT-DC. The y-axis  
 221 indicates the total protein distribution along the 10 fractions for adult (12 wph, pink) and old (39 wph, green) fish.  
 222 Shaded areas indicate 50% of the replicate distribution. P-values indicate the results of the Hotelling T2 test (N=4  
 223 pools per age group). E) Volcano plot depicting protein detergent insolubility changes in the aging killifish brain.  
 224 The x-axis indicates the difference in detergent insolubility score (see methods) expressed as old vs. adult. Higher  
 225 values indicate increased detergent insolubility in the old brain. Y-axis indicates the  $-\log_{10}$  of the MANOVA test  
 226 between adult and old profiles (N=4 pools per age group). Significant changes are highlighted by dashed lines  
 227 (MANOVA adjusted  $P=0.2$  and absolute  $\Delta$  Detergent insolubility score  $>2$ ). F) Post-translationally modified peptides  
 228 affected by aging. The y-axis (left) indicates the percentage of affected sites in each dataset when compared to  
 229 the young samples ( $P < 0.05$ , moderated Bayes T-test, N=3-4). G) Barplots showing relative abundances of  
 230 ubiquitylated peptides from DNAJA1 and HSPA6 across age groups (purple bars). The corresponding protein  
 231 abundances are displayed as reference (red bars). On the side is reported the sequence of the identified peptide,  
 232 N=3-4. H) Volcano plot showing changes in estimated kinase activity (using the algorithm from (Johnson et al.  
 233 2023)) based on phosphoproteomics data from old (39 wph) vs. young (5 wph) fish brains. The x-axis indicates  
 234 changes in estimated kinase activity. The y-axis indicates FDR corrected  $-\log_{10}(P\text{-value, Fisher's test})$ . I) Density

235 distribution for kinases involved in the regulation of immune response (GO:0050776, upper panel) and RNA  
236 processing (GO:0006396, lower panel) against all other kinases from panel H. x-axis indicates the log<sub>2</sub> Kinase  
237 activity enrichment value. J) Heatmap showing alterations of proteins linked to neurodegenerative diseases.  
238 Significant alterations in each dataset ( $P < 0.05$ ) are marked by black dots. K) Barplots displaying significantly  
239 changing ( $P < 0.05$ , moderated Bayes T-test) MAPT/Tau phosphorylated (green) and ubiquitylated (purple) peptide.  
240 The values represent relative abundances to the young (5 wph) age group after correction for protein changes (see  
241 methods, Figure S3B). Asterisks indicate the P-value of the moderated Bayes T-test ( $N=3-4$ ). L) (Left panel)  
242 Immunofluorescence stainings for phosphorylated (AT100) Tau in brain cryo-sections of young and old  
243 *Nothobranchius furzeri*. The stainings were normalized over the amount of NeuN in order to account for the different  
244 amounts of neuronal cells between young and old ( $N=5$ ) animals. Scale bars = 20 $\mu$ m. (Right panel) Boxplot  
245 representation of mean intensity for phosphorylated Tau normalized over the amount of NeuN. The p-value  
246 indicates the results of a two-sample Wilcoxon test. \* $P \leq 0.05$ ; \*\* $P \leq 0.01$ , \*\*\* $P \leq 0.001$ , \*\*\*\* $P \leq 0.0001$ . Related  
247 to Figure S1,S2,S3,S4 and Table S1,S2,S3.

248

## 249 **Loss of basic proteins independently of transcription is a feature of** 250 **the aging brain**

251 We utilized our extensive datasets to investigate the mechanisms driving age-related changes  
252 in proteostasis. One intriguing hallmark of an aging brain, whose mechanisms are poorly  
253 characterized, is the loss of correlation between changes in gene transcripts (mRNA) and  
254 corresponding protein changes, a phenomenon known as "decoupling". The widespread  
255 occurrence of decoupling during aging across species suggests that it may be an important  
256 contributor to proteome dysfunction with age. To further investigate this aspect and how it  
257 might be connected to other proteome alterations, we combined our datasets with  
258 quantification of age-related changes in gene transcripts and protein levels which we obtained  
259 from proteomics and RNA sequencing (RNAseq) data (Figure 2A-B and S5A-H). By fitting a  
260 null distribution on the measured differences between protein and transcript changes, which  
261 we refer to as "decoupling score", we identified subsets of proteins displaying "positive protein-  
262 transcript decoupling", i.e., protein level higher than expected from changes of its  
263 corresponding transcript, or "negative protein-transcript decoupling", i.e., protein level lower  
264 than expected from changes of its corresponding transcript (Figure 2B and 2C, Table S4).

265 The decoupling scores displayed a median shift towards negative values (Figure 2C) due to  
266 an overall skew towards negative fold changes at the proteome level (Figure S5D), which was  
267 independent of sample normalization (Figure S5C). To assess the reproducibility of the  
268 decoupling metric, we compared the decoupling scores of this study to the decoupling scores  
269 of an independent transcriptome and proteome aging brain dataset that we previously  
270 generated (Kelmer Sacramento et al. 2020). Supporting our observations, there was a  
271 significant positive correlation between these datasets (Figure S5I), despite technical  
272 differences in the quantitative proteomics workflows: tandem-mass tags (TMT) based  
273 quantification (Kelmer Sacramento et al. 2020) compared to label-free Data Independent  
274 Acquisition (DIA, this study).

275 We then applied a multiple linear regression model to interrogate the association between the  
276 measured decoupling scores (response variable,  $N=1188$  complete observation) and distinct  
277 biophysical properties of transcripts and proteins ( $N=9$  features). Our model explained 31% of  
278 the decoupling variance (Adjusted  $R^2 = 0.31$ , Figure 2D). We detected estimated protein  
279 absolute abundance (see methods,  $\beta=0.36$ ,  $P < 2.20E-16$ ) and protein half-life (as described  
280 in (Fornasiero et al. 2018),  $\beta=0.31$ ,  $P < 2.20E-16$ ) as the parameters with the highest

281 correlation with positive decoupling (higher protein levels than expected from transcript  
282 changes, Figure 2E). On the other hand, the parameters with the highest correlation with  
283 negative decoupling (i.e. lower protein levels than expected from transcript changes) were  
284 relative transcript abundance (expressed as log<sub>2</sub> transcripts per million (TPM)  $\beta=-0.26$ ,  $P <$   
285  $2.20E-16$ ) and proportion of basic amino acids ( $\beta=-0.13$ ,  $P = 4.30E-03$ , Figure 2D and 2E).  
286 We subsequently employed a second regression model, with protein amino acid composition  
287 as the sole predictor variable. Our analysis revealed significant correlations between negative  
288 decoupling and the content of lysine, proline, glutamine, and arginine (Figure 2F). These  
289 findings reveal that basic amino acid content has a significant aggregated impact on  
290 “negative” decoupling with aging, i.e. the loss of protein levels relative to mRNA.

291 Since higher content of basic amino acids is a known feature of nucleic acid binding proteins.  
292 Therefore, we investigated the age-dependent behavior of proteins involved in DNA repair and  
293 experimentally defined RNA-binding proteins (Caudron-Herger et al. 2021). Both these groups  
294 of proteins showed an age-dependent decrease of protein- but not transcript-levels (Figure  
295 2G and H). On the other hand, myelin components, e.g., myelin basic protein (MBP) and  
296 myelin protein P0 (MPZ), and intermediate filament proteins, e.g. glial fibrillary acidic protein  
297 (GFAP) and alpha-internexin (INA), showed decreased transcript- but not protein-levels with  
298 aging (Figure 2I), likely due to their long half-lives and low turnover rates.

299 Together, our data identify specific classes of proteins that experience “decoupling” between  
300 protein and transcript levels in the aging vertebrate brain. We identify distinct biophysical and  
301 biochemical characteristics linked to different patterns of dysregulation between protein and  
302 transcript levels. This suggests the presence of shared molecular attributes that contribute to  
303 aging-linked decoupling phenomena.

304



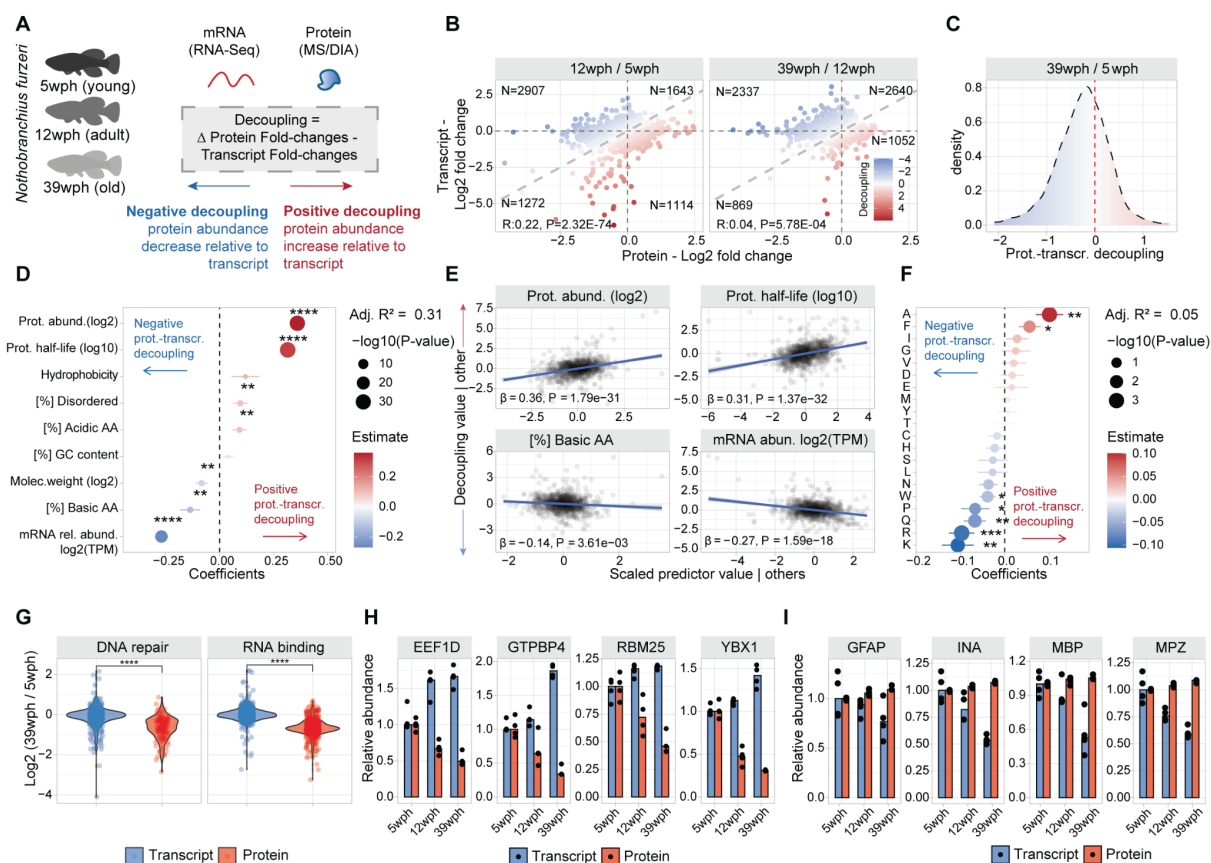

305

306 **Figure 2: Protein-transcript decoupling affects highly abundant and basic proteins in opposite manners.**

307 A) Workflow describing the characterization of protein-transcript decoupling in the killifish aging brain. Age-related  
 308 changes in transcriptome and proteome are compared to compute the decoupling metrics. For a specific protein,  
 309 positive decoupling values indicate a relative increase in protein abundance compared to its transcript, while  
 310 negative decoupling indicates a relative decrease in protein abundance compared to its transcript. B) Scatterplot  
 311 comparing protein- (x-axis) and transcript-level (y-axis) fold changes in killifish aging brain. The color of each dot  
 312 represents the decoupling score calculated as the difference between log2 transformed fold changes measured at  
 313 the protein and transcript levels. Grey dashed lines indicate the equal changes between transcript and protein and,  
 314 therefore, a zero decoupling score. C) Density distribution of decoupling scores for the comparison of 39 wph vs.  
 315 5 wph. On the right part, highlighted in red are positive decoupling events (increase in protein abundance compared  
 316 to the transcript), while on the left in blue are negative decoupling events (decrease in protein abundance compared  
 317 to the transcript). Significant changes are defined as Q-value < 0.1. D) Multiple linear regression analysis of  
 318 decoupling scores based on biophysical features of transcripts or proteins as predictors. The x-axis indicates the  
 319 estimate of the regression coefficient for each feature, while the size of the dots and asterisks represent the  $-\log_{10}$   
 320 P-values of the F-test. E) Added variable plot between selected biophysical features and decoupling scores. F)  
 321 Multiple linear regression analysis of decoupling scores based on percentage of protein amino acid composition  
 322 as predictors. The x-axis indicates the estimate of the regression coefficient for each feature, while the size of the  
 323 dots and asterisks represent the  $-\log_{10}$  P-values of the F-test. G) Transcript and protein level fold changes for RNA  
 324 binding and DNA repair proteins for the comparison of 39 wph vs. 5 wph. H and I) Selected examples of proteins  
 325 showing negative (H) and positive (I) decoupling in the aging killifish brain, N=3-4. \*P ≤ 0.05; \*\*P ≤ 0.01, \*\*\*P ≤  
 326 0.001, \*\*\*\*P ≤ 0.0001. Related to Figure S5 and Table S4.

327

328

329

330

## 331 **Decoupling correlates with changes in detergent-insolubility and** 332 **affects ribosomes and respiratory chain complexes**

333 To explore the interconnections among the various dimensions of proteome changes in the  
334 aging brain, we conducted a gene set enrichment analysis for each layer of the proteome  
335 alterations. We then used principal component analysis (PCA) to summarize the normalized  
336 enrichment scores (NES) and K-means clustering to identify Gene Ontology (GO) terms that  
337 showed correlated changes (Figure 3A, Figure S6A, see methods). By calculating Pearson's  
338 correlation coefficient between enrichment scores across datasets, we could define  
339 relationships between different layers of aging-linked changes. We found a positive correlation  
340 between protein-transcript decoupling and increased detergent insolubility, a hallmark of  
341 protein aggregation (Pearson's  $R = 0.28$ ,  $P < 2.20E-16$ ), as well as protein phosphorylation  
342 (Pearson's  $R = 0.26$ ,  $P = 6.67E-08$ ), while other alterations, for instance, changes in protein  
343 ubiquitylation, showed a smaller correlation value (Pearson's  $R = 0.11$ ,  $P = 1.23E-02$ , Figure  
344 3B).

345 To unbiasedly identify the most prominently affected cellular components in our analysis, we  
346 ranked GO terms by calculating the values of their projections on the first two principal  
347 component axes. We found that the highest-ranking terms were related to components of the  
348 mitochondrial respiratory chain and ribosomes (Figure 3C). These two sets of protein  
349 complexes were often affected by aging in opposite ways (Figure 3C). Components of the  
350 respiratory chain showed a progressive decrease in their transcripts together with a stable or  
351 modest increase of the corresponding protein levels (Figure 3D-E, Figure S6B). Respiratory  
352 chain proteins also showed an overall increase in detergent insolubility with aging (Figure 3F-  
353 G). Importantly, these alterations primarily affected respiratory chain components but not  
354 mitochondrial proteins in general (Figure S6C). To corroborate these findings, we interrogated  
355 our subcellular fractionation data (Figure S1). This analysis allowed us to identify two key  
356 aspects: (i) changes in the protein composition of aged mitochondria, notably a significant  
357 decrease in the relative abundance of mitochondrial ribosomes and an increase in the relative  
358 abundance of oxidative phosphorylation (Figure 3H and Figure S6D), and (ii) altered  
359 subcellular distribution of specific mitochondrial proteins (Figure S6E-F). These analyses  
360 provide support for a global remodeling of the mitochondria during aging.

361 Both cytosolic and mitochondrial ribosomal protein levels progressively decreased during  
362 aging (reaching, on average, a ~25% reduction in old brains), while their corresponding  
363 transcripts increased (Figure 3I-J, Figure S6G-H). The reduced level of ribosomal proteins  
364 was accompanied by a decreased detergent insolubility (Figure 3K-L, S6H-I). This alteration  
365 might be related to the loss of ribosome stoichiometry and partial mis-/disassembly that we  
366 previously described in the old killifish brain (Kelmer Sacramento et al. 2020). Interestingly,  
367 we noticed similar patterns for other large complexes rich in basic amino acids, like RNA  
368 polymerase II (Figure S6J-K), that might indicate common mechanisms altering the  
369 homeostasis of these key complexes. These results show a significant association between  
370 protein-transcript decoupling and other protein alterations in the aging brain that affect  
371 ribosomes and mitochondrial respiratory chain complexes preferentially and in opposite  
372 directions.

373

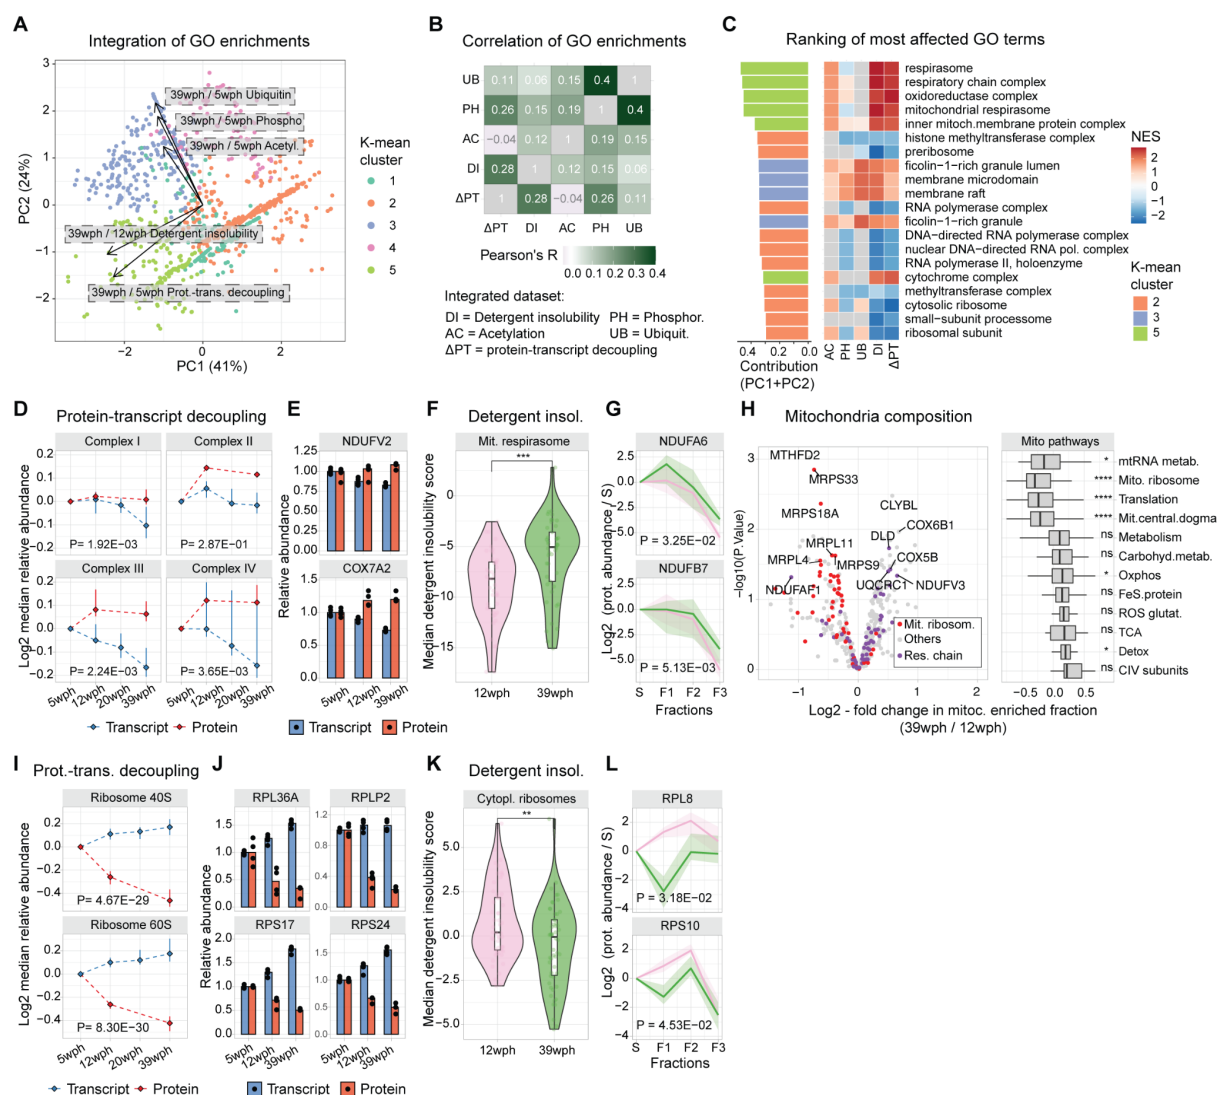

374

375

376 **Figure 3: Ribosomes and respiratory chain complexes are major nodes affected in the aging brain.**

377 A) Principal component analysis (PCA) showing the relationship between different age-related proteome  
 378 alterations. PCA was performed on normalized enrichment scores (NES) calculated by gene set enrichment  
 379 analysis for each dataset. Every dot represents a GO term (cellular component). Arrows show the contribution of  
 380 each dataset to the first two principal components. Colors indicate different clusters of GO terms obtained by k-  
 381 means clustering. B) Heatmap showing pairwise correlations of NES values across the different datasets. DR =  
 382 Detergent insolubility,  $\Delta$ PT = protein-transcript decoupling induced by aging, AC=Acetylation, PH=Phosphorylation,  
 383 UB=Ubiquitylation. C) Top-ranking GO terms displaying the strongest contribution to the PCA analysis. GO terms  
 384 were ranked by summing scores along the first two principal components. The barplot colors indicate the cluster  
 385 membership of the GO terms, as shown in (A). The heatmap shows the NES values for each of the respective  
 386 terms across the different datasets. Gray tiles indicate GO terms that were not covered in the given dataset. D)  
 387 Line plots showing transcript (blue) and protein (red) median abundance for respiratory chain proteins across age  
 388 groups. Each point summarizes the median log<sub>2</sub> protein or transcript quantity for the indicated complex relative to  
 389 the 5 wph age group (set to 0). The line bars indicate 50% of the distribution across N=3-4 pools per age group.  
 390 P-values indicate the results of a MANOVA test run on the two multivariate distributions. E) Selected examples of  
 391 respiratory chain proteins displaying positive protein-transcript decoupling, N=4 pools. F) Violin plot displaying  
 392 detergent insolubility score for proteins of the mitochondrial respirasome (GO:0070469). Each dot represents the  
 393 median insolubility score of each protein across N=4 pools per age group; asterisks indicate the results of a two-  
 394 sample Wilcoxon test G) Examples of detergent insolubility profiles for respiratory chain proteins displaying  
 395 increased detergent insolubility with aging. The x-axis indicates the different detergent insolubility fractions:  
 396 S=soluble, F1:F3=fractions after solubilization with buffers of increasing detergent strength (see methods, Figure

397 S2A). The y-axis indicates log<sub>2</sub> protein quantities relative to the soluble (S) fraction. The shaded area indicates  
398 50% of the distribution across N=4 pools per age group. H) On the left, the volcano plot displays changes in  
399 mitochondrial proteome composition in response to aging. The x-axis indicates the log<sub>2</sub> mitochondrial proteome  
400 fold changes, and the y-axis indicates the -log<sub>10</sub> P-value of the moderated Bayes T-test. On the right, a box plot  
401 showing the effect of aging on different groups of mitochondrial pathways (annotation from MitoCarta 3.0). Each  
402 group was tested against the rest of the mitochondrial proteins using a two-sample Wilcoxon test, corrected for  
403 multiple testing using FDR correction. Only groups with Adjusted P-value<0.1 are shown. I) Line plots showing  
404 transcript (blue) and protein (red) median abundance for ribosomal proteins across age groups. Each point  
405 summarizes the median log<sub>2</sub> protein or transcript quantity for the indicated complex relative to the 5 wph age group  
406 (set to 0). The line bars indicate 50% of the distribution across N=3-4 pools per age group. J) Selected examples  
407 of ribosomal proteins showing negative protein-transcript decoupling, N=3-4. K) Violin plot displaying detergent  
408 insolubility score for cytoplasmic ribosomal subunits. Each dot represents the median insolubility score of each  
409 protein across N=4 pools per age group. L) Examples of detergent insolubility profiles for ribosomal proteins  
410 displaying decreased detergent insolubility with aging. The x-axis indicates the different detergent insolubility  
411 fractions: S=soluble, F1:F3=fractions after solubilization with buffers of increasing detergent strength (see methods,  
412 Figure S2A). The y-axis indicates log<sub>2</sub> protein quantities relative to the soluble (S) fraction. The shaded area  
413 indicates 50% of the distribution across N=4 pools per age group. \*P ≤ 0.05; \*\*P ≤ 0.01, \*\*\*P ≤ 0.001, \*\*\*\*P ≤  
414 0.0001. Related to Figure S6.

415

## 416 **Proteasome impairment recapitulates organelle-specific aging** 417 **hallmarks, but not protein-transcript decoupling**

418 Protein degradation by the ubiquitin-proteasome system has a major role in regulating protein  
419 levels and contributes to the maintenance of key organelles and protein complexes, including  
420 ribosomes and mitochondria. Previous studies (Kelmer Sacramento et al. 2020; Hipp, Kasturi,  
421 and Hartl 2019; Gray, Tsirigotis, and Wouffe 2003) have shown a connection between brain  
422 aging and a decline in proteasome activity. Consequently, we investigated the effects of a mild  
423 but extended experimentally-induced reduction of proteasome activity on brain aging  
424 phenotypes. To this end, we simulated the impairment observed during aging by imposing a  
425 chronic reduction of proteasome activity in adult killifish. We optimized *in vivo* dosage of  
426 bortezomib, a dipeptide that binds with high affinity and blocks the catalytic site of the  
427 proteasome, to maintain a ~50% inhibition in the brain of adult killifish over 4 weeks without  
428 inducing overt toxicity and affecting animal well-being (Figure 4A, Table S5). GO enrichment  
429 analysis of brain proteome and transcriptome changes showed induction of adaptive  
430 responses to bortezomib characterized by over-representation of terms related to the  
431 proteasome (Figure 4A) and specific alterations of the proteostasis network (Figure S7A).  
432 These include increased protein levels of proteasome activators (PSME1/PA28 $\alpha$ ,  
433 PSME3/PA28 $\gamma$ , and PSME4/PA200) and increased mRNA levels of key autophagy genes  
434 such as *ATG5* and *ATG7* (Figure 4B). Some of these adaptive responses, e.g., increased  
435 levels of the small heat shock protein HSPB1 (also known as HSP27) and HSPA6, a member  
436 of the HSP70 family, were also detected in the brain of old killifish (Figure 4B).  
437 Immunofluorescence analysis of lysosomes revealed a marked increase in their area, volume,  
438 and sphericity both upon proteasome impairment (Figure 4C) that replicates morphological  
439 changes observed during aging (Figure S7B). Lysosomal swelling is also a typical  
440 characteristic of lysosomal storage disorders (de Araujo et al. 2020) and increased lysosomal  
441 size has also been linked to TDP-43 related Fronto-Temporal Dementia (FTD-TDP43) (Stagi  
442 et al. 2014). We also noted that proteasome impairment induced a global decrease in the level  
443 of mitochondrial proteins, which was entirely due to post-transcriptional mechanisms (Figure  
444 4D). Consistently, we did not detect changes in master regulators of mitochondrial genes

445 (Figure S7C). We validated the decreased mitochondrial content by quantifying the ratio of  
446 mitochondrial DNA (mtDNA) to nuclear DNA and showed that similar to aging, proteasome  
447 impairment also induced a significant reduction of mtDNA (Figure 4D-S7D).

448 Next, we asked whether proteasome impairment could also recapitulate the age-related  
449 protein-transcript decoupling that we characterized. As expected, proteasome impairment led  
450 to increased abundance of shorter-lived proteins, consistent with the role of the ubiquitin-  
451 proteasome system in regulating their turnover (Figure S7E). Combined analysis of RNAseq  
452 and proteome data showed that proteasome impairment indeed induced protein-transcript  
453 decoupling (Figure S7F, Table S5). However, when we applied the same multiple linear  
454 regression models used for aging, we found that the biophysical properties associated with  
455 decoupling by bortezomib are distinct from those associated with decoupling during aging  
456 (Figure S7F). Consistently, the decoupling values caused by proteasome impairment or aging  
457 were negatively correlated (Spearman Rho = -0.25,  $P < 2.20E-16$ , Figure 4E), also for the  
458 specific cases of ribosomes (Figure 4F) and respiratory chain complexes (Figure 4G).  
459 Together, our findings reveal that partial and chronic inhibition of the proteasome elicits  
460 specific adaptive responses in adult killifish, some of which are also observed in aged brains.  
461 However, proteasome impairment alone is not able to fully recapitulate age-linked proteome  
462 changes, most prominently the age-related protein-transcript decoupling.

463

464

465

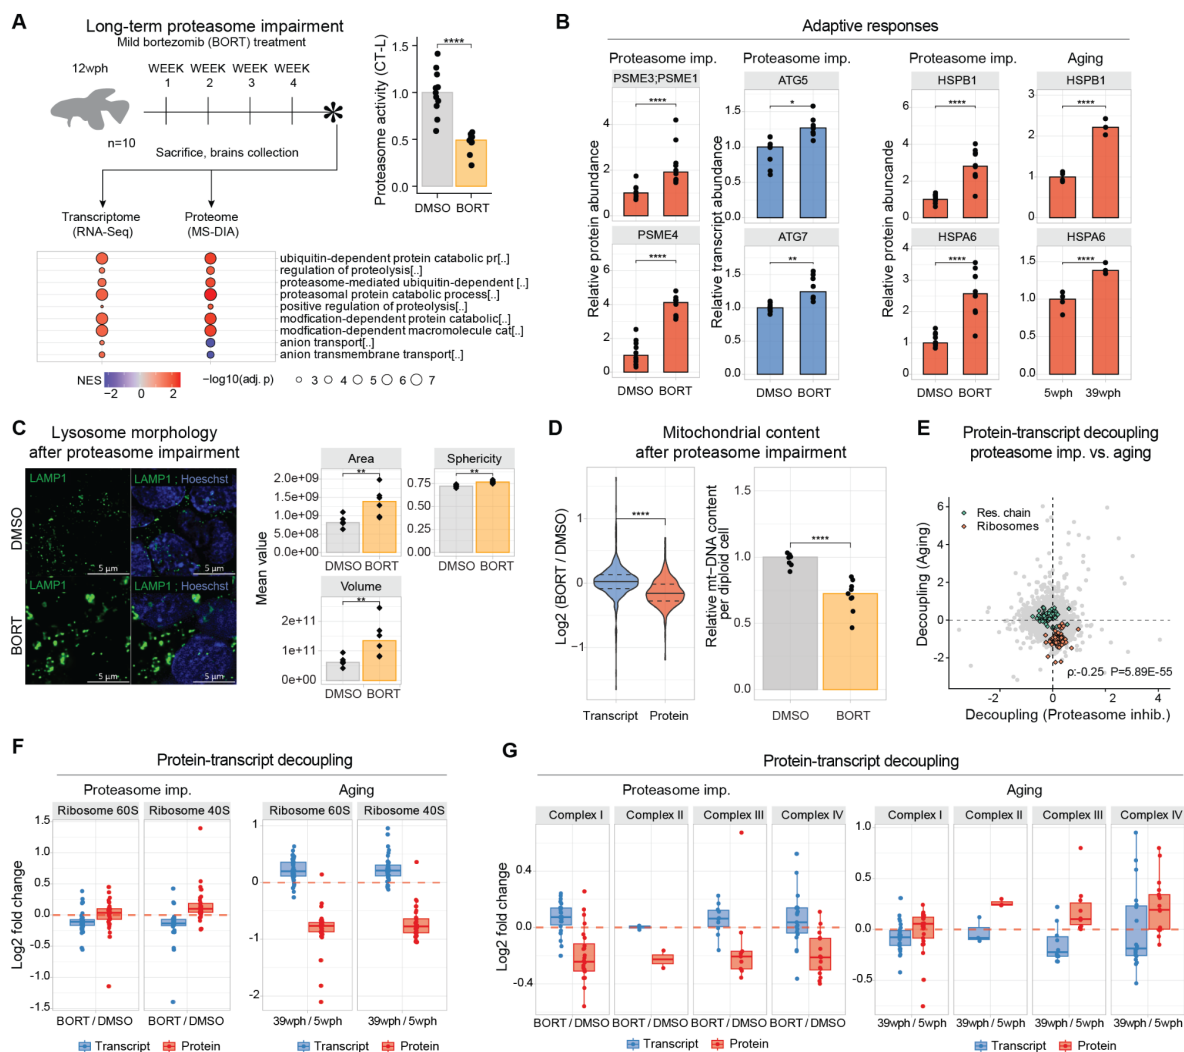

466

467

468

469

470

471

472

473

474

475

476

477

478

479

480

481

482

483

484

485

486

487

488

489

**Figure 4: Effects of four weeks *in vivo* proteasome impairment on the killifish brain.** A) Adult killifish (12 wph, N=10) were treated for 1 month, every week, with an intraperitoneal injection of the proteasome inhibitor bortezomib or vehicle control (DMSO). The bottom panel shows a Gene Set Enrichment Analysis (GSEA) of the proteasome impairment sample (BORT/DMSO). Color code indicates the normalized enrichment score (NES) while dot size indicates the  $-\log_{10}$  of the adjusted P-value of the Kolmogorov-Smirnov tests (Holm's correction). The top-right panel shows quantification of chymotrypsin-like (CT-L) proteasome activity in brain lysates following repeated injections of bortezomib or DMSO control. Asterisks indicate the results of a two-sample Wilcoxon test, N=10. B) (Left panel) Barplot showing normalized protein quantity (relative to DMSO control, set to 1) of selected proteins (red) and transcript (blue) involved in the proteostasis network and their respective in aging (Right panel). Asterisks indicate the Q-value of the differential abundance testing performed with a two-sample T-test on the peptide abundances N=10. C) (Left panel) Immunofluorescence stainings for lysosome (LAMP1) in brain cryosections of control and treated *Nothobranchius furzeri*. Scale bars = 5 $\mu$ m. (Right panel) Barplot representation of lysosome morphology features in control (grey) and Bortezomib treated (orange) samples. The y-axis represents the mean value of the different morphology features in each replicates (N=6). D) (Left panel) Effect of proteasome impairment on mitochondrial transcripts and proteins. Asterisks indicate the results of a two-sample Wilcoxon test. (Right panel) Quantification of mitochondrial DNA (mt-DNA) from killifish brains. Relative mtDNA copy number was calculated using real-time quantitative PCR with primers for 16S rRNA mitochondrial gene and Cdkn2a/b nuclear gene for normalization (N=10). Asterisks indicate the results of two-sample Wilcoxon tests. E) Comparison of decoupling scores measured in aging (old vs. young comparison, y-axis) and upon partial proteasome impairment (bortezomib vs. DMSO, x-axis), proteins related to the respiratory chain (green) and ribosomal proteins (orange) are shown. Spearman correlation was selected due to the presence of outliers in the distribution. F) Comparison of decoupling induced by aging and proteasome impairment for ribosomes. G) Comparison of decoupling induced

490 by aging and proteasome impairment for oxidative phosphorylation proteins. \* $P \leq 0.05$ ; \*\* $P \leq 0.01$ , \*\*\* $P \leq 0.001$ ,  
491 \*\*\*\* $P \leq 0.0001$ . Related to Figure S7, Table S5.

492

## 493 **Translation pausing correlates with decreased levels of basic** 494 **proteins in old brains**

495 Our results suggest that factors other than proteasome dysfunction contribute to the  
496 dysregulation of protein homeostasis during aging. One potential alternative mechanism is the  
497 differential translation of specific mRNAs at old age, which could contribute to the age-related  
498 discrepancy between transcript and protein levels. Therefore, we assessed changes in  
499 translation output, estimated from transcript occupancy by ribosomes, via a Ribo-Seq  
500 experiment in the killifish aging brain (Figure 5A, Table S6). Quality assessment of the reads  
501 showed the characteristic tri-nucleotide periodicity (Figure S8A) and overall reproducibility  
502 across replicates (Figure S8B). We compared age-related changes in ribosome occupancy  
503 and mRNA levels and observed the expected positive correlation ( $R=0.25$ ,  $P < 2.20E-16$ ,  
504 Figure S8C). We then estimated changes in translation efficiency (TE) from RNA-Seq and  
505 Ribo-Seq (see methods) and compared them to proteome data. In line with previous findings  
506 in the rat brain (Ori et al. 2015), we observed a stronger positive correlation between the  
507 changes of TE and protein abundance ( $R=0.32$ ,  $P < 2.20E-16$ , Figure 5B) than between  
508 changes of transcript and protein abundance ( $R=0.23$ ,  $P < 2.20E-16$ ). Changes in TE led to  
509 consistent alterations in protein levels for specific proteins, such as members of the Complex  
510 IV of the respiratory chain, where increased TE was associated with higher steady-state  
511 protein levels (Figure 5C and S8D). Intriguingly, this was not the case for other protein  
512 complexes, including ribosomes, RNA polymerase II and other nucleic-acid binding proteins  
513 involved in DNA repair, where increased TE was associated with a paradoxical reduction of  
514 steady-state protein levels (Figure 5C, 5D, and S8D). These two modalities of protein  
515 regulation act independently of transcript regulation. In summary, we found that for some  
516 proteins, changes in TE with aging can amplify transcriptional changes, e.g., for proteasomes  
517 (Figure 5D), or compensate for transcript regulation, e.g., for respiratory chain complexes  
518 (Figure 5D and S8D). However, for some proteins, TE alone cannot explain the divergence  
519 between proteome and transcriptome, as in the case of ribosomal proteins (Figure 5D).

520 Recent studies showed that aging is associated with translation dysfunction in yeast and  
521 nematodes, whereby enhanced elongation pausing leads to ribosome collisions, abortive  
522 translation of stalled mRNAs and aggregation of their encoded nascent polypeptides (Stein et  
523 al. 2022). To assess if a similar effect of aging on translation could explain the apparent  
524 incongruence between mRNA and protein levels observed in aged killifish brains, we queried  
525 our Ribo-Seq data for signatures of translation pausing (i.e., analysis of pairs of highly  
526 occupied codons, see Experimental Procedures). Indeed, this analysis revealed an overall  
527 increase in site-specific pausing in the aging brain (Figure 5E, Table S6). Additionally, disome  
528 analysis provided evidence for increased ribosome collisions in the old brain (Figure 5F).  
529 Ribosome collision and stalling have been associated with changes in the ubiquitylation of  
530 ribosomal proteins (Meyer et al. 2020; Higgins et al. 2015; Yan et al. 2019). To assess the  
531 detection of these changes in the killifish system, we induced ribosome stalling in killifish cells  
532 using anisomycin and validated the appearance of a higher molecular weight band in  
533 immunoblot against the 40S subunit RPS3 (Figure S8E). A similar higher molecular weight  
534 band was detectable in aging killifish brains, and its ratio to total RPS3 increased with age

535 (Figure S8F). This enhanced ubiquitination was in contrast with multiple other sites of  
536 ribosomal protein ubiquitylation detected by mass spectrometry as these were, for most  
537 ribosomal proteins, reduced with aging (Figure S8G). Together, these data support an  
538 increase of ribosome collision in the aging killifish brain. Of note, similar to what is observed  
539 in yeast and nematodes, aging also causes a progressive decrease of a subset of proteins  
540 involved in ribosome quality control (RQC) in aged killifish brains (Figure S8H). Such  
541 impairment of RQC may exacerbate ribosome collision and stall with age and may also disrupt  
542 the degradation of stalled mRNAs, leading to their accumulation in the aged cells.

543 Analysis of the correlation between our measured proteomic features and translation  
544 alterations with age identified a positive correlation between translation pausing and increased  
545 detergent insolubility, which is considered a hallmark of aggregation (Figure 5G). These  
546 alterations affected key proteostasis network components such as the proteasome (Figure  
547 S8I). Remarkably, stretches enriched in basic residues (arginine and lysine), as well as  
548 glycine, were enriched at both pausing (Figure 5H) and disome sites (Figure S8J). These  
549 features are consistent with previous observations from yeast and nematodes (Stein et al.  
550 2022) and suggest a link between pausing, protein aggregation and proteostasis collapse in  
551 the aging vertebrate brain. Interestingly, the same residues (arginine and lysine) were  
552 associated with decreased protein levels in our decoupling model (Figure 2F). Consistently,  
553 we detected a significant correlation between translation pausing and protein-transcript  
554 decoupling (Figure 5I,  $R=-0.17$ ,  $P < 2.20E-16$ ). This indicates that translation pausing can  
555 explain a substantial fraction of the cases where reduced protein abundance is uncoupled  
556 from transcript regulation. More specifically, we observed increased pausing on transcripts  
557 coding for ribosomal and RNA-binding proteins, which exhibit a depletion at the protein level  
558 not reflected in their transcripts. At the same time, components of the respiratory chain did not  
559 show any remarkable deviation from the overall pausing distribution (Figure 5I), although  
560 different complexes showed distinct pausing profiles (Figure S8K). Alterations in translation  
561 efficiency and pausing have been linked to changes in mRNA half-life (Sharma et al. 2021;  
562 Chan et al. 2018; Schwartz and Parker 2000). Therefore, we estimated age-related alterations  
563 in mRNA half-life by calculating changes between exonic and intronic reads (Gaidatzis et al.  
564 2016). Interestingly, we observed that in old brains transcripts encoding for ribosomal proteins  
565 and RNA-binding proteins showed increased half-life compared to the rest of the transcriptome  
566 (Figure 5J), suggesting that the increase in transcript levels might not be the result of increased  
567 transcription of these genes. Together these results show that increased ribosome occupancy  
568 does not necessarily result in enhanced protein synthesis in the aging brain, possibly due to  
569 increased pausing at some mRNAs. Furthermore, translation pausing is associated with  
570 signatures of ribosome collisions, which correlate with changes in protein solubility. We thus  
571 propose that translation dysfunction may represent the underlying cause for the decreased  
572 levels of ribosomal proteins and other nucleic-acid binding proteins in the aging brain. Taken  
573 together, our data suggest a link between translation pausing, protein aggregation and  
574 proteome alterations affecting proteostasis in the aging vertebrate brain.

575



576

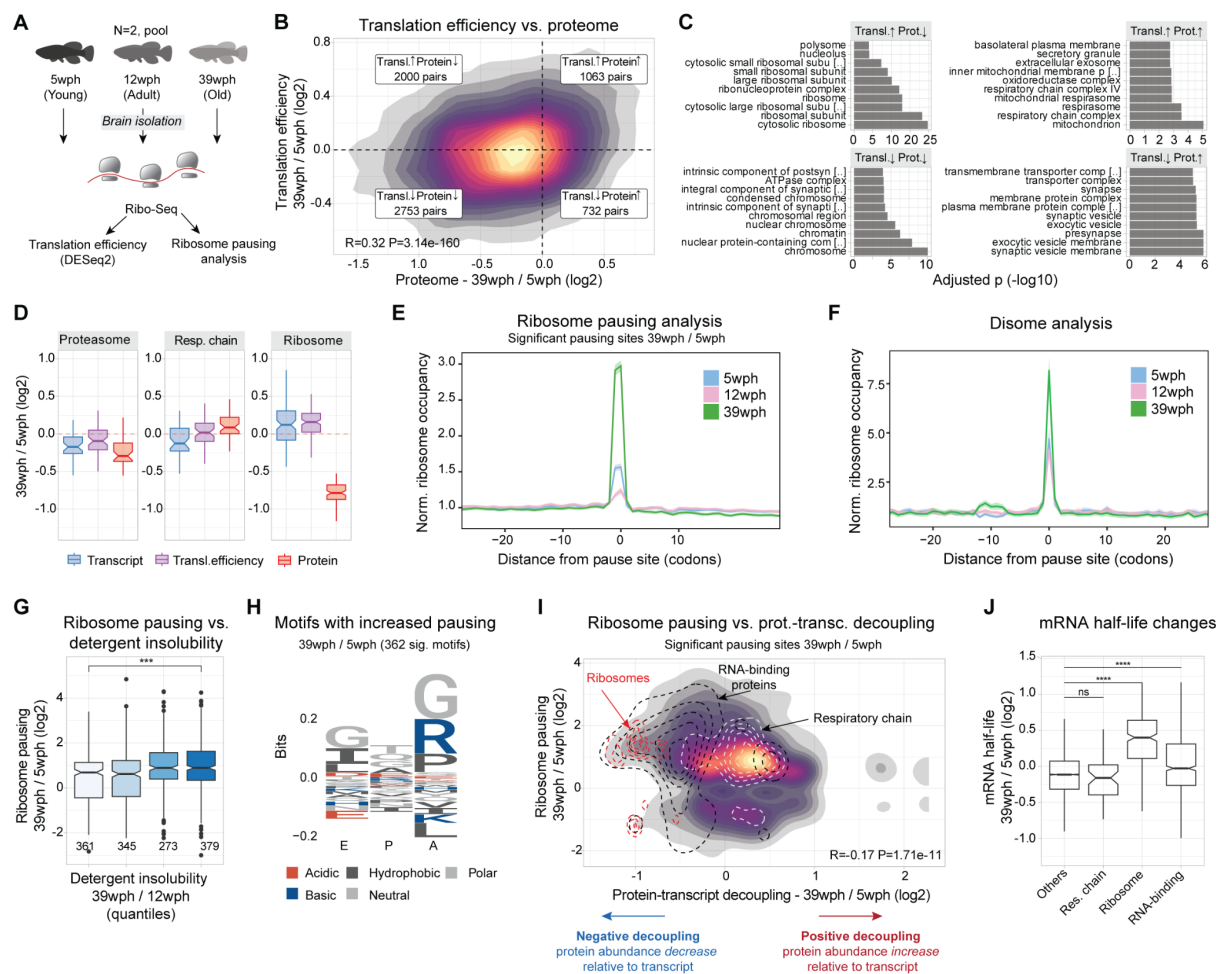

577

578 **Figure 5: Increased translation pausing in the aging killifish brain.** A) Workflow of the experiment. Ribosome  
 579 profiling was performed on Young (5 wph), Adult (12 wph), and Old (39 wph) *Nothobranchius furzeri* brains. Each  
 580 (N=2) replicate consisted of a pool of 10-15 animals depending on the age group. B) 2-D density plot showing the  
 581 relationship between age-related changes in protein abundance (x-axis) and changes in translation efficiency (y-  
 582 axis). In each quadrant are summarized the number of protein and transcript pairs. C) GOEnrichment analysis (ORA)  
 583 on each quadrant shown in B. The x-axis indicates the  $-\log_{10}$ (adjusted P-value) of the Fisher test with Holm  
 584 correction. D) Boxplot displaying differential modes of regulation, for example, protein complexes. On the x-axis  
 585 are displayed the different datasets: Transcriptome (green), Translation efficiency (purple), and Proteome (red) for  
 586 26S Proteasome, oxidative phosphorylation, and cytoplasmic ribosomes. E) Lineplot showing the normalized  
 587 ribosome distribution at different pausing sites for different age groups. The x-axis represents the distance (in  
 588 codons) from the pausing site, while on the y-axis the normalized ribosome occupancy is shown. F) Lineplot  
 589 showing the normalized disome ribosome distribution at different disome pausing sites for different age groups.  
 590 The x-axis represents the distance (in codons) from the disome pausing site, while on the y-axis the normalized  
 591 ribosome occupancy is shown. G) Boxplot showing the relationship between solubility and ribosome pausing. On  
 592 the x-axis, the solubility values are grouped according to quantiles. Each quantile holds for 25% of the protein  
 593 distribution. On the y-axis, the  $\log_2$  fold changes in pausing for each significant (Adjusted P-value < 0.05) pausing  
 594 site. Numbers in black indicate the number of observations in each of the distributions. H) Weblogo for residues  
 595 that display a strong increase in pausing (Pause score > 10) in 39 wph/5 wph. The y-axis displays the relative  
 596 frequencies of the different residues, while the x-axis displays the different ribosome positions (E, P, A). I) 2-D  
 597 density plot showing the relation between significant changes in pausing (Adjusted P-value < 0.05) displayed on  
 598 the y-axis and the decoupling metrics (x-axis). Each point in the distribution represents a significantly altered  
 599 pausing site. Contour lines indicate the distribution of cytoplasmic ribosomes (red), RNA-binding proteins (black),  
 600 and oxidative phosphorylation (white). J) Boxplot showing mRNA half-life estimate changes (see methods) between  
 601 39 wph and 5 wph. The x-axis represents different selected categories. Asterisk indicates the results of a two-  
 602 sample Wilcoxon test with Holm correction. \*P ≤ 0.05, \*\*P ≤ 0.01, \*\*\*P ≤ 0.001, \*\*\*\*P ≤ 0.0001. Related to Figure  
 603 S8, Table S6.

## 604 **Proposing a possible model for a reshaping of translation in the** 605 **aging brain**

606 The results presented so far point to alterations in protein synthesis in old brains leading to a  
607 reduction of ribosomal proteins, among others. We hypothesized that the ensuing lower levels  
608 of ribosomes, particularly in light of increased load on the RQC machineries, may in turn lead  
609 to a vicious cycle of dysfunction. Altered ribosome concentration has been known to directly  
610 impact the translation of specific mRNAs, as observed in a group of inherited diseases  
611 collectively referred to as 'ribosomopathies' (Mills and Green 2017; Khajuria et al. 2018). We  
612 thus attempted to extend a model proposed by (Mills and Green 2017; Khajuria et al. 2018) to  
613 the aging scenario. The original model predicts that the protein output of specific mRNAs can  
614 be influenced by ribosome availability depending on transcript-specific translation initiation  
615 rate  $k_i$  (where  $k_i$  refers to the affinity of specific mRNAs sequences to bind ribosomes) (Mills  
616 and Green 2017; Khajuria et al. 2018). Under these assumptions, a decrease in ribosome  
617 concentration can, for example, increase protein synthesis from transcripts that have a high  
618 translation initiation rate by lowering the total ribosome load on them and therefore relieving  
619 trafficking and pausing events (Figure 6A). To test this hypothesis in the context of aging brain,  
620 we estimated  $k_i$  from killifish 5'-UTR sequences based on experimental data (Noderer et al.  
621 2014), and modeled the estimated synthesis rate as described in (Mills and Green 2017;  
622 Khajuria et al. 2018) (see methods, Figure 6A, Table S7). In agreement with the model, a  
623 subset of killifish transcripts displayed an increase in predicted synthesis rate as a function of  
624 decreased ribosome concentration (orange cluster in Figure 6A and Table S7). To test these  
625 predictions on our experimental data, we selected a specific set of proteins showing decreased  
626 translation pausing and increased protein abundance in our decoupling model (60 proteins,  
627 bottom right quadrant in Figure 5I). We then estimated their predicted synthesis rates as a  
628 function of ribosome concentration. Consistent with the experimental data, the relative  
629 synthesis of this subset of proteins was predicted to increase following a reduction of ribosome  
630 concentration (Figure 6B). Approximately one-third of these proteins were mitochondrial  
631 (including 7 components of the respiratory chain), and another prominent fraction belonged to  
632 proteins related to neuron projections (Figure 6B). Intriguingly, the absence of ribosomal  
633 proteins in this subset, despite their high  $k_i$  value, indicates distinct translation dynamics for  
634 these proteins resulting from their increased elongation pausing during aging. These results  
635 provide evidence that reduced ribosome concentration in aged brains, likely triggered by  
636 aberrant pausing events, might remodel a subset of the proteome independently of transcript  
637 levels and regulation (Figure 6C).

638

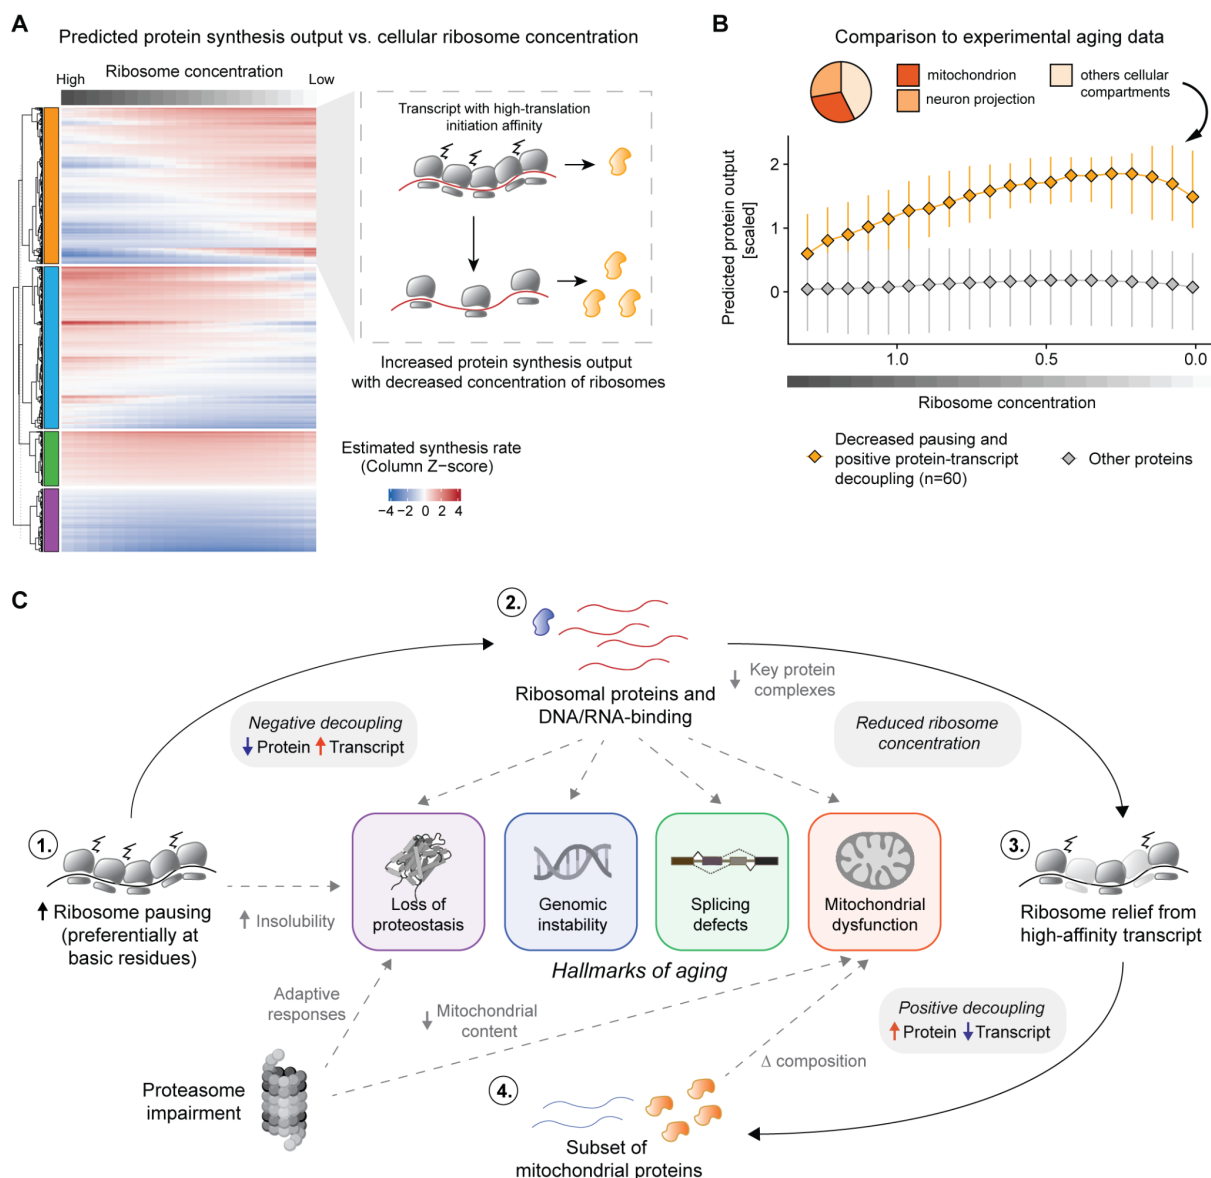

639

640 **Figure 6: Reduced ribosome levels can lead to translation reprogramming in the aging brain.** A) Heatmap  
 641 showing the estimated protein output, modeled as described in Mills and Green 2017. Each column in the heatmap  
 642 indicates the estimated protein output for a specific ribosome concentration. Transcripts are clustered with a  
 643 hierarchical clustering using the “ward D2” algorithm on the dissimilarity (1 - Person’s correlation) measure. For  
 644 display purposes, the heatmap represents 5000 rows randomly sampled from all datasets. In the right panel, an  
 645 illustrative example of a cluster displaying increased estimated protein output as a function of reduced ribosome  
 646 levels. For these transcripts, the general ribosome decrease is predicted to relieve trafficking and pausing, leading  
 647 to overall improved protein production. B) Lineplot showing the estimated protein output for transcript displaying  
 648 decreased ribosome pausing in the Ribo-Seq data (median per transcript log<sub>2</sub> Pausing 39 wph / 5 wph < 0 and  
 649 Adjusted P-value <=0.15) and increased protein levels relative to the transcript in the decoupling model (orange).  
 650 The x-axis represents the simulated decreased ribosomal concentration, while the y-axis indicates the estimated  
 651 protein output, as shown also in A. C) Schematic representation of the translation reprogramming model and its  
 652 connection with the relevant hallmarks of aging. Aging is associated with increased ribosome collision and pausing  
 653 on ribosomal proteins, leading to a ~25% reduction of ribosome levels. This generalized decrease of available  
 654 ribosomes could drive the translation of other high-affinity mRNAs leading to increased protein levels in the aging  
 655 brain. Related to Table S7.

656

657

## 658 Discussion

659 Our work provides an integrated view of the changes in the diverse mechanisms comprising  
660 proteostasis and illuminates how they contribute to the remodeling of the vertebrate brain  
661 proteome during aging. We demonstrate that aging brains exhibit profound alterations in their  
662 proteome, manifested as changes in protein synthesis, solubility, post-translational  
663 modification and, organelle composition compared to younger ones. We also observe  
664 significant changes in the composition of their proteome, such as an overall reduction in  
665 ribosome levels, that do not correspond to changes in mRNA abundance. Our analysis further  
666 suggests that such proteome changes are driven in significant measure by alterations in  
667 translation, including increased elongation pausing at specific polybasic stretches. A corollary  
668 of these changes is that aging protein synthesis may no longer respond faithfully to changes  
669 in transcriptional programs. Accordingly, we observe that increased ribosome occupancy does  
670 not necessarily translate to higher protein synthesis in aged brains. Furthermore, we identify  
671 limitations in adaptive responses, such as the ones to proteasome impairment, which are only  
672 partially mounted in old brains. By unraveling these age-dependent events and understanding  
673 their underlying logic, we begin to establish connections between proteostasis alterations and  
674 other hallmarks of aging. These include mitochondrial and lysosomal dysfunction as well as  
675 aberrant RNA synthesis, splicing and, genome stability, given that translation of proteins  
676 involved in these processes is affected by age (Figure 6C).

677 Based on our observations, we propose that there are at least three different modalities in  
678 which protein production can be affected in the aging brain: (i) transcriptional modulation, i.e.,  
679 changes in protein production that are influenced by the level of mRNA. For example, in the  
680 case of proteasomes, where decrease in protein abundance with age is associated with lower  
681 levels of mRNAs (Figure 5D). (ii) Translational modulation, i.e., changes in protein production  
682 that occur at the level of translation efficiency. This is exemplified by some components of the  
683 respiratory chain, particularly Complex IV, that show increased protein levels in old brains. In  
684 this case, reduced levels of mRNA are compensated by higher ribosome occupancy and more  
685 efficient protein synthesis (Figure S8D). (iii) Translational pausing, i.e., a specific type of  
686 modulation where prevalently proteins rich in basic amino acids, such as ribosomal and other  
687 nucleic acid binding proteins, experience increased translation stalling. This correlates with  
688 higher levels of mRNA but subsequently leads to unproductive protein synthesis.

689 The aging-linked changes in protein biosynthesis that we describe have two direct  
690 implications. First, the availability of a subset of protein complexes, notably those containing  
691 regions enriched in basic amino acids, is reduced in the aging brain. These complexes include  
692 those involved in all the major steps of protein biosynthesis, including ribosomes themselves  
693 but also other RNA-binding proteins involved in splicing, as well as RNA and DNA  
694 polymerases and DNA repair proteins. Interestingly, previous studies have proposed a  
695 translation control mechanism for this class of proteins influenced by the presence of lysine  
696 and basic amino acids (Arthur et al. 2015). All biological functions linked to these protein  
697 complexes have been shown to decline or become perturbed with age, and indeed their  
698 dysfunction is recognized as “hallmarks of aging”. Perhaps, the common biophysical  
699 properties of the components of these protein complexes make them vulnerable to translation  
700 dysfunction with aging. Consequently, the observed impairment of protein biosynthesis with  
701 aging may contribute to other aging hallmarks that generally depend on nucleic acid binding  
702 proteins (López-Otín et al. 2023). The interplay of these processes in all the major steps of

703 protein synthesis may amplify these dysfunctions in a vicious feedback loop that further  
704 impairs proteostasis. Of note, individual manipulation of any of these pathways has been  
705 shown to ameliorate aging phenotypes (Schumacher et al. 2021; Bhadra et al. 2020;  
706 Bozukova et al. 2022; Gyenis et al. 2023; Debès et al. 2023; Gonskikh and Polacek 2017).

707 The second implication is that aging leads to a change in the protein composition of organelles,  
708 in particular mitochondria. Remodeling of protein biosynthesis leads to a reduction of  
709 mitochondrial ribosomes, similarly to other basic proteins, while components of the respiratory  
710 chain are maintained or even increased, as in the case of Complex IV. These observations  
711 based on bulk tissue measurements were corroborated by more direct analysis of the  
712 composition of mitochondria from subcellular fractions and by other age-dependent alterations  
713 of mitochondrial proteins, e.g., in detergent insolubility and sedimentation profiles. A  
714 compositional change of the brain mitochondrial proteome with age aligns with previous  
715 observations from other species (Ingram and Chakrabarti 2016), and with ultrastructural and  
716 functional alterations reported in aging and age-associated diseases (Heiby and Ori 2022).  
717 We also found that other aspects of mitochondria aging in the brain, i.e., reduced mtDNA  
718 content, were instead dependent on decreased proteasome activity, highlighting the  
719 convergence of multiple aging mechanisms in determining the levels and composition of key  
720 cellular structures such as mitochondria (Figure 6C).

721 Our data demonstrate that increased translation pausing during aging is an evolutionarily  
722 conserved phenomenon (Stein et al. 2022). Future analyses should clarify the mechanistic  
723 and/or regulatory events leading to increased translation pausing with age and their  
724 relationship with other age-related alterations of ribosomes, including loss of stoichiometry  
725 and aggregation (Kelmer Sacramento et al. 2020). One of the mechanisms potentially  
726 contributing to increased translational pausing could reside in the decrease in ATP levels that  
727 is typically observed in old tissues (Miyoshi et al. 2006; Braeckman, Houthoofd, and  
728 Vanfleteren 2002; Gkotsi et al. 2014; Espada et al. 2020). This reduction in energy levels might  
729 alter the decoding kinetics for specific non-optimal codons, such as the ones encoding basic  
730 amino acids (Bazzini et al. 2016; da Silva et al. 2023), leading to a decreased synthesis rate  
731 for these proteins. We also identified distinctive changes in protein ubiquitylation in ribosomal  
732 proteins, some of which have been previously associated with ribosome collision induced by  
733 different types of translation or proteotoxic stress (Higgins et al. 2015; Yan et al. 2019).  
734 However, it remains unclear whether these modifications are a cause or consequence of  
735 increased pausing. For ribosomes, decoupling in aging manifests as a decrease in protein  
736 levels together with a progressive increase in transcript levels. These findings are consistent  
737 with several observations. First, an age-dependent increase of transcripts encoding for  
738 ribosomal proteins has been observed by single-cell RNAseq in multiple cell types of the  
739 murine brain (Ximerakis et al. 2019). Accordingly, increased levels of transcripts encoding for  
740 ribosomal proteins were one of the most consistent transcriptional signatures of longevity  
741 shared across multiple tissues and mammalian species (Tyshkovskiy et al. 2023).  
742 Interestingly, our results suggest that this increase might not result from increased  
743 transcription but rather from increased mRNA stability. Decreased abundance of ribosomal  
744 proteins with age has been described in multiple organs in mice (Yu et al. 2020), as well as in  
745 nematodes (Koyuncu et al. 2021), and the protein half-life of ribosomes is affected by aging  
746 in the mouse brain (Kluever et al. 2022). These data suggest that similar mechanisms might  
747 affect ribosomes in different cell types and organs during mammalian aging. Translation  
748 pausing may also represent a converging pathophysiological mechanism shared between

749 aging and neurodegenerative diseases, as ribosome stalling has been linked to perturbation  
750 of proteostasis in different types of neurodegenerative diseases (Z. Wu et al. 2019; Rimal et  
751 al. 2021; S. Li et al. 2020; Aviner et al. 2022).

752 Other mechanisms that have not been investigated in this study can additionally contribute to  
753 protein-transcript decoupling. For instance, age-dependent impairment of protein degradation  
754 by the autophagy-lysosome system can lead to the accumulation of specific proteins (Aman  
755 et al. 2021), as has been shown for myelin basic protein (MBP) in microglia (Safaiyan et al.  
756 2016). Interestingly, although induction of initial stress response was congruent in aging and  
757 after proteasome impairment, a compensatory activation of autophagy was induced by  
758 proteasome impairment in adults but not during aging. This discrepancy explains, at least in  
759 part, the anti-correlation that we observed between bortezomib-induced and age-related  
760 decoupling and leaves open the interesting question of why aging brains fail to mount a  
761 compensatory response to proteasome dysfunction. In this regard, it is noteworthy that aging  
762 impairs the ability to respond to heat shock in *C. elegans* (Johnathan Labbadia and Morimoto  
763 2015). In addition, stalling of RNA polymerase II has been described to occur with aging,  
764 thereby skewing the output of transcription in a gene-length dependent manner (Gyenis et al.  
765 2023), consistent with a systemic loss of long transcripts observed in multiple aging tissues  
766 and species (Stoeger et al. 2022). A reduction in the abundance of specific transcripts could  
767 increase transcriptional noise, lead to an imbalance in the stoichiometry of protein complexes,  
768 but also alter the relationship between mRNA and protein levels, especially for long-lived  
769 proteins.

770 Finally, our work might contribute to the understanding of the relationship between aging and  
771 the risk of neurodegenerative diseases. We provide an unprecedented resource (accessible  
772 at <https://genome.leibniz-fli.de/shiny/orilab/notho-brain-atlas/>,  
773 after final publication) of proteome alterations in the aging vertebrate brain and show that  
774 multiple proteins and signaling pathways associated with neurodegeneration in humans  
775 become perturbed in different ways during physiological aging in killifish. Such alterations  
776 might underlie convergent mechanisms between aging and mutations that increase the risk of  
777 neurodegeneration in old individuals.

778 Limitations of the study: (i) Our analyses are based on measurements performed on bulk brain  
779 tissue and, therefore, can be interpreted only as an average effect across different cell types  
780 and brain regions. In addition, phenomena occurring in rare cell populations might be missed  
781 by our analysis. (ii) Our findings are based on steady-state levels and do not allow us to  
782 estimate the impact of aging on the synthesis and degradation of transcript and protein  
783 directly. In the future, pulse-chase experiments performed *in vivo* using labeled nucleotides  
784 and amino acids could enable a more direct investigation of mRNA and protein turnover  
785 dynamics in aging. (iii) Some of our data lack spatial resolution, which could be critical to study  
786 highly specialized cells such as neurons and discern proteome differences between, e.g., cell  
787 body and synapses. (iv) Although we demonstrate that several aging phenotypes that we  
788 describe are conserved across species, we cannot exclude that some effects might be  
789 restricted to killifish and, therefore, not transferable to other species.

790

791

## 792 **Acknowledgments**

793 The authors gratefully acknowledge support from the FLI Core Facilities Proteomics,  
794 Sequencing, and the Fish Facility as well as the Stanford Genomics Facility. A.O. is supported  
795 by the German Research Council (Deutsche Forschungsgemeinschaft, DFG) via the  
796 Research Training Group ProMoAge (GRK 2155), the Else Kröner Fresenius Stiftung (award  
797 number: 2019\_A79), the Fritz-Thyssen Foundation (award number: 10.20.1.022MN), the  
798 Chan Zuckerberg Initiative Neurodegeneration Challenge Network (award numbers: 2020-  
799 221617, 2021-230967 and 2022-250618), and the NCL Stiftung. J.H.L. was supported by the  
800 National Institute on Aging of the National Institutes of Health under Award Number T32  
801 AG000266, and research by NIH grants GM05643319 and AG054407 to J.F. A.C. is supported  
802 by the German Research Council (Deutsche Forschungsgemeinschaft, DFG, award numbers  
803 CE 257/9-1 and CE 257/9-2), by Next Generation EU (PNRR), "Tuscany Health Ecosystem",  
804 THE project code ECS 00000017 and the Italian Ministry of University and Research (MUR)  
805 with the program "Joined research for Special Status Schools" PRO3. The content is solely  
806 the responsibility of the author(s) and does not necessarily represent the official views of the  
807 National Institutes of Health. The FLI is a member of the Leibniz Association and is financially  
808 supported by the Federal Government of Germany and the State of Thuringia.

809

## 810 **Author contributions**

811

812 Conceptualization: DDF, AM, JF, AC, AO

813 Data curation: DDF, AM, JHL, AKS, MT

814 Investigation: DDF, AM, JHL, EKS, MB, SB

815 Methodology: DDF, AM, JHL, EKS, MB, SB

816 Project administration: AO, AC

817 Data analysis: DDF, AM, JHL, PS, GS

818 Supervision: ETT, JG, JF, AC, AO

819 Visualization: DDF, AM, JHL, SB

820 Writing – original draft: DDF, AM, AO

821 Writing – review & editing: JHL, EKS, MB, SB, PS, AKS, GS, JF, AC

822

## 823 **Declaration of interest**

824

825 Authors declare no competing interests.

826

827

828

829

## 830 **Supplementary information**

831 **Figure S1:** Subcellular fractionation of the killifish aging brain by LOPIT-DC

832 **Figure S2:** Protein detergent insolubility changes in the killifish aging brain

833 **Figure S3:** Analysis of protein post-translational modifications in the killifish aging brain

834 **Figure S4:** Age-associated alterations of proteins linked to human neurodegenerative  
835 disorders

836 **Figure S5:** Proteome and transcriptome characterization of the killifish aging brain

837 **Figure S6:** Alterations of ribosomal and respiratory chain proteins

838 **Figure S7:** Effect of proteasome impairment on the killifish brain

839 **Figure S8:** Ribosome profiling in the killifish aging brain

840

841

842 **Table S1:** Proteome alterations in the aging brain. Data from LOPIT-DC experiment and  
843 proteome insolubility characterization

844 **Table S2:** Post-translational modification changes in the killifish aging brain

845 **Table S3:** Killifish orthologs of proteins associated with neurodegenerative disease in  
846 humans

847 **Table S4:** Proteome and transcriptome data and protein-transcript decoupling in the aging  
848 brain

849 **Table S5:** Proteasome impairment in the killifish aging brain. Tables for Proteome,  
850 Transcriptome and protein-transcript decoupling induced by the proteasome impairment  
851 treatment

852 **Table S6:** Ribosome-sequencing experiment in the killifish aging brain. Data for translation  
853 efficiency and ribosome pausing analysis

854 **Table S7:** Estimate of protein synthesis rate as a function of ribosome concentration  
855 decrease

856



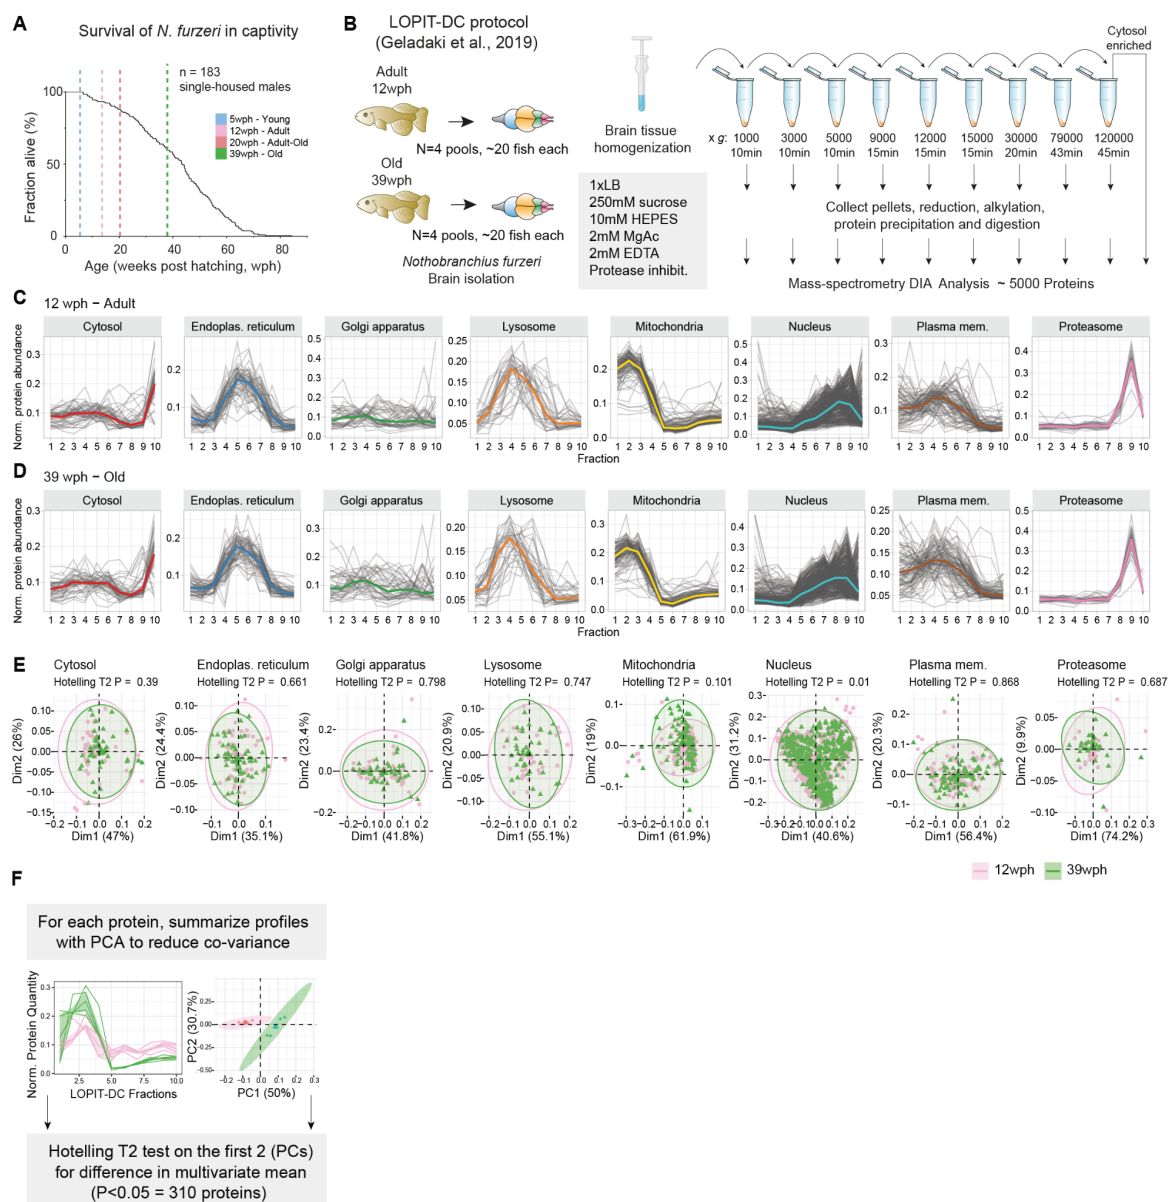

857  
858  
859  
860  
861  
862  
863  
864  
865  
866  
867  
868  
869  
870  
871  
872  
873  
874  
875  
876

**Figure S1: Subcellular fractionation of the killifish aging brain by LOPIT-DC.** A) Survival curves of *Nothobranchius furzeri* MZM-0410 strain in captivity (data from (Baumgart et al. 2016)). The survival of *Nothobranchius furzeri* was investigated by tracking the occurrence of deaths starting at the age of 5 weeks post-hatching (wph), which corresponds to sexual maturity. This study includes data from four age groups highlighted by vertical dashed lines. The analyzed strain was derived from the wild with a median lifespan of 7-8 months. B) Scheme of the LOPIT-DC experiment. The protocol was adapted to brain tissue from Geladaki et al. 2019; see methods for details. C-D) Organelle markers protein profiles from LOPIT-DC. The x-axis indicates the different fractions. The y-axis indicates protein abundance estimates derived from label-free Data Independent Acquisition mass spectrometry. Protein quantities were normalized by dividing the protein quantity in each fraction by the sum of the protein quantity along fractions. Each profile represents the median across replicates (N=4 pools). The median profiles of each organelle are highlighted by a colored solid line. Profiles obtained from adult (12 wph, panel C) and old (39 wph, panel D) fish are shown. E) Principal component analysis for different organelles markers in the LOPIT-DC fractions. Organelle markers from 12 wph (pink) and 39 wph (green) are shown. Each dot represents the median profile across (N=4 pools) replicate for each condition. F) Computational strategy used to identify age-related changes in protein sedimentation profiles. Related to Figure 1 and Table S1.

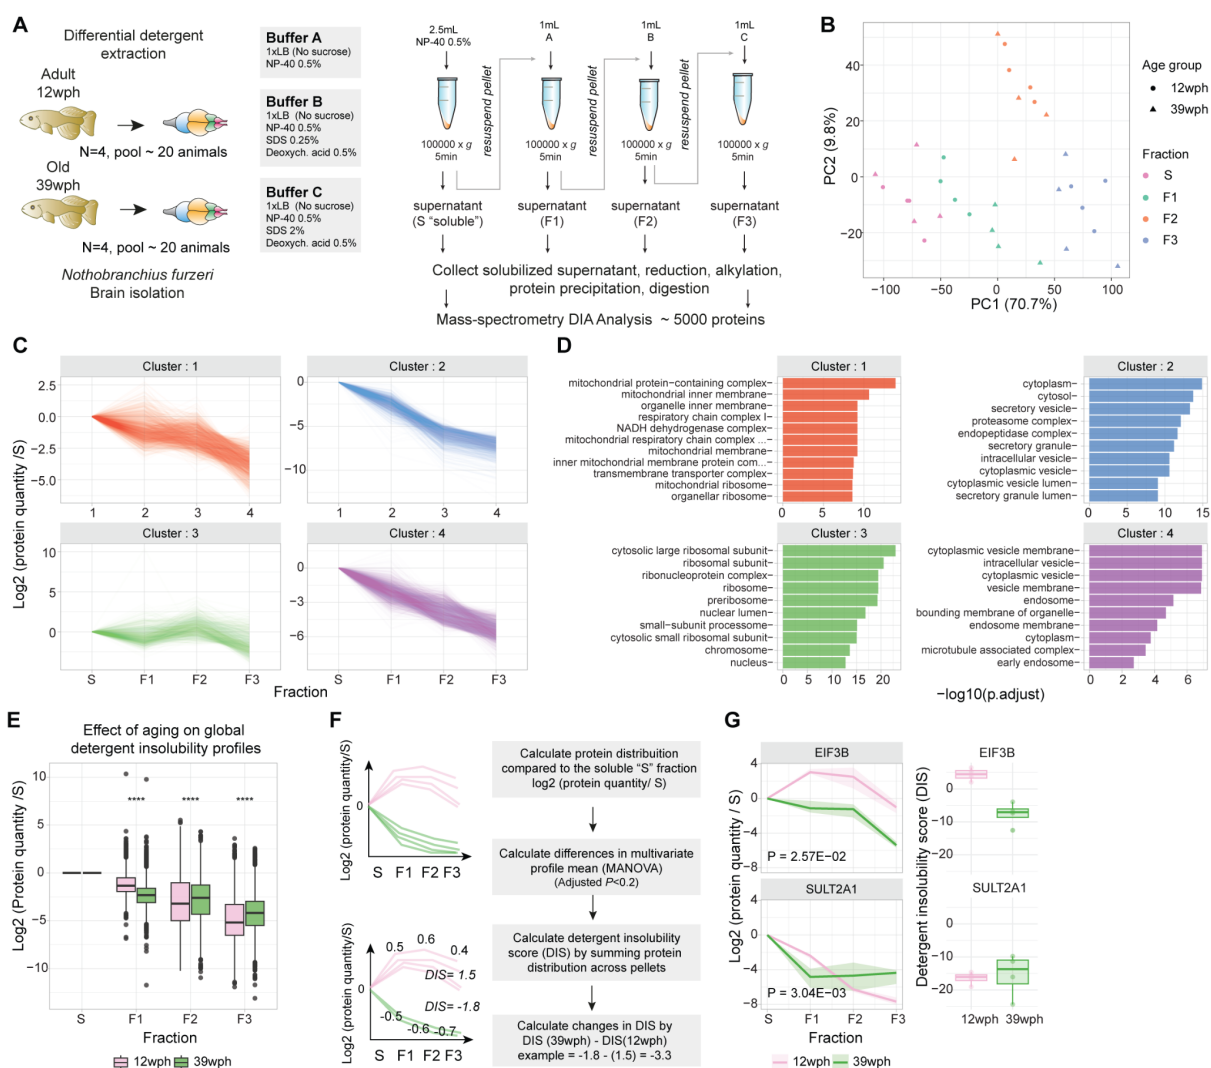

877

878 **Figure S2: Protein detergent insolubility changes in the killfish aging brain.** A) Scheme of the differential  
 879 detergent extraction experiment. The protocol was adapted to brain tissue from Tebbenkamp and Borchelt, 2009  
 880 (see methods). B) Principal component analysis based on proteomics data from fractions obtained by differential  
 881 detergent extraction. C) K-means clustering of detergent insolubility profiles. On the y-axis, the log2 protein quantity  
 882 relative to the soluble "S" fraction, each profile represents the median across both conditions and (N=4 pools)  
 883 replicates. D) GO enrichment overrepresentation analysis (ORA) of proteins assigned to each cluster against the  
 884 rest of the identified proteome. On the x-axis, the  $-\log_{10}$  of the adjusted P-value (Holm correction) of the Fisher's  
 885 Test is reported. Colors refer to the different clusters displayed in panel C. E) Boxplot depicting detergent insolubility  
 886 profiles for all the proteins quantified across age groups. The y-axis indicates the log2 transformed value of protein  
 887 quantity in each fraction relative to the soluble (S) fraction. Asterisks indicate the results of a two-sample Wilcoxon  
 888 test. F) Computational strategy used for calculating differences in detergent insolubility profile across age groups.  
 889 A MANOVA test was performed on each protein profile to detect significant changes in the multivariate mean  
 890 between 12 wph (adult) and 39 wph (old samples), N=4 pools per age group. The detergent insolubility score (DIS)  
 891 was calculated by summing the log2 protein quantity (relative to the soluble S fraction). Higher DIS indicate proteins  
 892 that are relatively more abundant in insoluble fractions (F1:F3) than the soluble one (S). G) Example profiles of top  
 893 hits proteins displaying changes in detergent insolubility with aging. EIF3B is an example of a protein that displays  
 894 decreased detergent insolubility with age, while SULT2A1 displays increased detergent insolubility with age. For  
 895 the left panel, the y-axis represents the log2 protein quantity in each fraction relative to the first soluble (S) fraction.  
 896 Dark lines indicate the median between replicates, while shaded areas represent 50% of the replicate distribution,  
 897 N=4 pools per age group. On the right panel, boxplots show the Detergent insolubility score (calculated as the sum  
 898 of the log2 protein quantity relative to the first soluble (S) fraction) for the same proteins. Related to Figure 1 and  
 899 Table S1. \* $P \leq 0.05$ ; \*\* $P \leq 0.01$ ; \*\*\* $P \leq 0.001$ ; \*\*\*\* $P \leq 0.0001$ .

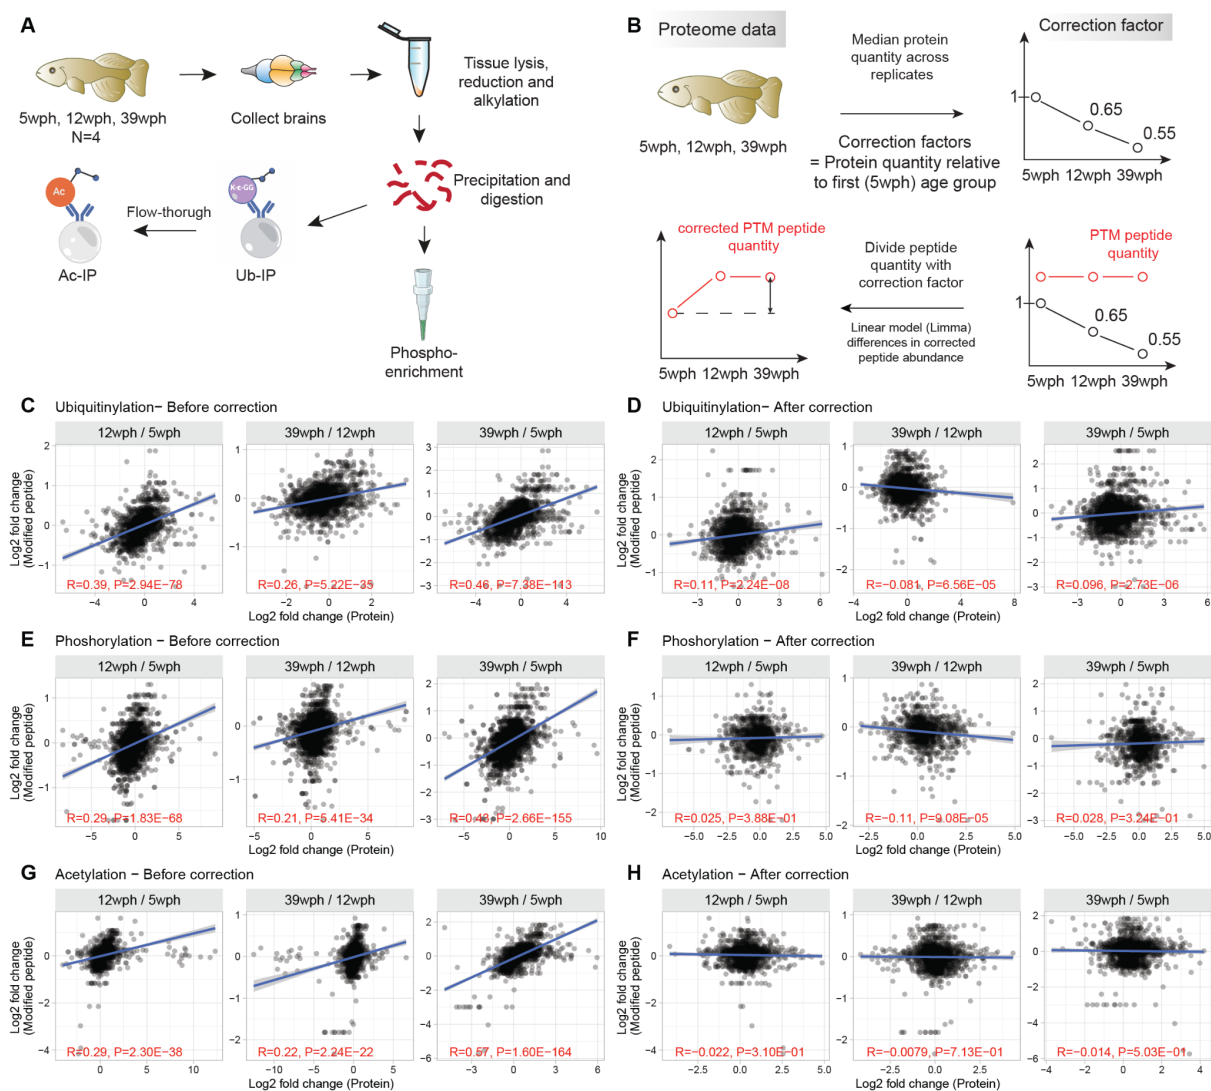

900

901 **Figure S3: Analysis of protein post-translational modifications in the killifish aging brain.** A) Workflow for  
 902 the enrichment of post-translational modified peptides from in killifish brain. B) Correction strategy for detecting  
 903 stoichiometric changes in post-translationally modified peptides. Correction factors were computed for each  
 904 protein and condition relative to the 5 wph (young) age group. Quantities of the modified peptides were divided by  
 905 the corresponding protein correction factor, and age-related changes were tested using *limma* (Ritchie et al.  
 906 2015). C-H) Relationship between age-related abundance changes of modified peptides vs. corresponding  
 907 protein, before (left panels) and after (right panels) correction. The red text indicates the test results for the  
 908 association between paired samples using Pearson's product-moment correlation coefficients. Related to Figure  
 909 1 and Table S2.

910

911

912

913

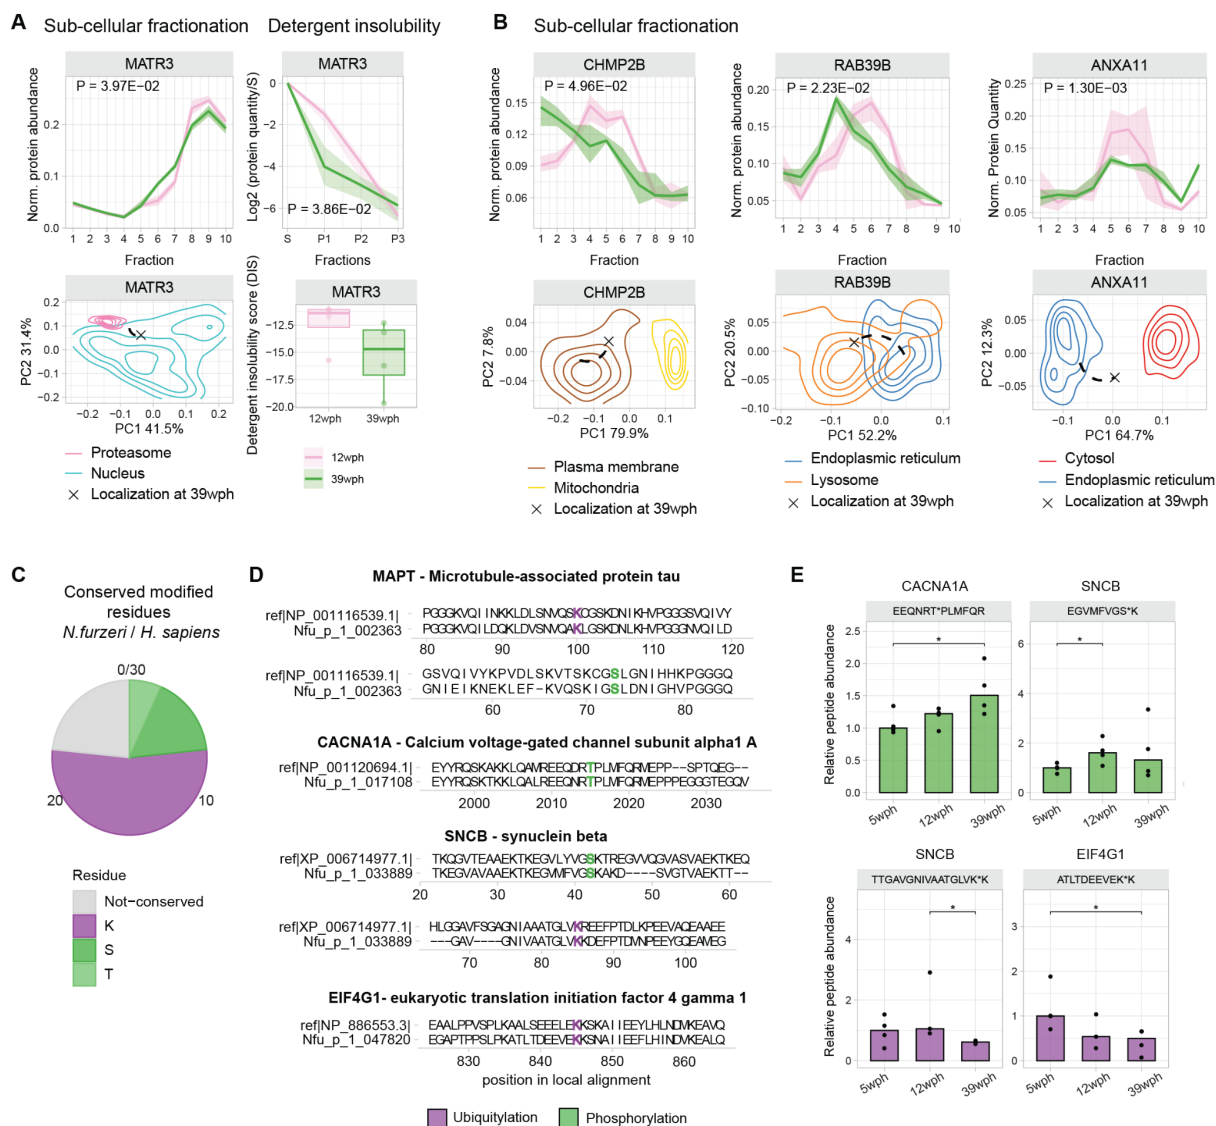

914  
915

**Figure S4: Age-associated alterations of proteins linked to human neurodegenerative disorders.**

A-B) Examples of proteins changing their subcellular localization profile or detergent insolubility. The top panels indicate either subcellular fractionation profiles (as in Figure 1D) or detergent insolubility profiles. For subcellular fractionation, in each of the plots, the x-axis indicates the 10 fractions obtained from LOPIT-DC and the y-axis indicates the total protein distribution along the 10 fractions for adult (12 wph, pink) and old (39 wph, green) fish. Shaded areas indicate 50% of the (N=4 pools) replicate distribution. P-values indicate the results of the Hotelling T2 test. For detergent insolubility profiles, the x-axis indicates the different detergent insolubility fractions: S=soluble, F1:F3=fractions after solubilization with buffers of increasing detergent strength (see methods, Figure S2A). The y-axis indicates log2 protein quantities relative to the soluble (S) fraction. The shaded area indicates 50% of the distribution across N=4 pools per age group. In the bottom panels, the PCA plot represents relocation for each protein. The contour line represents the density distribution of the different organelles (calculated as the median between 12 wph and 39 wph), and the position of the protein at 39 wph is highlighted with a cross. The organelles represented are the ones that possess the higher absolute changes in the log2 ratios between Euclidean distances from the protein in the two age groups. Only for panel A, the boxplot on the right side indicates the detergent insolubility score in the two age groups. C) Pieplot showing conserved modified residues between *Nothobranchius furzeri* and humans that display changes in abundance with aging. Data refers to proteins involved in neurodegenerative diseases in humans. D) Local sequence alignments between *Nothobranchius furzeri* proteins (bottom sequence) and best human BLAST hit (upper sequence) for different proteins involved in neurodegenerative diseases. Modified residues are highlighted in purple (ubiquitylation) and green (phosphorylation). E) Barplots displaying significantly changing ( $P < 0.05$ , moderated Bayes T-test) of modified peptides for the proteins shown in panel D. Asterisks indicate the P-value of the moderated Bayes T-test (N=3-4).

937 The values represent relative abundances to the young (5 wph) age group after correction for protein changes (see  
938 methods, Figure S3B). Related to Figure 1 and Table S3.  
939  
940  
941  
942  
943  
944  
945  
946  
947  
948  
949  
950  
951  
952  
953  
954  
955  
956  
957  
958  
959  
960  
961  
962  
963  
964  
965  
966

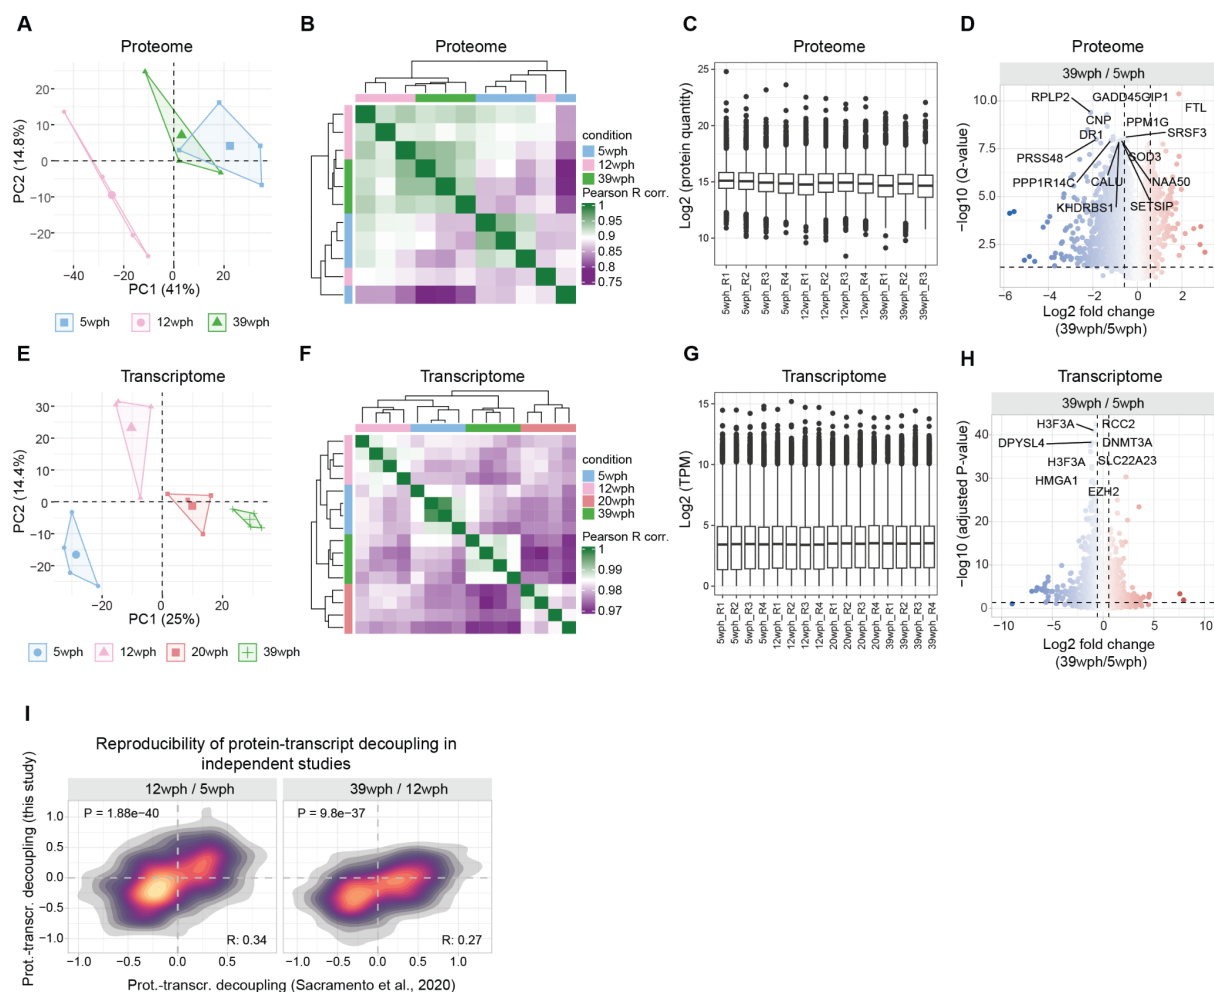

967

968

969

970

971

972

973

974

975

976

977

978

979

980

981

982

983

984

985

986

987

988

**Figure S5: Proteome and transcriptome characterization of the killfish aging brain.** A) Principal component analysis of proteomics data. B) Correlation heatmap between samples from the aging brain proteome data. Pairwise Pearson's R correlation coefficient was calculated on the log2 transformed protein abundances. C) Boxplot displaying the distribution of log2 transformed and normalized protein abundances. D) Volcano plot highlighting significant protein abundance changes in the aging brain (39 wph vs. 5 wph). Dashed lines indicate the threshold used to select differentially abundant proteins (absolute log2 FC > 0.58 and -log10 Q-value < 0.05). E) Principal component analysis of transcriptomics data. F) Correlation heatmap between samples from the aging brain transcriptome data. Pairwise Pearson's R correlation coefficient was calculated on the log2 transformed transcript per million reads (TPM). G) Boxplot displaying the distribution of log2 transformed and normalized transcript counts (TPM). H) Volcano plot highlighting significant transcript abundance changes in the aging brain (39 wph vs 5 wph). Dashed lines indicate the threshold used to select differentially expressed genes (absolute log2 FC > 0.58 and -log10 Adjusted P-value < 0.05). For displaying purposes, the X-axis range was limited to a -10:10 range leading to the exclusion of 1 gene. I) 2-D density plot showing the correlation between protein-transcript decoupling during aging in this study, displayed on the y-axis, and protein-transcript decoupling described in Sacramento et al., (2020) (x-axis). Related to Figure 2 and Table S4.

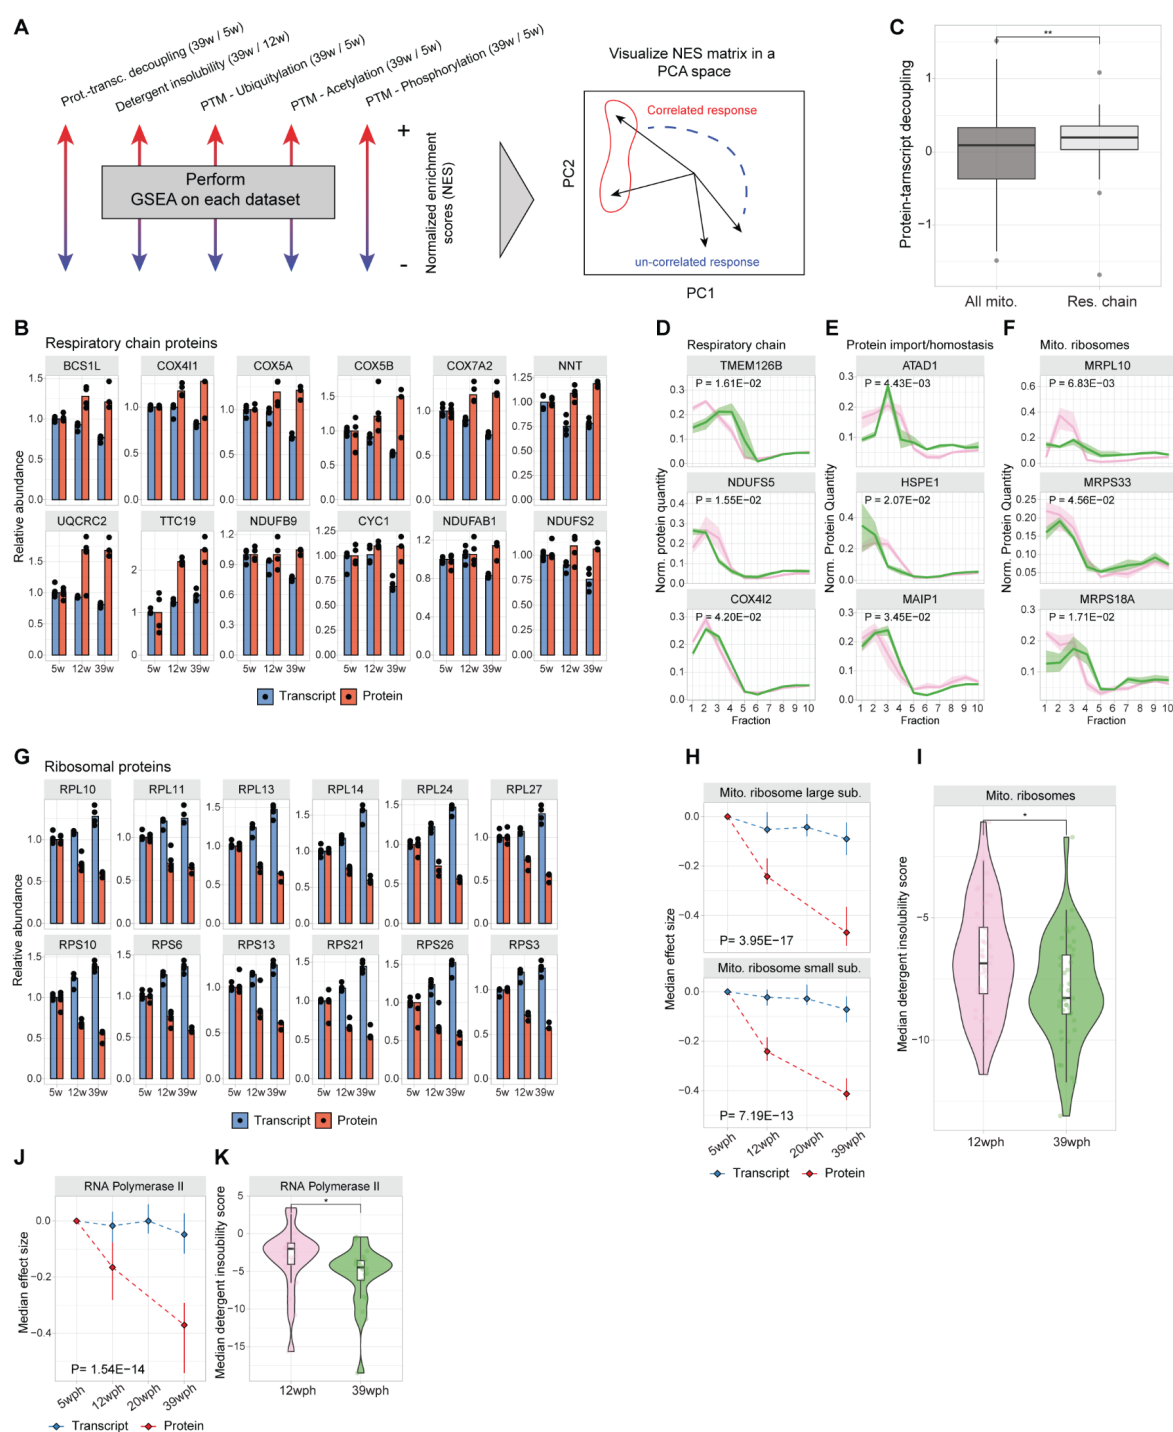

989  
990  
991  
992  
993  
994  
995  
996  
997  
998  
999  
1000  
1001  
1002

**Figure S6: Alterations of ribosomal and respiratory chain proteins.** A) Scheme of data integration strategy. For each dataset, a gene set enrichment analysis (GSEA) was performed using GO terms for cellular components. The normalized enrichment scores (NES) from each dataset were combined in a matrix and used as input for principal component analysis. B) Barplot showing transcript and protein abundances for oxidative phosphorylation protein. All the values were normalized to the 5 wph (young) age group (set to 1), N=3-4. C) Boxplot depicting the distribution of protein-transcript decoupling values (as defined in Figure 2A) for oxidative phosphorylation (light gray) proteins against the rest of the mitochondrial proteome (dark gray). Asterisks indicate the results of a two-sample Wilcoxon test. D-F) Examples of mitochondrial proteins that display changes in subcellular fractionation with aging. The x-axis indicates the 10 fractions obtained from LOPIT-DC, and the y-axis indicates the total protein distribution along the 10 fractions for adult (12 wph, pink) and old (39 wph, green) animals. Shaded areas indicate 50% of the replicate distribution from N=4 pools per group. P-values indicate the results of the Hotelling T2 test. G) Barplot showing transcript and protein abundances for cytoplasmic ribosomal protein. All the values were

1003 normalized to the 5 wph (young) age group (set to 1), N=3-4. H) Line plot showing the trajectories for transcriptome  
1004 (blue) and proteome (red) of mitochondrial large and small ribosomal subunits. Each point summarizes the median  
1005 distribution of the log<sub>2</sub> ratio of the quantities relative to the first (5 wph) age group, while the line bars indicate 50%  
1006 of the distributions. P-values indicate the results of a MANOVA test run on the two multivariate distributions, N=3-  
1007 4. I) Violin plot displaying detergent insolubility score for proteins of the mitochondrial ribosome (GO:0005761).  
1008 Each dot represents the median insolubility score of each protein across N=4 pools per age group; asterisks  
1009 indicate the results of a two-sample Wilcoxon test. J) Line plot showing the trajectories for transcriptome (blue) and  
1010 proteome (red) for RNA Polymerase II enzyme. Each point summarizes the median distribution of the log<sub>2</sub> ratio of  
1011 the quantities relative to the first (5 wph) age group, while the line bars indicate 50% of the distributions. P-values  
1012 indicate the results of a MANOVA test run on the two multivariate distributions, N=3-4. K) Violin plot displaying  
1013 detergent insolubility score for proteins of the RNA Polymerase II enzyme (GO:0016591). Each dot represents the  
1014 median insolubility score of each protein across N=4 pools per age group; asterisks indicate the results of a two-  
1015 sample Wilcoxon test. \*P ≤ 0.05; \*\*P ≤ 0.01, \*\*\*P ≤ 0.001, \*\*\*\*P ≤ 0.0001. Related to Figure 3.



1016

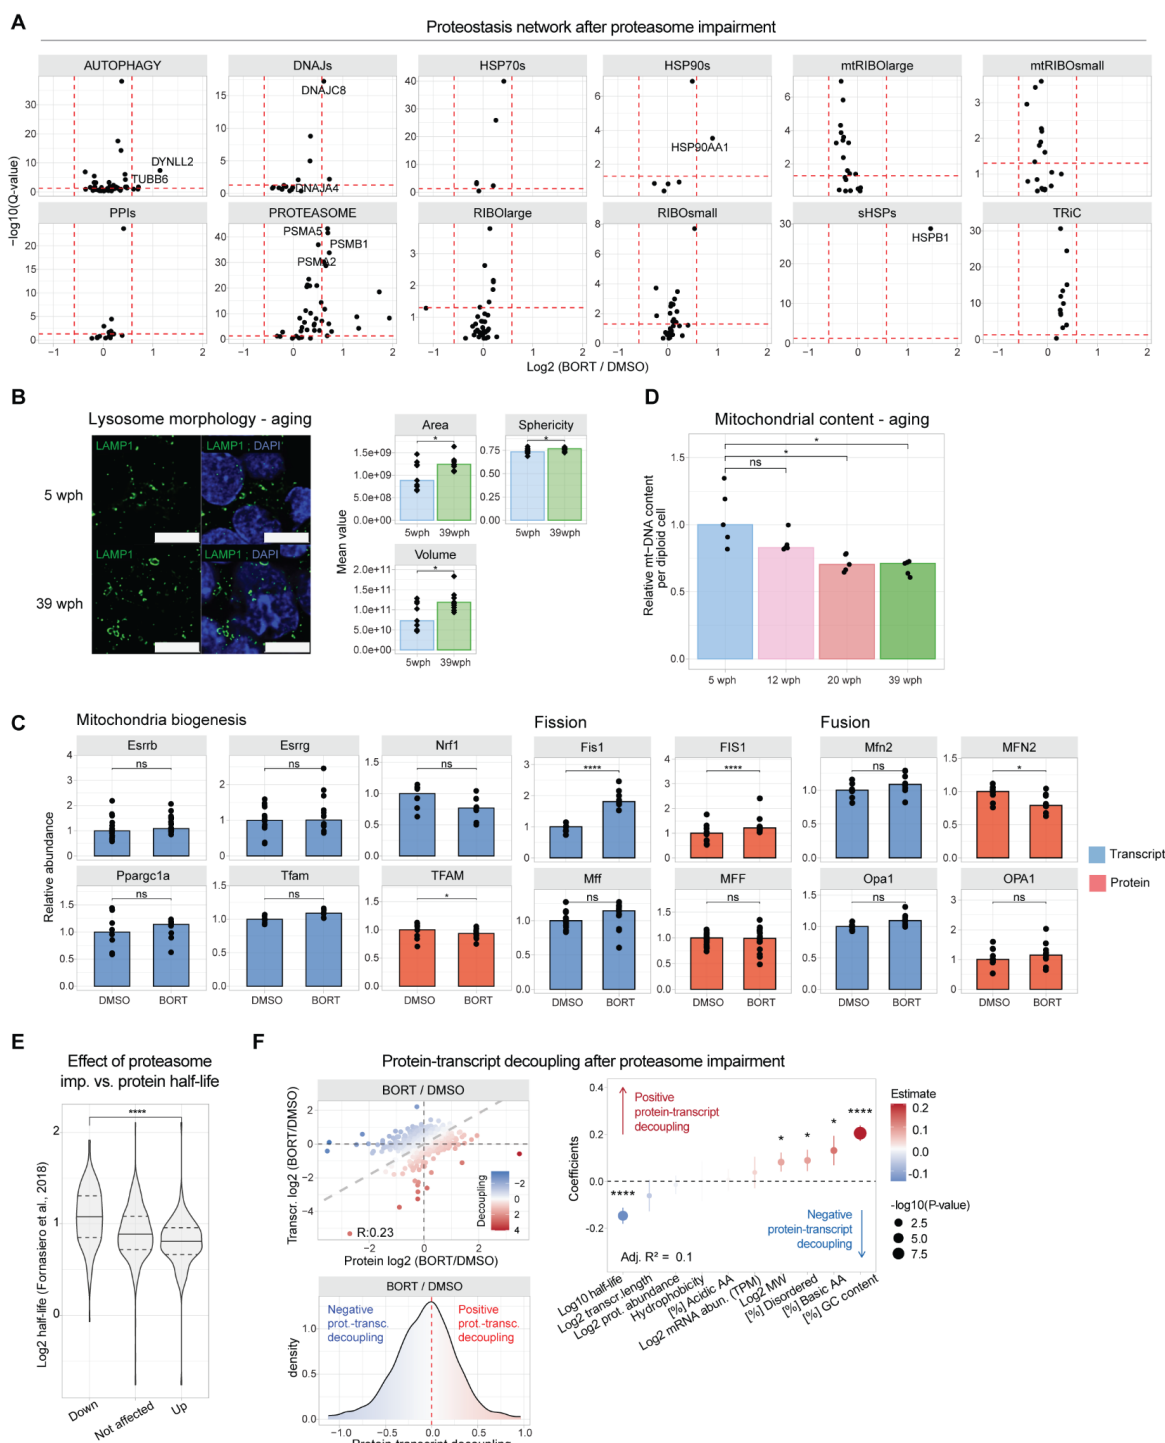

1017

1018

1019

1020

1021

1022

1023

1024

1025

1026

1027

1028

**Figure S7: Effect of proteasome impairment on the killifish brain.** A) Protein abundance changes induced by proteasome impairment for different components of the proteostasis network. B) (Right panel) Immunofluorescence stainings for lysosome (LAMP1) in brain cryo-sections of young (light blue) and old (green) *Nothobranchius furzeri*. Scale bars = 5µm. (Left panel) Barplot representation of lysosome morphology features in young (light blue) and old (green) samples. The y-axis represents the mean value of the different morphology features in each of the replicates (N=6). C) Effect of proteasome impairment on mitochondrial transcripts and proteins. For protein data, asterisks indicate the Q-value of the differential abundance testing performed with a two-sample T-test on the peptide abundances. For transcript data, asterisks indicate the Adjusted P-value of the differential abundance testing. N=10. D) Quantification of mitochondrial DNA (mt-DNA) from killifish brains during aging. Relative mtDNA copy number was calculated using real-time quantitative PCR with primers for 16S rRNA mitochondrial gene and

1029 Cdkn2a/b nuclear gene for normalization (N=5). Asterisks indicate the results of two-sample Wilcoxon tests. E)  
1030 Violin plot showing the distribution of up and down-regulated proteins in response to proteasome impairment  
1031 against their half-life as quantified in Fornasiero et al., 2018. Asterisks indicate the results of a two-samples  
1032 Wilcoxon test. F) (Top left panel) Scatterplot comparing protein- (x-axis) and transcript-level (y-axis) fold changes  
1033 in killifish after treatment with bortezomib. The color of each dot represents the decoupling score calculated as the  
1034 difference between log<sub>2</sub> transformed fold changes measured at the protein and transcript levels. Grey dashed lines  
1035 indicate the equal changes between transcript and protein and, therefore, a zero decoupling score. (Bottom left  
1036 panel) Density distribution of decoupling scores for comparing bortezomib vs. DMSO. On the right part, highlighted  
1037 in red, are protein “gain” events (increase in protein abundance compared to the transcript), while on the left, in  
1038 blue, are protein “loss” events (decrease in protein abundance compared to the transcript). (Right panel) Multiple  
1039 linear regression analysis of decoupling scores in response to proteasome impairment based on biophysical  
1040 features of transcripts or proteins as predictors. The x-axis indicates the estimate of the regression coefficient for  
1041 each feature, while the size of the dots and asterisks represent the -log<sub>10</sub> P-values of the F-test. \*P ≤ 0.05; \*\*P ≤  
1042 0.01, \*\*\*P ≤ 0.001, \*\*\*\*P ≤ 0.0001. Related to Figure 4 and Table S5.

1043  
1044  
1045  
1046  
1047  
1048  
1049  
1050  
1051  
1052  
1053  
1054

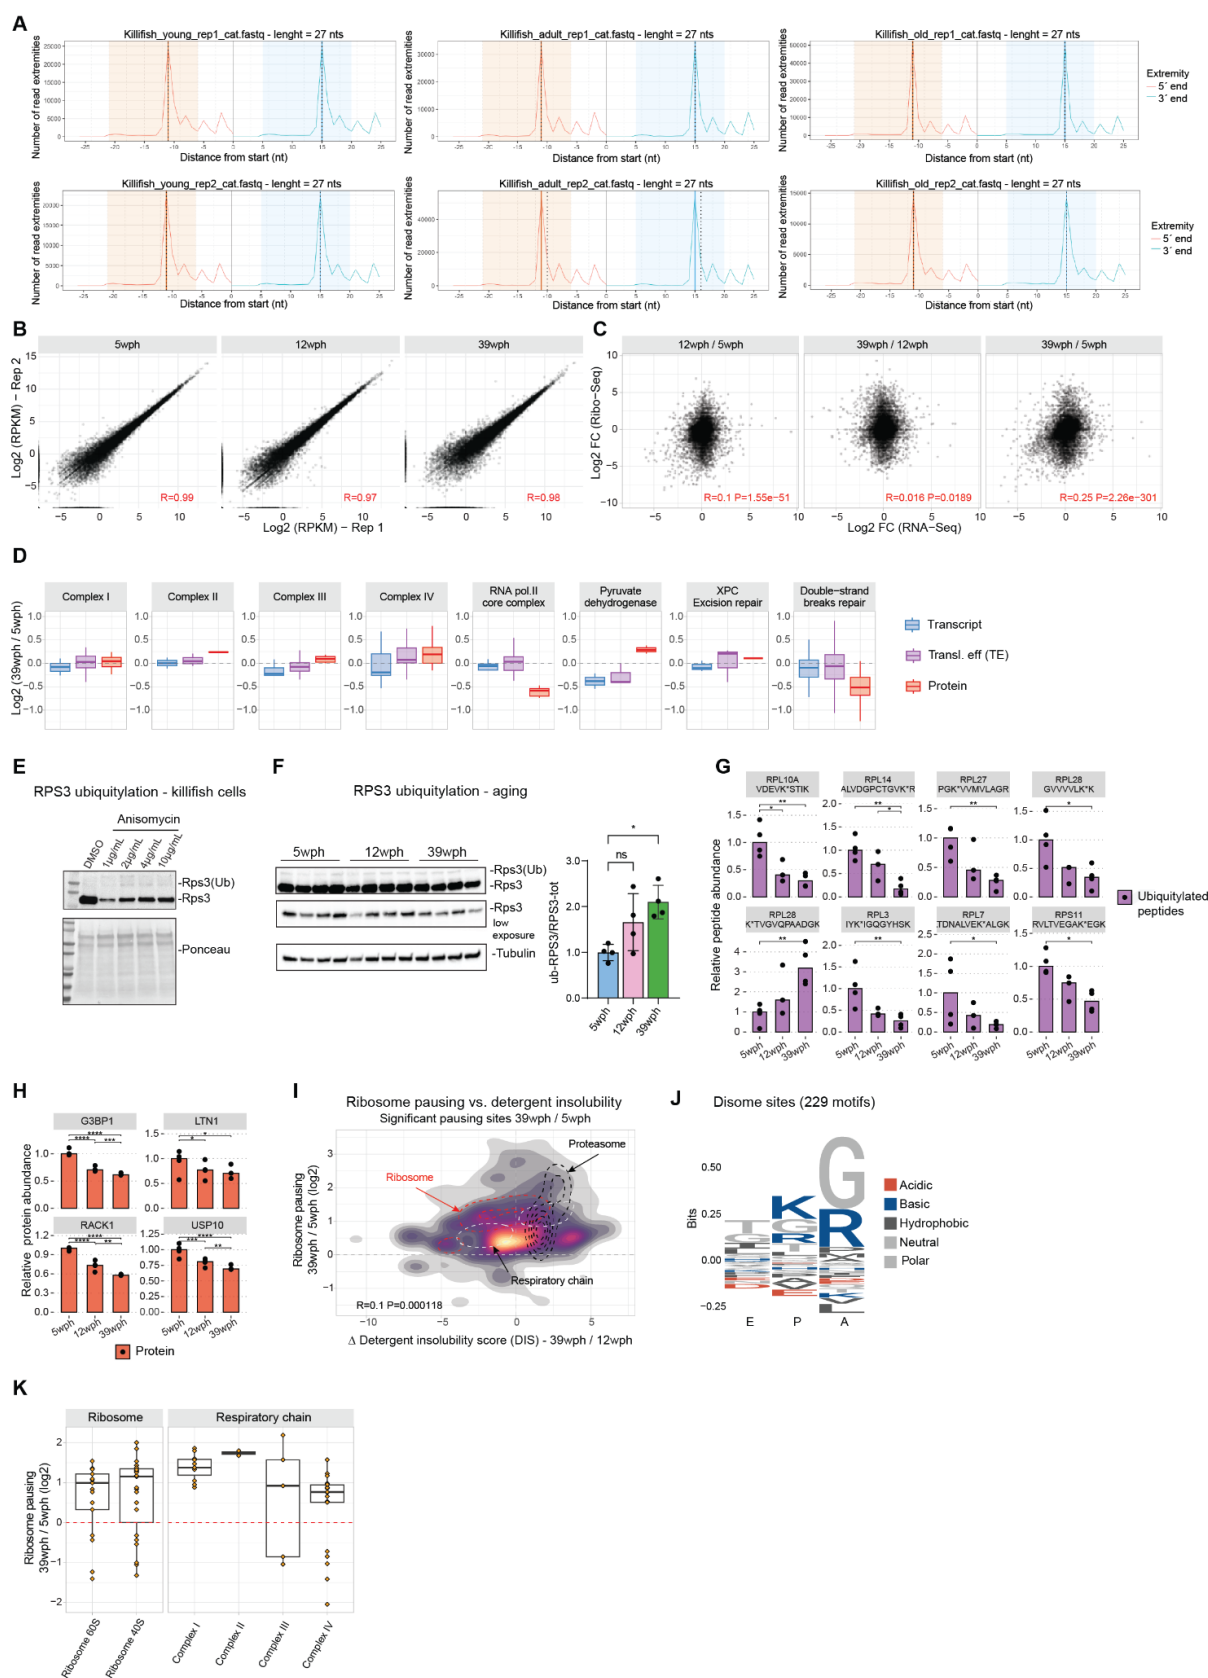

1055  
1056  
1057  
1058  
1059  
1060  
1061

**Figure S8: Ribosome profiling in the killifish aging brain.** A) Tri-nucleotide plot showing characteristic triplet periodicity. The x-axis represents the distance from the starting codon (in nucleotide) and the y-axis the number of reads. B) Scatterplot showing the correlation between replicates for the Ribo-Seq experiment. On the different axis, the log<sub>2</sub>(RPKM) values from the different replicates are shown. C) Scatterplot showing the correlation between log<sub>2</sub> fold changes for ribosome occupancy (y-axis) and changes in the transcriptome (x-axis) for different aging steps. D) Boxplot displaying differential modes of regulation for different protein complexes. On the x-axis are

1062 displayed the different datasets: Transcriptome (green), Translation efficiency (purple), and Proteome (red). E) Immunoblot to detect RPS3 ubiquitylation in killifish cells treated with Anisomycin, which inhibits translation elongation and causes ribotoxic stress (Iordanov et al. 1997) for 24 hours. F) Immunoblot to detect RPS3 ubiquitylation across age groups. Barplot shows the ratio between the total RPS3 and its ubiquitylated fraction during aging. Asterisks indicate the results of an ordinary one-way ANOVA test (N=4). G) Barplots displaying significantly changing ( $P < 0.05$ , moderated Bayes T-test) of ubiquitin-modified peptides for ribosomal proteins. Asterisks indicate the P-value of the moderated Bayes T-test (N=3-4). The values represent relative abundances to the young (5 wph) age group after correction for protein changes (see methods, Figure S3B). H) Barplot showing normalized protein abundance (relative to the first, 5 wph, age group set to 1) for factors associated with Ribosome-Quality-Control (RQC) pathways. The y-axis represents protein abundances relative to the first (5 wph) age groups. Asterisks indicate the Q-value of the differential abundance testing performed with a two-sample T-test on the peptide abundances, N=3,4 pools per group. I) 2-D density plot showing the relation between significant changes in pausing (Adjusted P-value  $< 0.05$ ) displayed on the y-axis and changes in detergent insolubility metrics (x-axis). Each point in the distribution represents a significantly altered pausing site. Contour lines indicate the distribution of cytoplasmic ribosomes (red), Proteasome (black), and oxidative phosphorylation (white). J) Weblogo for disome pausing sites that display a strong increase in pausing (Pause score  $> 10$ ). The y-axis displays the relative frequencies of the different residues, while the x-axis displays the different ribosome positions (E, P, A). K) Boxplot showing the distributions of pausing sites for cytoplasmic ribosomes (left panel) and respiratory chain complexes (right). Each dot represents a significantly altered (Adjusted P-value  $< 0.05$ ) pausing site. The Y axis represents the log<sub>2</sub> fold changes in pausing between 39 wph and 5 wph. \* $P \leq 0.05$ ; \*\* $P \leq 0.01$ , \*\*\* $P \leq 0.001$ , \*\*\*\* $P \leq 0.0001$ . Related to Figure 5 and Table S6.

1083

1084

1085

1086

## 1087 **Materials and methods**

1088

### 1089 **Animal management practices**

1090 All experiments were performed in accordance with relevant guidelines and regulations. Fish  
1091 were bred and kept in FLI's fish facility according to §11 of the German Animal Welfare Act  
1092 under license number J-003798. The animal experiment protocols were approved by the local  
1093 authority in the State of Thuringia (Veterinaer- und Lebensmittelueberwachungsamt;  
1094 proteasome impairment: reference number 22-2684-04-FLI-19-010). Sacrifice and organ  
1095 harvesting of non-experimental animals were performed according to §4(3) of the German  
1096 Animal Welfare Act.

1097

### 1098 ***In vivo* proteasome impairment**

1099 Adult animals (12–14 wph) were subjected to pharmacological intervention via intraperitoneal  
1100 injections (IP) during a 4-weeks period of treatment. On each of the sixth day ( $t = 0$ ,  $t = 6$  d,  $t$   
1101  $= 12$ d,  $t = 18$ d,  $t = 24$ d), fish were anesthetized with 200 mg/l buffered MS-222 (PharmaQ)  
1102 and gently manipulated to deliver IP of Bortezomib at 500  $\mu$ M or vehicle (1% DMSO in a  
1103 physiological salt solution) at a dosage of 10  $\mu$ l/g body weight. Animals from the same hatch  
1104 were randomly allocated to the experimental groups. Both male and female fish were included  
1105 in each experimental group. Individual brains from the fish were collected on the last day of  
1106 treatment and snap-frozen in liquid nitrogen.

1107

### 1108 **Proteasome activity assay**

1109 CT-L (chymotrypsin-like) proteasome activity was assayed with the hydrolysis of a specific  
1110 fluorogenic substrate, Suc-LLVY-AMC (UBPBio, Catalog Number G1100). On the day of the  
1111 experiment, brains were lysed in buffer (50 mM HEPES, pH 7.5 (Sigma Aldrich, H3375); 5 mM  
1112 EDTA (Carl Roth, 8043.2); 150 mM NaCl (Carl Roth, 3957.1); 1 % (v/v) Triton X-100 (Carl  
1113 Roth, 3051.3); 2 mM ATP (Sigma Aldrich, A2383) prepared with Milli-Q water) to a final  
1114 estimated protein concentration of  $\sim 4$  mg/mL and homogenized by sonication (Bioruptor Plus)  
1115 for 10 cycles (30 sec ON/60 sec OFF) at high setting, at 4°C. Lysates corresponding to 10  $\mu$ g  
1116 protein were incubated in 50 mM Tris-HCl, pH 7.4, 5 mM MgCl<sub>2</sub>, 1 mM ATP, 1 mM DTT, 10%  
1117 glycerol, and 10  $\mu$ M proteasome substrate for 1 h at 37 °C. Specific proteasome activity was  
1118 determined as the difference between the total activity of protein extracts and the remaining  
1119 activity in the presence of 20  $\mu$ M MG132 (Enzo Life Sciences, BML-PI102-0005).  
1120 Fluorescence was measured by multiple reads for 60 min at 37°C by TECAN Kinetic Analysis  
1121 (excitation 380 nm, emission 460 nm, read interval 5 min) on a Safire II microplate reader  
1122 (TECAN).

1123

### 1124 **Sample preparation for total proteome and analysis of PTMs**

1125 Snap-frozen brains were thawed and transferred into Precellys® lysing kit tubes (Keramik-kit  
1126 1.4/2.8 mm, 2 ml (CKM)) containing 150  $\mu$ l of PBS supplemented with cOmplete™, Mini,  
1127 EDTA-free Protease Inhibitor (Roche,11836170001) and with PhosSTOP™ Phosphatase  
1128 Inhibitor (Roche, 4906837001). Based on estimated protein content (5% of fresh tissue  
1129 weight), three to six brains were pooled to obtain  $\sim 1.5$  mg of protein extract as starting material  
1130 for each biological replicate. Tissues were homogenized twice at 6000 rpm for 30 s using  
1131 Precellys® 24 Dual (Bertin Instruments, Montigny-le-Bretonneux, France), and the  
1132 homogenates were transferred to new 2 ml Eppendorf tubes. Proteins were quantified using  
1133 Pierce™ BCA Protein Assay Kit (Thermo Scientific, 23225), and 1.25 mg was processed for

1134 further analysis. Volumes were adjusted using PBS and one-fourth of the volume equivalent  
1135 of the 4× lysis (8% SDS, 100 mM HEPES, pH8) buffer was added. Samples were sonicated  
1136 twice in a Bioruptor Plus for 10 cycles with 1 min ON and 30 s OFF with high intensity at 20 °C.  
1137 The lysates were centrifuged at 18,407 xg for 1 min and transferred to new 1.5 ml Eppendorf  
1138 tubes. Subsequently, samples were reduced using 10 mM DTT (Carl Roth, 6908) for 15 min  
1139 at 45 °C and alkylated using freshly made 200 mM iodoacetamide (IAA) (Sigma-Aldrich, I1149)  
1140 for 30 min at room temperature in the dark. An aliquot of each lysate was used for estimating  
1141 the precise protein quantity using BCA (Thermo Scientific, 23225). Subsequently, proteins  
1142 were precipitated using cold acetone, as described in (Buczak et al. 2020), and resuspended  
1143 in 500 µl of digestion buffer (3 M urea, 100 mM HEPES pH 8.0). Aliquots corresponding to 20,  
1144 200, and 1000 µg protein were taken for proteome, phosphopeptides, and  
1145 ubiquitylated/acetylated peptides enrichment, respectively, and digested using LysC 1:100  
1146 enzyme:proteins ratio for 4 hours (Wako sequencing grade, 125-05061) and trypsin 1:100  
1147 enzyme:proteins ratio for 16 hours (Promega sequencing grade, V5111). The digested  
1148 proteins were then acidified with 10% (v/v) trifluoroacetic acid and desalted using Waters  
1149 Oasis® HLB µElution Plate 30 µm (2, 10, and 30 mg, depending on the amount of starting  
1150 material) following manufacturer instructions. The eluates were dried down using a vacuum  
1151 concentrator and reconstituted in MS buffer A (5% (v/v) acetonitrile, 0.1% (v/v) formic acid).  
1152 For PTM enrichment, peptides were further processed as described below. For Data  
1153 Independent Acquisition (DIA) based analysis of total proteome, samples were transferred to  
1154 MS vials, diluted to a concentration of 1 µg/µL, and spiked with iRT kit peptides (Biognosys,  
1155 Ki-3002-2) prior to analysis by LC-MS/MS.

1156

### 1157 **Sequential enrichment of ubiquitylated and acetylated peptides**

1158 Ubiquitylated and acetylated peptides were sequentially enriched starting from ~1000 µg of  
1159 dried peptides per replicate. For the enrichment of ubiquitylated peptides, the PTMScan® HS  
1160 Ubiquitin/SUMO Remnant Motif (K-ε-GG) kit (Cell Signaling Technology, 59322) was used  
1161 following manufacturer instructions. The K-ε-GG modified enriched fraction was desalted and  
1162 concentrated as described above, dissolved in MS buffer A, and spiked with iRT kit peptides  
1163 prior to LC-MS/MS analysis.

1164 The flowthrough fractions from the K- ε -GG enrichment were acidified with 10% (v/v)  
1165 trifluoroacetic acid and desalted using Oasis® HLB µElution Plate 30 µm (30 mg) following  
1166 manufacturer instructions. Acetylated peptides were enriched as described by Di Sanzo et al.  
1167 2021. Briefly, dried peptides were dissolved in 1000 µl of IP buffer (50 mM MOPS pH 7.3,  
1168 10 mM KPO<sub>4</sub> pH 7.5, 50 mM NaCl, 2.5 mM Octyl β-D-glucopyranoside) to reach a peptide  
1169 concentration of 1 µg/µL, followed by sonication in a Bioruptor Plus (5 cycles with 1 min ON  
1170 and 30 s OFF with high intensity at 20 °C). Agarose beads coupled to an antibody against  
1171 acetyl-lysine (ImmuneChem Pharmaceuticals Inc., ICP0388-5MG) were washed three times  
1172 with washing buffer (20 mM MOPS pH 7.4, 10 mM KPO<sub>4</sub> pH 7.5, 50 mM NaCl) before  
1173 incubation with each peptide sample for 1.5 h on a rotating well at 750 rpm (STARLAB Tube  
1174 roller Mixer RM Multi-1). Samples were transferred into Clearspin filter microtubes (0.22 µm)  
1175 (Dominique Dutscher SAS, Brumath, 007857ACL) and centrifuged at 4 °C for 1 min at 2000  
1176 xg. Beads were washed first with IP buffer (three times), then with washing buffer (three times),  
1177 and finally with 5 mM ammonium bicarbonate (three times). Thereupon, the enriched peptides  
1178 were eluted first in basic condition using 50 mM aqueous NH<sub>3</sub>, then using 0.1% (v/v)  
1179 trifluoroacetic acid in 10% (v/v) 2-propanol and finally with 0.1% (v/v) trifluoroacetic acid.  
1180 Elutions were dried down and reconstituted in MS buffer A (5% (v/v) acetonitrile, 0.1% (v/v)  
1181 formic acid), acidified with 10% (v/v) trifluoroacetic acid, and then desalted with Oasis® HLB

1182  $\mu$ Elution Plate 30  $\mu$ m. Desalted peptides were finally dissolved in MS buffer A, spiked with iRT  
1183 kit peptides and analyzed by LC-MS/MS.

1184

### 1185 **Enrichment of phosphorylated peptides**

1186 Lysates (corresponding to ~200  $\mu$ g of protein extract) were acetone precipitated, digested into  
1187 peptides, and desalted, as described in “Sample preparation for total proteome and analysis  
1188 of PTMs”. The last desalting step was performed using 50  $\mu$ l of 80% ACN and 0.1% TFA  
1189 buffer solution. Before phosphopeptide enrichment, samples were filled up to 210  $\mu$ l using  
1190 80% ACN and 0.1% TFA buffer solution. Phosphorylated peptides were enriched using Fe(III)-  
1191 NTA cartridges (Agilent Technologies, G5496-60085) in an automated fashion using the  
1192 standard protocol from the AssayMAP Bravo Platform (Agilent Technologies). In short, Fe(III)-  
1193 NTA cartridges were first primed with 100  $\mu$ l of priming buffer (100% ACN, 0.1% TFA) and  
1194 equilibrated with 50  $\mu$ L of buffer solution (80% ACN, 0.1% TFA). After loading the samples into  
1195 the cartridge, the cartridges were washed with an OASIS elution buffer, while the syringes  
1196 were washed with a priming buffer (100% ACN, 0.1% TFA). The phosphopeptides were eluted  
1197 with 25  $\mu$ L of 1% ammonia directly into 25  $\mu$ L of 10% FA. Samples were dried down with a  
1198 speed vacuum centrifuge and stored at -20 °C until LC-MS/MS analysis.

1199

### 1200 **Subcellular fraction of killifish brain by LOPIT-DC**

1201 All the following steps were performed at 4°C, keeping samples on ice unless stated otherwise.  
1202 Fresh brains from adult (12 wph) and old (39 wph) killifish were pooled to reach ~150 mg of  
1203 wet tissue weight per biological replicate. A mixture of male and female fish was used. Fresh  
1204 brain tissue was subsequently transferred to a 15 mL Potter homogenizer (Fisher Scientific,  
1205 15351321) together with 7.5 mL of lysis buffer (LB) (250 mM sucrose, 10 mM HEPES ph 8.0,  
1206 2 mM MgAc, 2 mM EDTA) supplemented with Protease Inhibitor (Roche, 11836170001) and  
1207 homogenized with ~60 gentle strokes. The brain homogenate was then transferred in a 15mL  
1208 Falcon tube and treated with Benzonase (Merk, 70664) for 20 min at room temperature. An  
1209 aliquot of 2.5 mL homogenate was collected for each sample and stored at -80°C to be later  
1210 processed for differential detergent extraction (see below). The remaining 5 mL were  
1211 transferred to a 5 mL Eppendorf tube and centrifuged at 500 xg for 5 min at 4°C to remove  
1212 cell debris and unlysed cells. Subsequently, the clarified homogenate was centrifuged at 1000  
1213 xg for 13 min at 4°C and the resulting pellet was collected as the first subcellular fraction (01).  
1214 Following one additional centrifugation at 1000 xg for 7 minutes, the supernatant was then  
1215 divided into 4 x 1.5 mL Ultracentrifuge Tubes (Beckman) and processed for differential  
1216 ultracentrifugation step with an Optima TLX-BenchTop Ultracentrifuge (Beckman, 8043-30-  
1217 1197), using a TLA55 rotor (Beckman, 366725), using the following ultracentrifugation  
1218 settings:

1219

1220

1221

1222

1223

1224

1225

1226

1227

1228

| <i>yg</i> | <i>Time</i> | <i>Fraction</i>                          | <i>Temperature</i> |
|-----------|-------------|------------------------------------------|--------------------|
| 3000      | 10'         | 02                                       | 4°C                |
| 5000      | 10'         | 03                                       | 4°C                |
| 9000      | 15'         | 04                                       | 4°C                |
| 12000     | 15'         | 05                                       | 4°C                |
| 15000     | 15'         | 06                                       | 4°C                |
| 30000     | 20'         | 07                                       | 4°C                |
| 79000     | 43'         | 08                                       | 4°C                |
| 120000    | 45'         | 09                                       | 4°C                |
| —         | —           | 10 (final supernatant, cytosol enriched) |                    |

1229

1230 Pellets from each centrifugation step were resuspended in 50  $\mu$ L of PBS, and proteins were  
1231 solubilized by adding 50  $\mu$ L of 2x lysis buffer (200 mM HEPES pH 8.0, 100 mM DTT, 4% (w/v)  
1232 SDS). For fraction 10 (cytosol enriched), 300 $\mu$ L was taken and supplemented with 300  $\mu$ L of  
1233 2x lysis buffer. All the samples were then sonicated using a Bioruptor Plus (Diagenode) for 5  
1234 cycles with 60 sec ON and 30 sec OFF with max intensity, boiled for 10 min at 95°C, and a  
1235 second sonication cycle was performed. The solubilized proteins were reduced with 200mM  
1236 DTT for 15 min at 45°C and alkylated using freshly made 200mM IAA for 30 min at room  
1237 temperature in the dark. Subsequently, proteins were precipitated using cold acetone,  
1238 dissolved in 1 M guanidine HCl in 100 mM HEPES pH8.0, and digested using LysC and  
1239 trypsin, as described in (Buczak et al. 2020). The digested proteins were then acidified with  
1240 10 % (v/v) trifluoroacetic acid and desalted using Oasis® HLB  $\mu$ Elution Plate 30  $\mu$ m following  
1241 manufacturer instructions. The eluates were dried down using a vacuum concentrator and  
1242 reconstituted in 5 % (v/v) acetonitrile, 0.1 % (v/v) formic acid. Samples were transferred  
1243 directly to MS vials, diluted to a concentration of  $\sim$ 1  $\mu$ g/ $\mu$ L, and spiked with iRT kit peptides  
1244 prior to analysis by LC-MS/MS.

1245

### 1246 **Differential detergent extraction**

1247 All the following steps were performed at 4°C, keeping samples on ice unless stated otherwise.  
1248 For each replicate, 2.5 mL of brain homogenate was thawed on ice. After thawing, the  
1249 homogenate was centrifuged at 500  $yg$  for 5 min at 4°C to remove debris. The supernatant  
1250 was collected, and 64  $\mu$ L of 20% (v/v) IGEPAL Nonidet P-40 (Sigma) was added to reach an  
1251 initial concentration of 0.5% (v/v). The homogenate was then divided into 4x 1.5mL  
1252 ultracentrifuge tubes and sonicated in a Bioruptor Plus for 10 cycles with 30 min ON and 30 s  
1253 OFF with max intensity at 24 °C. The homogenates were then loaded into a TLA55 rotor and  
1254 ultracentrifuged with an Optima TLX-BenchTop Ultracentrifuge at 100,0000  $yg$  for 5 min at  
1255 24°C. After ultracentrifugation, the supernatants were collected and stored as “soluble” (S)  
1256 fraction. The remaining pellets were resuspended in 1mL of buffer A (10 mM HEPES pH 8.0,  
1257 2 mM MgAc, 2 mM EDTA, 0.5% NP-40), samples were mixed by vortexing, and sonicated in  
1258 a Bioruptor Plus for 10 cycles with 30 s ON and 30 s OFF with max intensity at 24 °C. Samples



1259 were then ultracentrifuged again at 100,000  $xg$  for 5 min at 24°C. The supernatants (“F1”)  
1260 were collected and the remaining pellets were resuspended in 1mL of buffer B (10 mM HEPES  
1261 pH 8.0, 2 mM MgAc, 2 mM EDTA, 0.5% NP-40, 0.25% SDS, 0.5% deoxycholic acid), mixed,  
1262 sonicated, and centrifuged as above. The supernatants (“F2”) were collected and the  
1263 remaining pellets were resuspended in 1mL of buffer C (10 mM HEPES pH 8.0, 2 mM MgAc,  
1264 2 mM EDTA, 0.5% NP-40, 2% SDS, 0.5% deoxycholic acid), mixed, sonicated, and  
1265 centrifuged as above. The supernatants (“F3”) and the remaining pellets were collected. All  
1266 the collected samples were stored at -80°C until further analysis.

1267  
1268

### 1269 **Data independent acquisition for proteome quantification**

1270 Peptides were separated in trap/elute mode using the nanoAcquity MClass Ultra-High  
1271 Performance Liquid Chromatography system (Waters, Waters Corporation, Milford, MA, USA)  
1272 equipped with trapping (nanoAcquity Symmetry C18, 5  $\mu\text{m}$ , 180  $\mu\text{m}$   $\times$  20 mm) and an  
1273 analytical column (nanoAcquity BEH C18, 1.7  $\mu\text{m}$ , 75  $\mu\text{m}$   $\times$  250 mm). Solvent A was water  
1274 and 0.1% formic acid, and solvent B was acetonitrile and 0.1% formic acid. 1  $\mu\text{l}$  of the samples  
1275 (~1  $\mu\text{g}$  on column) were loaded with a constant flow of solvent A at 5  $\mu\text{l}/\text{min}$  onto the trapping  
1276 column. Trapping time was 6 min. Peptides were eluted via the analytical column with a  
1277 constant flow of 0.3  $\mu\text{l}/\text{min}$ . During the elution, the percentage of solvent B increased  
1278 nonlinearly from 0–40% in 120 min. The total run time was 145 min, including equilibration  
1279 and conditioning. The LC was coupled to an Orbitrap Exploris 480 (Thermo Fisher Scientific,  
1280 Bremen, Germany) using the Proxeon nanospray source. The peptides were introduced into  
1281 the mass spectrometer via a Pico-Tip Emitter 360- $\mu\text{m}$  outer diameter  $\times$  20- $\mu\text{m}$  inner diameter,  
1282 10- $\mu\text{m}$  tip (New Objective) heated at 300 °C, and a spray voltage of 2.2 kV was applied. The  
1283 capillary temperature was set at 300°C. The radio frequency ion funnel was set to 30%. For  
1284 DIA data acquisition, full scan mass spectrometry (MS) spectra with a mass range 350–1650  
1285  $m/z$  were acquired in profile mode in the Orbitrap with the resolution of 120,000 FWHM. The  
1286 default charge state was set to 3+. The filling time was set at a maximum of 60 ms with a  
1287 limitation of  $3 \times 10^6$  ions. DIA scans were acquired with 40 mass window segments of differing  
1288 widths across the MS1 mass range. Higher collisional dissociation fragmentation (stepped  
1289 normalized collision energy; 25, 27.5, and 30%) was applied, and MS/MS spectra were  
1290 acquired with a resolution of 30,000 FWHM with a fixed first mass of 200  $m/z$  after  
1291 accumulation of  $3 \times 10^6$  ions or after filling time of 35 ms (whichever occurred first). Data were  
1292 acquired in profile mode. For data acquisition and processing of the raw data, Xcalibur 4.3  
1293 (Thermo) and Tune version 2.0 were used.

1294

### 1295 **Data processing for MS-DIA samples**

1296 Spectral libraries were created by searching the DIA or/and DDA runs using Spectronaut  
1297 Pulsar (14.9.2 and 15.3.2, Biognosys, Zurich, Switzerland). The data were searched against  
1298 species-specific protein databases (Nfu\_20150522, annotation  
1299 nfurzeri\_genebuild\_v1.150922) with a list of common contaminants appended. The data were  
1300 searched with the following modifications: carbamidomethyl (C) as fixed modification, and  
1301 oxidation (M), acetyl (protein N-term), lysine di-glycine (K- $\epsilon$ -GG), phosphorylated tyrosine (T)  
1302 and serine (S) and acetyl-lysine (K-Ac) as variable modifications for the respective PTMs  
1303 enrichments. A maximum of 3 missed cleavages were allowed for K-Ac and K- $\epsilon$ -GG  
1304 modifications, 2 missed cleavages were allowed for phospho enrichment. The library search  
1305 was set to 1 % false discovery rate (FDR) at both protein and peptide levels. DIA data were

1306 then uploaded and searched against this spectral library using Spectronaut Professional  
 1307 (v14.9.2 and 15.3.2) and default settings. Relative quantification was performed in  
 1308 Spectronaut for each pairwise comparison using the replicate samples from each condition  
 1309 using default settings, except:  
 1310  
 1311

| <b>Dataset</b>         | <b>Software version</b> | <b>Test</b>     | <b>Data Filtering</b>  | <b>Imputation</b> | <b>Normalization</b> |
|------------------------|-------------------------|-----------------|------------------------|-------------------|----------------------|
| Aging proteome         | 15.3.2                  | Unpaired t-test | Q-value                | Global Imputing   | True, Automatic      |
| LOPIT-DC               | 14.9.2                  | NA              | Q-value percentile 0.2 | Run Wise Imputing | True, Global         |
| Detergent insolubility | 15.4.2                  | NA              | Q-value percentile 0.2 | Run Wise Imputing | False                |
| Proteasome Inhibition  | 14.9.2                  | Unpaired t-test | Q-value                | Global Imputing   | True, Automatic      |
| PTMs - Ubiquitin       | 15.4.2                  | –               | Q-value percentile 0.2 | Global Imputing   | True, Automatic      |
| PTMs - Phosphorylation | 15.4.2                  | –               | Q-value percentile 0.2 | Global Imputing   | True, Automatic      |
| PTMs - Acetylation     | 15.4.2                  | –               | Q-value percentile 0.2 | Global Imputation | True, Automatic      |

1312  
 1313 Candidates and report tables were exported from Spectronaut and used for downstream  
 1314 analysis.

1315  
 1316 **Immunoblot**

1317 Killifish brains and cells treated for 24 hours with anisomycin (Cell Signaling Technology,  
 1318 2222) were lysed following as described in “Sample preparation for total proteome and  
 1319 analysis of PTMs”. Protein concentration was estimated by Qubit assay (Invitrogen, Q33211),  
 1320 and 30 µg of proteins were used. 4× loading buffer (1.5 M Tris pH 6.8, 20% (w/v) SDS, 85%  
 1321 (v/v) glycerin, 5% (v/v) β-mercaptoethanol) was added to each sample and then incubated at  
 1322 95 °C for 5 minutes. Proteins were separated on 4–20% Mini-Protean® TGX™ Gels (BioRad,  
 1323 4561096) by sodium dodecyl sulfate-polyacrylamide gel electrophoresis (SDS-PAGE) using a  
 1324 Mini-Protean® Tetra Cell system (BioRad, Neuberg, Germany, 1658005EDU). Proteins were  
 1325 transferred to a nitrocellulose membrane (Carl Roth, 200H.1) using a Trans-Blot® Turbo™  
 1326 Transfer Starter System (BioRad, 1704150). Membranes were stained with Ponceau S  
 1327 (Sigma, P7170-1L) for 5 min on a shaker (Heidolph Duomax 1030), washed with Milli-Q water,  
 1328 imaged on a Molecular Imager ChemiDoc™ XRS + Imaging system (BioRad) and destained  
 1329 by 2 washes with PBS and 2 washes in TBST (Tris-buffered saline (TBS, 25 mM Tris, 75 mM

1330 NaCl), with 0.5% (v/v) Tween-20) for 5 min. After incubation for 5 min in EveryBlot blocking  
1331 buffer (Biorad, 12010020), membranes were incubated overnight with primary antibodies  
1332 against RPS3 (Bethyl Laboratories, A303-840A-T) or  $\alpha$ -tubulin (Sigma, T9026) diluted  
1333 (1:1000) in enzyme dilution buffer (0.2% (w/v) BSA, 0.1% (v/v) Tween20 in PBS) at 4 °C on  
1334 a tube roller (BioCote® Stuart® SRT6). Membranes were washed 3 times with TBST for  
1335 10 min at room temperature and incubated with horseradish peroxidase coupled secondary  
1336 antibodies (Dako, P0448/P0447) at room temperature for 1 h (1:2000 in 0.3% (w/v) BSA in  
1337 TBST). After 3 more washes for 10 min in TBST, chemiluminescent signals were detected  
1338 using ECL (enhanced chemiluminescence) Pierce detection kit (Thermo Fisher Scientific,  
1339 Waltham, MA, USA, #32109). Signals were acquired on the Molecular Imager ChemiDoc™  
1340 XRS + Imaging system and analyzed using the Image Lab 6.1 software (Biorad). Membranes  
1341 were stripped using stripping buffer (1% (w/v) SDS, 0.2 M glycine, pH 2.5), washed 3 times  
1342 with TBST, blocked, and incubated with the second primary antibody, if necessary.

1343

1344

### 1345 **RNA isolation for RNA-Seq analysis**

1346 Individual brains from the fish were collected and snap-frozen in liquid nitrogen. The protein  
1347 amount was estimated based on fresh tissue weight (assuming 5% of protein w/w), and ice-  
1348 cold 1x PBS with protease/ phosphatase inhibitors (Roche, 11836170001, 4906837001) was  
1349 added accordingly to a final concentration of 2  $\mu$ g/ $\mu$ L. Samples were then vortexed (5 times)  
1350 before sonication (Bioruptor Plus) for 10 cycles (60 sec ON/30 sec OFF) at the high setting,  
1351 at 4 °C. The samples were then centrifuged at 3000  $xg$  for 5 min at 4 °C, and the supernatant  
1352 was transferred to 2 mL Eppendorf tubes. 1.5 mL of ice-cold Qiazol (Qiagen, 79306) reagent  
1353 was added to 150  $\mu$ L of homogenate, vortexed five times, and snap-frozen in liquid nitrogen.  
1354 On the day of the experiment, samples were thawed on ice, vortexed five times, and incubated  
1355 at room temperature for 5 min before adding 300  $\mu$ L of chloroform. Samples were mixed  
1356 vigorously, incubated for 3 min at room temperature, and centrifuged at 12000  $xg$  for 20 min  
1357 at 4 °C. The upper aqueous phase (600  $\mu$ L) was carefully transferred into a fresh tube, and  
1358 the remaining volume (phenol/chloroform phase) was kept on ice for DNA isolation. The  
1359 aqueous phase was mixed with 1.1 volume of isopropyl alcohol, 0.16 volumes of sodium  
1360 acetate (2 M; pH 4.0), and 1  $\mu$ L of GlycoBlue (Invitrogen, AM9515) to precipitate RNA. After  
1361 10 min incubation at room temperature, samples were centrifuged at 12000  $xg$  for 30 min at 4  
1362 °C. The supernatant was completely removed, and RNA pellets were washed by adding 80%  
1363 (v/v) ethanol and centrifuging at 7500  $xg$  for 5 min at 4 °C. The washing steps were performed  
1364 twice. The resulting pellets were air-dried for no more than 5 min and dissolved in 10  $\mu$ L  
1365 nuclease-free water. To ensure full dissolution of RNA in water, samples were then incubated  
1366 at 65 °C for 5 min, before storage at -80 °C.

1367

### 1368 **RNA-Seq library preparation**

1369 Sequencing of RNA samples was done using Illumina's next-generation sequencing  
1370 methodology (Bentley et al. 2008). In detail, quality check and quantification of total RNA was  
1371 done using the Agilent Bioanalyzer 2100 in combination with the RNA 6000 pico kit (Agilent  
1372 Technologies, 5067-1513). Total RNA library preparation was done by introducing 500 ng total  
1373 RNA into Illumina's NEBNext Ultra II directional mRNA (UMI) kit (NEB, E7760S), following the  
1374 manufacturer's instructions. The quality and quantity of all libraries were checked using  
1375 Agilent's Bioanalyzer 2100 and DNA 7500 kit (Agilent Technologies, 5067-1506).

1376

## 1377 **RNA-Seq sequencing**

1378 All libraries were sequenced on a NovaSeq6000 SP 300 cycles v1.5; paired-end 151 bp (one  
1379 pair for each of the projects). Total RNA libraries were pooled and sequenced in three lanes.  
1380 Small RNA libraries were pooled and sequenced in one lane. Sequence information was  
1381 extracted in FastQ format using Illumina's bcl2FastQ v2.20.0.422, against the *Nothobranchius*  
1382 *furzeri* reference genome (Nfu\_20150522, annotation nfuzeeri\_genebuild\_v1.150922).  
1383 Alignment to the reference genome was performed using STAR (Dobin et al. 2012) with the  
1384 following parameters: `--outSAMmultNmax 1 --outFilterMultimapNmax 1 --`  
1385 `outFilterMismatchNoverLmax 0.04 --sjdbOverhang 99 --alignIntronMax 1000000 --`  
1386 `outSJfilterReads Unique`. The deduplication step was performed using the `umi_tool v1.1.1`  
1387 (Smith, Heger, and Sudbery 2017), using the following parameters: `extract --bcpattern=`  
1388 `NNNNNNNNNNN`, `dedup --chimeric-pairs discard --unpaired-reads discard -- paired`.  
1389

## 1390 **RNA-Seq quantification and differential expression**

1391 RNA-Seq data were then processed as follows: quantification was performed using  
1392 `featurecounts v2.0.3` (Liao, Smyth, and Shi 2013) with the following parameters `-s 2 -p -B --`  
1393 `countReadPairs`. Differential expression analysis was performed using the `DESeq2` package  
1394 (v1.34.0) (Love, Huber, and Anders 2014). Raw count data were normalized using the  
1395 transcript per million strategy.  
1396

## 1397 **Ribo-Seq library preparation**

1398 Ribosome profiling libraries were prepared following previously published protocol with  
1399 modifications (Stein et al., 2022). 10~15 brain samples from fish were combined and lysed  
1400 frozen using Cryo-Mill (Retsch, MM301) in the presence of 1ml of lysis buffer (20 mM Tris-HCl  
1401 pH 7.5, 140 mM KCl, 5 mM MgCl<sub>2</sub>, 1 mM DTT, 100 µg/ml Cycloheximide, 1% Triton X-100,  
1402 and 1 X Protease Inhibitor). Lysed powder was quickly thawed in a water bath at room  
1403 temperature and spun at 21,000 g for 15 minutes at 4 °C to clear lysate. RNase I (Invitrogen,  
1404 AM2294) was added to 0.4U/µg of RNA and incubated at 25 °C for 45 minutes. Digestion was  
1405 stopped by adding 0.4U/µg of SUPERaseIn RNase Inhibitor (Invitrogen, AM2696). RNase-  
1406 treated lysate was layered on 900 µl sucrose cushion buffer (20 mM Tris-HCl pH 7.5, 140 mM  
1407 KCl, 5 mM MgCl<sub>2</sub>, 1 mM DTT, 100 µg/ml Cycloheximide, 0.02U/µl SuperaseIn, 1M Sucrose),  
1408 and spun at 100,000 rpm for 1 hour at 4 °C in TLA100.3 rotor. Resulting ribosome pellet was  
1409 resuspended in 250 µl of lysis buffer with SuperaseIn and RNA was extracted using TRIzol  
1410 reagent (Invitrogen, 15596026) following manufacturer's protocol. 27-34bp fragments were  
1411 isolated from denaturing gel, ligated to adapter (NEB, S1315S), and ribosomal RNA was  
1412 removed using RiboCop (Lexogen, 144.24) mixed with custom depletion DNA oligos (Table  
1413 2). Remaining fragments were reverse transcribed, circularized, and PCR amplified following  
1414 the steps described previously (McGlinchey and Ingolia 2017). Barcoded samples were pooled  
1415 and sequenced using Hiseq 4000 (Illumina).  
1416

## 1417 **Imaging**

1418

## 1419 **Cryo-sections preparation and free-floating immunofluorescence**

1420 To prepare brain cryo-sections for free-floating immunofluorescence from 5 wph and 39 wph  
1421 old killifish, brains were dissected and fixed ON in a solution of 4% paraformaldehyde PFA in  
1422 PBS at 4°C. The samples were then equilibrated in a 30% sucrose solution ON at 4° and  
1423 subsequently embedded in cryo-protectant (Tissue -Tek O.C.T. Compound; Sakura Finetek,

1424 USA). Tissue slices of 50mm thickness were cut at a cryostat (Leica) and stored on glass  
1425 slides (Thermo Fisher Scientific, USA).

1426 Free-floating immunofluorescence experiments were performed by adapting previous  
1427 protocols for classical on-slide immunofluorescence (Sara Bagnoli, Terzibasi Tozzini, and  
1428 Cellerino 2023). Briefly, the sections were washed in PBS to remove the cryo-embedding  
1429 medium and detached from the glass slide. The sections were then placed in 24-wells and  
1430 performed two additional washes in PBS for 5 min each. Afterward, an acid antigen retrieval  
1431 step (10 mM Tri-sodium citrate dihydrate, 0.05% tween, at pH 6) was performed by bringing  
1432 the solution to boiling point in a microwave and adding 50ml of it in each well, leaving the  
1433 solution for 5 minutes. This step was repeated two times.. 500 ml of blocking solution (5%  
1434 BSA, 0.3% Triton-X in PBS) was then applied for 2 h. Primary antibodies (Phospho-Tau  
1435 AT100, NeuN or Lamp1 Table 1) at the proper dilution were added in a solution of 1% BSA,  
1436 0.1% triton in PBS, and left overnight at 4°C in slow agitation on a rocker. Next day, the proper  
1437 secondary antibodies (Table 1) at a 1:500 dilution were used in the same solution. After 2h of  
1438 incubation, slices were washed three times with PBS, counter-stained with a solution 1:10000  
1439 of Hoechst 33342 (Invitrogen, USA) for two minutes and manually mounted under a  
1440 stereomicroscope on Superfrost Plus glass slides (Thermo Fisher Scientific, USA). Finally,  
1441 Fluoroshield mounting medium (Sigma, USA) was used and slices were covered with a  
1442 coverglass (Thermo Fisher Scientific, USA).

1443

#### 1444 **Image acquisition**

1445 Imaging of lysosomal staining was performed with a Zeiss scanning confocal microscope  
1446 (LSM900, Zeiss, Germany) equipped with an Airyscan module. Nine consecutive z planes with  
1447 a step of 300nm were acquired with a 63x oil immersion objective (Plan-Apochromat 63x/1.4  
1448 Oil DIC M27, Zeiss, Germany) at a resolution of 2186x2186 pixels with the use of Airyscan.  
1449 Images were then deconvoluted in the Zeiss Zen blue 3.7 suite using the Fast Iterative  
1450 algorithm and exported as tiff for further analysis in Imaris (Bitplane, UK).

1451 Samples processed for Tau stainings were imaged with an Axio Imager Z.2 (Zeiss, Germany)  
1452 equipped with an Apotome slide using a 63x oil immersion objective (Plan-Apochromat 63x/1.4  
1453 Oil DIC M27, Zeiss, Germany). Z-stacks were realized by acquiring five consecutive z-planes  
1454 at an interval of 1 micron. Images were then processed in imageJ (Fiji).

1455

#### 1456 **Lysosomes morphological analysis**

1457 To analyze the change in morphology of lysosomes in aging, we analyzed nine 5 wph samples  
1458 and twelve 39 wph samples. To study morphological changes in case of proteostasis  
1459 alteration, samples from six bortezomib-treated animals and six controls (DMSO treated) were  
1460 analyzed. Tiff images were loaded in Imaris (Bitplane, UK) to recreate a 3D rendering of the  
1461 samples. A version of the 'Surfaces' algorithm was created, optimizing the settings to realize  
1462 an optimal mask of single lysosomes. Statistics obtained (Area, Volume, Mean intensity, and  
1463 Sphericity) were extracted, and mean values for each animal were calculated. Data  
1464 significance was tested using a two-tails T-test.

1465

#### 1466 **Mean fluorescence intensity analysis**

1467 To analyze differences in the amount of Tau phosphorylation between young (5 wph) and old  
1468 (39 wph) *Nothobranchius furzeri* brain samples, we performed mean fluorescence intensity  
1469 (MFI) analysis in the free license software ImageJ (Fiji). Since Tau is a neuronal protein, and  
1470 the number of neurons between young and old animals varies, we normalized the MFI of Tau

1471 staining over the MFI of NeuN, a neuronal-specific marker, in order to render the Tau MFI  
 1472 proportional to the number of neurons. Images were opened in ImageJ (Fiji), and median  
 1473 filtering (1px radius) was applied. The average intensity projection was realized, and MFI for  
 1474 the green channel (Tau) and red channel (NeuN) was measured and reported in an Excel  
 1475 table. Tau MFI for each animal was divided by the corresponding NeuN MFI, and the  
 1476 significance of the results was tested by a two-tails T-test.  
 1477  
 1478

| Primary Antibody           | Producer                 | Catalog Number | Type              | Working dilution |
|----------------------------|--------------------------|----------------|-------------------|------------------|
| Lamp1                      | Abcam                    | Ab24170        | Polyclonal Rabbit | 1:500            |
| NeuN                       | Abcam                    | Ab177487       | Monoclonal Rabbit | 1:500            |
| Phospho-Tau AT100          | Thermo Fisher Scientific | MN1060         | Monoclonal Mouse  | 1:400            |
|                            |                          |                |                   |                  |
| <b>Secondary Antibody</b>  |                          |                |                   |                  |
| AlexaFluor 488 anti-Rabbit | Invitrogen               | A11001         | Goat IgG          | 1:500            |
| AlexaFluor 568 anti-Rabbit | Invitrogen               | A11011         | Goat IgG          | 1:500            |
| AlexaFluor 488 anti-Mouse  | Invitrogen               | A11004         | Goat IgG          | 1:500            |

1479  
 1480 Table 1: List of antibodies utilized in this work  
 1481

|          |                                                   |
|----------|---------------------------------------------------|
| Oligo #1 | GGCCGTTACCGGCCTCACACCGTCCATGGGATGAGC/3BioTEG/     |
| Oligo #2 | CGGGCGAGACGGGCCGGTGGTGCGCCCGGGAAC/3BioTEG/        |
| Oligo #3 | CGCCTCCCCGCCTCACCGGGTAAGTGAAAAACGATAAGAG/3BioTEG/ |
| Oligo #4 | GCACGCGCCGGGCGCTTGACACCAGAACCGAGAGC/3BioTEG/      |

1482  
 1483 Table 2: List of DNA oligonucleotides used for ribosomal RNA depletion  
 1484

## 1485 **Data analysis**

1486

### 1487 **Protein subcellular localization by LOPIT-DC**

1488 For each age group and replicate, protein distribution profiles were calculated by dividing the  
1489 scaled protein quantity in each fraction by the total sum of protein quantity across all fractions.  
1490 Protein markers for the different compartments were taken from the Bioconductor package  
1491 pRoloc (Crook et al. 2019), by mapping *Nothobranchius furzeri* entries onto *Homo sapiens*  
1492 entries via orthologues mapping. To classify each of the proteins into a stable compartment,  
1493 a support-vector-machine classifier with a radial kernel (Breckels et al. 2016) was used. Hyper-  
1494 parameters  $C$  and  $\gamma$  were selected via a grid-search approach using a 5-fold cross-  
1495 validation iterated 100 times. The best  $C$  and  $\gamma$  parameters were selected to classify the  
1496 “unknown” proteome. Only classified proteins with an SVM-score  $> 0.7$  were considered stable  
1497 classification. To detect age-related changes in subcellular fractionation, a two-step approach  
1498 was implemented. For each normalized protein profile, a principal component analysis was  
1499 used to summarize the variance from the 10 fractions in each replicate and age group. After  
1500 summarization, the first two principal component scores were used to perform a Hotelling  $T^2$   
1501 test to detect changes in the multivariate protein profile mean. To estimate effect sizes, the  
1502 median Euclidean distance between age groups was calculated for each protein profile (see  
1503 Figure S1F).

1504

### 1505 **Differential detergent extraction**

1506 A batch correction was applied to remove the effects of different batches of LC-MS/MS  
1507 analysis using the `limma::removeBatchEffect` function from the `limma` package (Ritchie et al.  
1508 2015). Then, for each protein group, a detergent insolubility profile was generated by dividing  
1509 the protein quantities from fractions F1:F3 by the quantity in the soluble (S) fraction, and log2  
1510 transformed. To detect significant changes in detergent insolubility profiles between age  
1511 groups, a MANOVA test was applied to the detergent insolubility profiles using the standard  
1512 function in the R programming language, and P-values were corrected for multiple testing  
1513 using the FDR strategy. To estimate effect sizes, a detergent-insolubility-score (DIS) was  
1514 calculated by summing the log2 transformed protein quantities in fractions F1:F3 relative to  
1515 the S “soluble” fraction. For each age group and protein group, the median DIS between  
1516 replicates was used to estimate the magnitude of changes in detergent insolubility:  $\Delta\text{DIS} =$   
1517  $\text{DIS}_{39\text{wph}} - \text{DIS}_{12\text{wph}}$ . High values of  $\Delta\text{DIS}$  indicate proteins that become more detergent resistant  
1518 in the old (39 wph) samples (see Figure S2E).

1519

### 1520 **Modified peptide abundance correction**

1521 For each enrichment, PTMs report tables were exported from Spectronaut. To correct the  
1522 quantities of modified peptides for underlying changes in protein abundance across the age  
1523 groups compared, correction factors were calculated using the aging proteome data. For each  
1524 condition and protein group, the median protein quantity was calculated and then divided by  
1525 the median protein quantity in the young (5 wph) age group. Each modified peptide was  
1526 matched by protein identifier to the correction factor table. If a modified peptide was mapped  
1527 to 2 or more proteins, the correction factor was calculated using the sum of the quantity of  
1528 these proteins. Further, the correction was carried out by dividing peptide quantities by the  
1529 mapped correction factors, and log2 transformed (see Figure S3). Differences in peptide  
1530 quantities were statistically determined using the t-test moderated by the empirical Bayes  
1531 method as implemented in the R package `limma` (Ritchie et al. 2015).

1532

### 1533 **Kinase activity prediction from phosphoproteome data**

1534 Kinase activity prediction was calculated using the Kinase library ([https://kinase-](https://kinase-library.phosphosite.org/ea?a=de)  
1535 [library.phosphosite.org/ea?a=de](https://kinase-library.phosphosite.org/ea?a=de), (Johnson et al. 2023) using the differential expression-  
1536 based analysis and default parameter.

1537

### 1538 **GO enrichment analysis**

1539 Gene Set Enrichment Analysis (GSEA) was performed using the R package clusterProfiler (T.  
1540 Wu et al. 2021), using the function gseGO. Briefly, *Nothobranchius furzeri* protein entries were  
1541 mapped to the human gene name orthologues and given in input to the function to perform  
1542 the enrichment. For GO term overrepresentation analysis (ORA), the topGO R package was  
1543 used.

1544

### 1545 **Identification of conserved PTMs sites**

1546 For the *Nothobranchius furzeri* proteins involved in neurodegenerative diseases (Figure 1J),  
1547 a local alignment was performed with protein BLAST(v2.12.0+) (Altschul et al. 1990) with  
1548 default parameters against the RefSeq human proteome (Taxon ID:9606). The top 10 hits  
1549 from the BLAST search were retrieved, and each modified residue was mapped into the local  
1550 alignment to identify the corresponding position in the human proteins. Each modified peptide  
1551 was then considered conserved if at least one of the top 10 hits from the BLAST alignment  
1552 had a corresponding residue in the modified amino acid position.

1553

### 1554 **Calculation of protein-transcript decoupling and multiple linear regression**

1555 For aging brain proteome data and proteasome impairment samples, protein-transcript  
1556 decoupling values were calculated as the difference in log<sub>2</sub> fold changes between proteome  
1557 and transcriptome. A null distribution was fitted on the decoupling values using the R package  
1558 fdrtool (Strimmer 2008). Q-value < 0.1 was used as a threshold to reject the null hypothesis.  
1559 The decoupling values from each protein-transcript pair were used as response variables in a  
1560 multiple linear regression model. Predictors for the model were retrieved as follows: protein  
1561 quantities were calculated as the median log<sub>2</sub> protein quantity across all replicates from the  
1562 proteomics DIA data. Protein quantities are estimated using the median peptide abundance  
1563 as calculated by the Spectronaut software. mRNA abundance values were defined as the  
1564 median log<sub>2</sub>(TPM) across all samples from the RNA-Seq aging dataset. Biophysical  
1565 parameters were calculated for each protein with the R package Peptides. Protein half-life  
1566 values were taken from mouse cortex data from (Fornasiero et al. 2018). The percentage of  
1567 gene GC content was obtained from ENSEMBL Biomart (v108) (Cunningham et al. 2022),  
1568 mapping ENSEMBL annotation against the *Nothobranchius furzeri* reference genome  
1569 (Nfu\_20150522, annotation nfuzei\_genebuild\_v1.150922) using bedtools (Quinlan and Hall  
1570 2010). Multiple linear regression models were then performed using the `lm` base R function  
1571 by keeping only complete and unique observations from the matrix generated. Features were  
1572 scaled for each dataset, and a multiple linear regression model without intercept was fitted to  
1573 the data.

1574

### 1575 **Data integration**

1576 Log<sub>2</sub> fold changes (for PTMs), ΔDIS (for detergent insolubility), or protein-transcript  
1577 decoupling values were used as input for a GSEA analysis based on GO cellular component  
1578 terms using the gseGO function from the clusterProfile (T. Wu et al. 2021) R package with the



1579 following parameters minSize = 5 and maxSize = 400. For each GSEA, the normalized  
1580 enrichment scores (NES) were taken and arranged in a matrix with different GO terms as rows  
1581 and different datasets as columns. To visualize the relationship between the dataset, a  
1582 principal component analysis was performed on the matrix. Missing GO terms in a given  
1583 dataset were imputed as 0 values. The sum of the scores on the first two principal components  
1584 was used to extract the most strongly affected GO terms from the combined integration of all  
1585 the datasets.

1586

### 1587 **Mitochondrial proteome composition**

1588 To calculate age-related changes in mitochondrial proteome composition (Figure 3H), raw DIA  
1589 files coming from fraction 02 of the LOPIT-DC experiment were re-analyzed in Spectronaut  
1590 (v16.2), using the same parameters as the other LOPIT-DC experiment. Fraction 02  
1591 represents the fraction where mitochondrial proteins are sedimenting in the LOPIT-DC  
1592 experiment and, therefore, strongly enriched for mitochondrial proteins (Figure S1C-D). From  
1593 the protein quantity matrix, mitochondrial proteins (according to Mitocarta3.0 annotation  
1594 (Pagliarini et al. 2008)) were extracted, and their quantities log2 transformed and normalized  
1595 by median centering. To detect changes in composition, a linear model on the log2  
1596 mitochondrial-centered values was implemented between the two age groups with the R  
1597 package limma (Ritchie et al. 2015).

1598

### 1599 **Ribo-seq data processing and analysis**

1600 Data processing and analysis was based on previously published protocol (Stein et al. 2022).  
1601 Adapter sequences were removed from demultiplexed sequencing reads using Cutadapt  
1602 v.1.4.2 (Martin 2011), followed by removal of the 5' nucleotide using FASTX-Trimmer. Reads  
1603 mapping to ribosomal RNAs were removed using Bowtie v.1.3.1 (Langmead et al. 2009).  
1604 Remaining reads were aligned to reference libraries that consisted of coding sequences  
1605 containing 21 nucleotides flanking upstream of the start codon and downstream of the stop  
1606 codon. To maximize unique mapping, a reference library was constructed using the longest  
1607 transcripts for every 22757 genes. Bowtie alignment was performed using the following  
1608 parameters: -y -a -m 1 -v 2 -norc -best -strata. A-site offset was estimated using riboWaltz  
1609 (Lauria et al. 2018), and fragment lengths that do not exhibit 3-nucleotide periodicity were  
1610 removed. Pause scores at each position were calculated by dividing the number of reads at  
1611 each position by the average number of reads within the internal part of the transcript,  
1612 excluding the first and last 20 codons. Positions with increased pausing during aging were  
1613 identified following the previously published method (Stein et al. 2022). Briefly, for 6749  
1614 transcripts with sufficient coverage (>0.5 reads/codon and >64 reads/transcript) in all age  
1615 groups, we used a two-tailed Fisher's exact test to compare each position (codon) between  
1616 age groups to identify positions with statistically significant changes (Benjamini-Hochberg  
1617 adjusted P-value < 0.05). These positions were further filtered to include positions with odds  
1618 ratio greater than 1, pause score of the older sample greater than the pause score of younger  
1619 sample, reads in the oldest sample greater than the average number of reads across the  
1620 transcript, and a position in the internal part of the transcript to only select sites with high-  
1621 confidence age-dependent changes in pausing. To visualize amino acids enriched in age-  
1622 dependent pausing sites, we used the weighted Kullback Leibler method (Thomsen and  
1623 Nielsen 2012) using the frequency of each amino acid in coding sequences as background.  
1624 For metagene analysis around age-dependent pausing sites, reads were first aligned to these  
1625 sites and normalized by dividing reads at each codon by the average reads per codon within

1626 the analysis window to control for differences in expression and coverage. Mean and  
1627 bootstrapped 95% confidence intervals of these normalized values were plotted. Only  
1628 positions with sufficient coverage (reads/codon>0.5) in the analysis window were included. To  
1629 identify sites with disome formation, we first identified sites with strong pausing in the old  
1630 sample (pause score >6). Then, we calculated the average ribosome density of two regions  
1631 for young and old samples; 1) analysis window (40 codons up/downstream from strong pause  
1632 site) and 2) between 8 and 12 codons upstream from strong pause site (approximate position  
1633 of trailing ribosome). Sites with higher ribosome density in 2) were identified as disome sites,  
1634 and disomes sites unique to old samples were plotted. For comparisons to proteomics data  
1635 sets, we included all sites with statistically significant changes (Benjamini-Hochberg adjusted  
1636 P-value < 0.05) and used log<sub>2</sub> of pause score ratio (Old/Young).  
1637 For translation efficiency analysis, RNA-seq data was re-aligned to the same reference library  
1638 used for Ribo-seq to compare transcript abundance. Changes in translation efficiency were  
1639 calculated using DESeq2 (Love, Huber, and Anders 2014), using the following design ~assay  
1640 + condition + assay:condition, where assay indicates the different counts from RNA-Seq and  
1641 Ribo-Seq respectively, and condition indicated the different age groups.

1642

### 1643 **Estimates of mRNA half-life variations**

1644 Exonic coordinates of protein-coding genes were extracted from the annotation  
1645 *nfurzeri\_genebuild\_v1.150922*. Exonic and intronic read counts were obtained following the  
1646 procedure suggested by (Gaidatzis et al. 2016). To this end, exonic coordinates were flanked  
1647 on both sides by 10 nt and were grouped by gene. Intronic coordinates were obtained by  
1648 subtracting the exonic coordinates from the gene-wise coordinates. For each gene, exonic  
1649 and intronic read counts were obtained using the *htseq-count* function from HTSeq v2.0.2  
1650 (Putri et al. 2022) with the parameter *-m* set to *intersection-strict* to consider only reads that  
1651 strictly fall within an exon or an intron. Additionally, in each sample, genes with less than 10  
1652 reads on both exons and introns were ignored (read counts set as missing values) in order to  
1653 be robust against noisy estimates based on low read counts. Lastly, the log-transformed  
1654 exonic-to-intronic read count ratio *r* was computed for each gene and sample as:

1655

$$1656 \quad r = \text{Log}_2(\text{exonic counts} + 1) - \text{Log}_2(\text{intronic counts} + 1)$$

1657

1658 Gene-specific biases such as exonic and intronic lengths and GC content can affect exonic  
1659 and intronic read counts. These biases cancel out when ratios between samples are  
1660 considered, as they are typically multiplicative (Gaidatzis et al. 2016). The ratio between  
1661 mRNA half-life in sample *s\_1* and sample *s\_2* is then estimated as:

1662

$$1663 \quad \text{Log}_2\left(\frac{\text{mRNA half-life } s_1}{\text{mRNA half-life } s_2}\right) = \frac{r_1}{r_2}$$

1664

### 1665 **Estimates of protein synthesis rate**

1666 To estimate  $k_i$ , 5'-UTRs sequences were retrieved from the *Nothobranchius furzeri* reference  
1667 genome (Nfu\_20150522, annotation *nfurzeri\_genebuild\_v1.150922*). The masked FASTA  
1668 genome sequences were parsed using *bedtools* (Quinlan and Hall 2010). The translation  
1669 starting codon "ATG" was identified from the `CDS` features from the GFF file. The region  
1670 around the starting codon was extracted with +6 nucleotide upstream and +4 nucleotide  
1671 downstream to match the pattern "NNNNNNATGNN". Only valid sequences (without

1672 ambiguous nucleotides) with an ATG starting codon in the correct position were retained. 91%  
1673 of the transcript annotated in the GFF file had a valid translation initiation region as described  
1674 above. The  $k_i$  was then estimated using the dinucleotide position weight matrix from (Noderer  
1675 et al. 2014). In case a single transcript had multiple starting sites, the  $k_i$  values were  
1676 summarized by taking the median value. This led to the estimate of  $k_i$  for 59129 transcripts.  
1677 Estimated protein synthesis rates were calculated as in (Mills and Green 2017; Khajuria et al.  
1678 2018). More in detail, the authors described the estimated synthesis rate as:

1679

1680

$$Q = mRk_i [1 - (L / ((k_e / (k_i R)) + (L - 1)))]$$

1681

1682 where  $Q$  refers to the estimated synthesis rate,  $m$  refers to individual mRNA expression level  
1683 obtained from the median across sample  $\log_2(\text{TPM})$  from RNA-Seq data and normalized  
1684 between 0 and 1,  $R$  represents the total amount of available ribosomes,  $k_i$  indicates an mRNA-  
1685 specific translation initiation rate as computed above and normalized between 0 and 1,  $L$  is  
1686 the number of codons occupied by one ribosome, set to 10 (based on the average length of a  
1687 ribosome footprint), and  $k_e$  is the termination rates arbitrarily set to 1. Estimated synthesis  
1688 rates were then computed for different values of  $R$  ranging from 1.3 to 0.

1689

1690

1691

1692 **Declaration of generative AI and AI-assisted technologies in the writing process:**

1693 During the preparation of this work the author(s) used Chat GPT (v3.5) in order to  
1694 improve readability of the manuscript. After using this tool/service, the author(s)  
1695 reviewed and edited the content as needed and take(s) full responsibility for the  
1696 content of the publication.

1697

1698

1699

1700

1701

1702

1703

1704

1705

1706

1707

1708

1709

1710

1711

1712

1713

## 1714 References

- 1715 Alfonso, S. I., J. A. Callender, B. Hooli, C. E. Antal, K. Mullin, M. A. Sherman, S. E. Lesné, et  
1716 al. 2016. "Gain-of-Function Mutations in Protein Kinase C $\alpha$  (PKC $\alpha$ ) May Promote  
1717 Synaptic Defects in Alzheimer's Disease." *Science Signaling* 9 (427).  
1718 <https://doi.org/10.1126/scisignal.aaf6209>.
- 1719 Altschul, S. F., W. Gish, W. Miller, E. W. Myers, and D. J. Lipman. 1990. "Basic Local  
1720 Alignment Search Tool." *Journal of Molecular Biology* 215 (3): 403–10.
- 1721 Aman, Yahyah, Tomas Schmauck-Medina, Malene Hansen, Richard I. Morimoto, Anna  
1722 Katharina Simon, Ivana Bjedov, Konstantinos Palikaras, et al. 2021. "Autophagy in  
1723 Healthy Aging and Disease." *Nature Aging* 1 (8): 634–50.
- 1724 Anisimova, A. S., M. B. Meerson, M. V. Gerashchenko, I. V. Kulakovskiy, S. E. Dmitriev, and  
1725 V. N. Gladyshev. 2020. "Multifaceted Dereglulation of Gene Expression and Protein  
1726 Synthesis with Age." *Proceedings of the National Academy of Sciences of the United  
1727 States of America* 117 (27). <https://doi.org/10.1073/pnas.2001788117>.
- 1728 Araujo, Mariana E. G. de, Gudrun Liebscher, Michael W. Hess, and Lukas A. Huber. 2020.  
1729 "Lysosomal Size Matters." *Traffic* 21 (1): 60–75.
- 1730 Arthur, Laura, Slavica Pavlovic-Djuranovic, Kristin Smith-Koutmou, Rachel Green, Pawel  
1731 Szczesny, and Sergej Djuranovic. 2015. "Translational Control by Lysine-Encoding A-  
1732 Rich Sequences." *Science Advances* 1 (6). <https://doi.org/10.1126/sciadv.1500154>.
- 1733 Aviner, Ranen, Ting-Ting Lee, Vincent B. Masto, Dan Gestaut, Kathy H. Li, Raul Andino, and  
1734 Judith Frydman. 2022. "Ribotoxic Collisions on CAG Expansions Disrupt Proteostasis  
1735 and Stress Responses in Huntington's Disease." *bioRxiv*.  
1736 <https://doi.org/10.1101/2022.05.04.490528>.
- 1737 Bagnoli, Sara, Eva Terzibasi Tozzini, and Alessandro Cellerino. 2023. "Immunofluorescence  
1738 and Aggresome Staining of Nothobranchius Furzeri Cryosections." *Cold Spring Harbor  
1739 Protocols*, March. <https://doi.org/10.1101/pdb.prot107791>.
- 1740 Bagnoli, S., B. Fronte, C. Bibbiani, Tozzini E. Terzibasi, and A. Cellerino. 2022.  
1741 "Quantification of Noradrenergic-, Dopaminergic-, and Tectal-Neurons during Aging in  
1742 the Short-Lived Killifish Nothobranchius Furzeri." *Aging Cell* 21 (9).  
1743 <https://doi.org/10.1111/accel.13689>.
- 1744 Bai, Bing, Xusheng Wang, Yuxin Li, Ping-Chung Chen, Kaiwen Yu, Kaushik Kumar Dey, Jay  
1745 M. Yarbro, et al. 2020. "Deep Multilayer Brain Proteomics Identifies Molecular Networks  
1746 in Alzheimer's Disease Progression." *Neuron* 106 (4): 700.
- 1747 Baumgart, Mario, Steffen Priebe, Marco Groth, Nils Hartmann, Uwe Menzel, Luca Pandolfini,  
1748 Philipp Koch, et al. 2016. "Longitudinal RNA-Seq Analysis of Vertebrate Aging Identifies  
1749 Mitochondrial Complex I as a Small-Molecule-Sensitive Modifier of Lifespan." *Cell  
1750 Systems* 2 (2): 122–32.
- 1751 Bazzini, Ariel A., Florencia Del Viso, Miguel A. Moreno-Mateos, Timothy G. Johnstone,  
1752 Charles E. Vejnar, Yidan Qin, Jun Yao, Mustafa K. Khokha, and Antonio J. Giraldez.  
1753 2016. "Codon Identity Regulates mRNA Stability and Translation Efficiency during the  
1754 Maternal-to-Zygotic Transition." *The EMBO Journal* 35 (19): 2087–2103.
- 1755 Bentley, David R., Shankar Balasubramanian, Harold P. Swerdlow, Geoffrey P. Smith, John  
1756 Milton, Clive G. Brown, Kevin P. Hall, et al. 2008. "Accurate Whole Human Genome  
1757 Sequencing Using Reversible Terminator Chemistry." *Nature* 456 (7218): 53–59.
- 1758 Bhadra, Malini, Porsha Howell, Sneha Dutta, Caroline Heintz, and William B. Mair. 2020.  
1759 "Alternative Splicing in Aging and Longevity." *Human Genetics* 139 (3): 357–69.
- 1760 Bozukova, Mihaela, Chrysa Nikopoulou, Niklas Kleinenkuhnen, Dora Grbavac, Katrin  
1761 Goetsch, and Peter Tessarz. 2022. "Aging Is Associated with Increased Chromatin  
1762 Accessibility and Reduced Polymerase Pausing in Liver." *Molecular Systems Biology* 18  
1763 (9): e11002.
- 1764 Braeckman, Bart P., Koen Houthoofd, and Jacques R. Vanfleteren. 2002. "Assessing  
1765 Metabolic Activity in Aging Caenorhabditis Elegans: Concepts and Controversies."  
1766 *Aging Cell* 1 (2): 82–88; discussion 102–3.

- 1767 Breckels, Lisa M., Claire M. Mulvey, Kathryn S. Lilley, and Laurent Gatto. 2016. "A  
1768 Bioconductor Workflow for Processing and Analysing Spatial Proteomics Data."  
1769 *F1000Research* 5 (December): 2926.
- 1770 Buczak, Katarzyna, Joanna M. Kirkpatrick, Felicia Truckenmueller, Deolinda Santinha, Lino  
1771 Ferreira, Stephanie Roessler, Stephan Singer, Martin Beck, and Alessandro Ori. 2020.  
1772 "Spatially Resolved Analysis of FFPE Tissue Proteomes by Quantitative Mass  
1773 Spectrometry." *Nature Protocols* 15 (9): 2956–79.
- 1774 Caudron-Herger, Maiwen, Ralf E. Jansen, Elsa Wassmer, and Sven Diederichs. 2021.  
1775 "RBP2GO: A Comprehensive Pan-Species Database on RNA-Binding Proteins, Their  
1776 Interactions and Functions." *Nucleic Acids Research* 49 (D1): D425–36.
- 1777 Chan, Leon Y., Christopher F. Mugler, Stephanie Heinrich, Pascal Vallotton, and Karsten  
1778 Weis. 2018. "Non-Invasive Measurement of mRNA Decay Reveals Translation Initiation  
1779 as the Major Determinant of mRNA Stability." *eLife* 7 (September).  
1780 <https://doi.org/10.7554/eLife.32536>.
- 1781 Chatterjee, Shreyasi, Megan Sealey, Eva Ruiz, Chrysia M. Pegasiou, Keeley Brookes, Sam  
1782 Green, Anna Crisford, et al. 2023. "Age-Related Changes in Tau and Autophagy in  
1783 Human Brain in the Absence of Neurodegeneration." *PloS One* 18 (1): e0262792.
- 1784 Crook, Oliver M., Lisa M. Breckels, Kathryn S. Lilley, Paul D. W. Kirk, and Laurent Gatto.  
1785 2019. "A Bioconductor Workflow for the Bayesian Analysis of Spatial Proteomics."  
1786 *F1000Research* 8 (April): 446.
- 1787 Cunningham, Fiona, James E. Allen, Jamie Allen, Jorge Alvarez-Jarreta, M. Ridwan Amode,  
1788 Irina M. Armean, Olanrewaju Austine-Orimoloye, et al. 2022. "Ensembl 2022." *Nucleic  
1789 Acids Research* 50 (D1): D988–95.
- 1790 Datta, Dibyadeep, Shannon N. Leslie, Min Wang, Yury M. Morozov, Shengtao Yang,  
1791 Sueann Mentone, Caroline Zeiss, et al. 2021. "Age-Related Calcium Dysregulation  
1792 Linked with Tau Pathology and Impaired Cognition in Non-Human Primates."  
1793 *Alzheimer's & Dementia: The Journal of the Alzheimer's Association* 17 (6): 920–32.
- 1794 David, Della C., Noah Ollikainen, Jonathan C. Trinidad, Michael P. Cary, Alma L.  
1795 Burlingame, and Cynthia Kenyon. 2010. "Widespread Protein Aggregation as an  
1796 Inherent Part of Aging in *C. Elegans*." *PLoS Biology* 8 (8): e1000450.
- 1797 Debès, Cédric, Antonios Papadakis, Sebastian Grönke, Özlem Karalay, Luke S. Tain,  
1798 Athanasia Mizi, Shuhei Nakamura, et al. 2023. "Ageing-Associated Changes in  
1799 Transcriptional Elongation Influence Longevity." *Nature* 616 (7958): 814–21.
- 1800 Dick, F., O. B. Tysnes, G. W. Alves, G. S. Nido, and C. Tzoulis. 2023. "Altered  
1801 Transcriptome-Proteome Coupling Indicates Aberrant Proteostasis in Parkinson's  
1802 Disease." *iScience* 26 (2). <https://doi.org/10.1016/j.isci.2023.105925>.
- 1803 Dobin, Alexander, Carrie A. Davis, Felix Schlesinger, Jorg Drenkow, Chris Zaleski, Sonali  
1804 Jha, Philippe Batut, Mark Chaisson, and Thomas R. Gingeras. 2012. "STAR: Ultrafast  
1805 Universal RNA-Seq Aligner." *Bioinformatics* 29 (1): 15–21.
- 1806 Espada, Lilia, Alexander Dakhovnik, Prerana Chaudhari, Asya Martirosyan, Laura Miek,  
1807 Tetiana Poliezhaieva, Yvonne Schaub, et al. 2020. "Loss of Metabolic Plasticity  
1808 Underlies Metformin Toxicity in Aged *Caenorhabditis Elegans*." *Nature Metabolism* 2  
1809 (11): 1316–31.
- 1810 Fornasiero, Eugenio F., Sunit Mandad, Hanna Wildhagen, Mihai Alevra, Burkhard Rammner,  
1811 Sarva Keihani, Felipe Opazo, et al. 2018. "Precisely Measured Protein Lifetimes in the  
1812 Mouse Brain Reveal Differences across Tissues and Subcellular Fractions." *Nature  
1813 Communications* 9 (1): 1–17.
- 1814 Gaidatzis, Dimos, Lukas Burger, Maria Florescu, and Michael B. Stadler. 2016. "Erratum:  
1815 Analysis of Intronic and Exonic Reads in RNA-Seq Data Characterizes Transcriptional  
1816 and Post-Transcriptional Regulation." *Nature Biotechnology* 34 (2): 210.
- 1817 Gatto, Laurent, Lisa M. Breckels, and Kathryn S. Lilley. 2019. "Assessing Sub-Cellular  
1818 Resolution in Spatial Proteomics Experiments." *Current Opinion in Chemical Biology* 48  
1819 (February): 123–49.
- 1820 Geladaki, Aikaterini, Nina Kočevár Britovšek, Lisa M. Breckels, Tom S. Smith, Owen L.  
1821 Vennard, Claire M. Mulvey, Oliver M. Crook, Laurent Gatto, and Kathryn S. Lilley. 2019.

- 1822 “Combining LOPIT with Differential Ultracentrifugation for High-Resolution Spatial  
1823 Proteomics.” *Nature Communications*. <https://doi.org/10.1038/s41467-018-08191-w>.
- 1824 Gerdes Gyuricza, Isabela, Joel M. Chick, Gregory R. Keele, Andrew G. Deighan, Steven C.  
1825 Munger, Ron Korstanje, Steven P. Gygi, and Gary A. Churchill. 2022. “Genome-Wide  
1826 Transcript and Protein Analysis Highlights the Role of Protein Homeostasis in the Aging  
1827 Mouse Heart.” *Genome Research* 32 (5): 838–52.
- 1828 Gkotsi, Despoina, Rana Begum, Thomas Salt, Gerassimos Lascaratos, Chris Hogg, Kai-Yin  
1829 Chau, Anthony H. V. Schapira, and Glen Jeffery. 2014. “Recharging Mitochondrial  
1830 Batteries in Old Eyes. Near Infra-Red Increases ATP.” *Experimental Eye Research* 122  
1831 (May): 50–53.
- 1832 Gonskikh, Yulia, and Norbert Polacek. 2017. “Alterations of the Translation Apparatus during  
1833 Aging and Stress Response.” *Mechanisms of Ageing and Development* 168  
1834 (December): 30–36.
- 1835 Gray, D. A., M. Tsirigotis, and J. Woulfe. 2003. “Ubiquitin, Proteasomes, and the Aging  
1836 Brain.” *Science of Aging Knowledge Environment: SAGE KE* 2003 (34).  
1837 <https://doi.org/10.1126/sageke.2003.34.re6>.
- 1838 Guillozet, Angela L., Sandra Weintraub, Deborah C. Mash, and M. Marsel Mesulam. 2003.  
1839 “Neurofibrillary Tangles, Amyloid, and Memory in Aging and Mild Cognitive Impairment.”  
1840 *Archives of Neurology* 60 (5): 729–36.
- 1841 Gyenis, Akos, Jiang Chang, Joris J. P. G. Demmers, Serena T. Bruens, Sander Barnhoorn,  
1842 Renata M. C. Brandt, Marjolein P. Baar, et al. 2023. “Genome-Wide RNA Polymerase  
1843 Stalling Shapes the Transcriptome during Aging.” *Nature Genetics* 55 (2): 268–79.
- 1844 Hansen, Malene, David C. Rubinsztein, and David W. Walker. 2018. “Autophagy as a  
1845 Promoter of Longevity: Insights from Model Organisms.” *Nature Reviews. Molecular Cell  
1846 Biology* 19 (9): 579–93.
- 1847 Harel, Itamar, Yiwen R. Chen, Inbal Ziv, Param Priya Singh, Paloma Navarro Negredo, Uri  
1848 Goshtchevsky, Wei Wang, et al. 2022. “Identification of Protein Aggregates in the Aging  
1849 Vertebrate Brain with Prion-like and Phase Separation Properties.” *bioRxiv*.  
1850 <https://doi.org/10.1101/2022.02.26.482115>.
- 1851 Heiby, Julia C., and Alessandro Ori. 2022. “Organelle Dysfunction and Its Contribution to  
1852 Metabolic Impairments in Aging and Age-Related Diseases.” *Current Opinion in  
1853 Systems Biology* 30 (June): 100416.
- 1854 Higgins, René, Joshua M. Gendron, Lisa Rising, Raymond Mak, Kristofor Webb, Stephen  
1855 E. Kaiser, Nathan Zuzow, et al. 2015. “The Unfolded Protein Response Triggers Site-  
1856 Specific Regulatory Ubiquitylation of 40S Ribosomal Proteins.” *Molecular Cell* 59 (1):  
1857 35–49.
- 1858 Hipp, Mark S., Prasad Kasturi, and F. Ulrich Hartl. 2019. “The Proteostasis Network and Its  
1859 Decline in Ageing.” *Nature Reviews. Molecular Cell Biology* 20 (7): 421–35.
- 1860 Ingram, Thomas, and Lisa Chakrabarti. 2016. “Proteomic Profiling of Mitochondria: What  
1861 Does It Tell Us about the Ageing Brain?” *Aging* 8 (12): 3161–79.
- 1862 Iordanov, M. S., D. Pribnow, J. L. Magun, T. H. Dinh, J. A. Pearson, S. L. Chen, and B. E.  
1863 Magun. 1997. “Ribotoxic Stress Response: Activation of the Stress-Activated Protein  
1864 Kinase JNK1 by Inhibitors of the Peptidyl Transferase Reaction and by Sequence-  
1865 Specific RNA Damage to the Alpha-Sarcin/ricin Loop in the 28S rRNA.” *Molecular and  
1866 Cellular Biology* 17 (6): 3373–81.
- 1867 Janssens, Georges E., Anne C. Meinema, Javier González, Justina C. Wolters, Alexander  
1868 Schmidt, Victor Guryev, Rainer Bischoff, Ernst C. Wit, Liesbeth M. Veenhoff, and  
1869 Matthias Heinemann. 2015. “Protein Biogenesis Machinery Is a Driver of Replicative  
1870 Aging in Yeast.” *eLife* 4 (December): e08527.
- 1871 Johnson, J. L., T. M. Yaron, E. M. Huntsman, A. Kerelsky, J. Song, A. Regev, T. Y. Lin, et al.  
1872 2023. “An Atlas of Substrate Specificities for the Human Serine/threonine Kinome.”  
1873 *Nature* 613 (7945). <https://doi.org/10.1038/s41586-022-05575-3>.
- 1874 Kelmer Sacramento, Erika, Joanna M. Kirkpatrick, Mariateresa Mazzetto, Mario Baumgart,  
1875 Aleksandar Bartolome, Simone Di Sanzo, Cinzia Caterino, et al. 2020. “Reduced  
1876 Proteasome Activity in the Aging Brain Results in Ribosome Stoichiometry Loss and

- 1877 Aggregation." *Molecular Systems Biology* 16 (6): e9596.
- 1878 Khajuria, Rajiv K., Mathias Munschauer, Jacob C. Ulirsch, Claudia Fiorini, Leif S. Ludwig,  
1879 Sean K. McFarland, Nour J. Abdulhay, et al. 2018. "Ribosome Levels Selectively  
1880 Regulate Translation and Lineage Commitment in Human Hematopoiesis." *Cell* 173 (1):  
1881 90–103.e19.
- 1882 Kluever, Verena, Belisa Russo, Sunit Mandad, Nisha Hemandhar Kumar, Mihai Alevra,  
1883 Alessandro Ori, Silvio O. Rizzoli, Henning Urlaub, Anja Schneider, and Eugenio F.  
1884 Fornasiero. 2022. "Protein Lifetimes in Aged Brains Reveal a Proteostatic Adaptation  
1885 Linking Physiological Aging to Neurodegeneration." *Science Advances* 8 (20):  
1886 eabn4437.
- 1887 Koyuncu, Seda, Rute Loureiro, Hyun Ju Lee, Prerana Wagle, Marcus Krueger, and David  
1888 Vilchez. 2021. "Rewiring of the Ubiquitinated Proteome Determines Ageing in *C.*  
1889 *Elegans*." *Nature* 596 (7871): 285–90.
- 1890 Labbadia, J., and R. I. Morimoto. 2015. "The Biology of Proteostasis in Aging and Disease."  
1891 *Annual Review of Biochemistry*.  
1892 <https://www.annualreviews.org/doi/abs/10.1146/annurev-biochem-060614-033955>.
- 1893 Labbadia, Johnathan, and Richard I. Morimoto. 2015. "Repression of the Heat Shock  
1894 Response Is a Programmed Event at the Onset of Reproduction." *Molecular Cell* 59 (4):  
1895 639–50.
- 1896 Langmead, Ben, Cole Trapnell, Mihai Pop, and Steven L. Salzberg. 2009. "Ultrafast and  
1897 Memory-Efficient Alignment of Short DNA Sequences to the Human Genome." *Genome*  
1898 *Biology* 10 (3): R25.
- 1899 Lauria, Fabio, Toma Tebaldi, Paola Bernabò, Ewout J. N. Groen, Thomas H. Gillingwater,  
1900 and Gabriella Viero. 2018. "riboWaltz: Optimization of Ribosome P-Site Positioning in  
1901 Ribosome Profiling Data." *PLoS Computational Biology* 14 (8): e1006169.
- 1902 Liao, Yang, Gordon K. Smyth, and Wei Shi. 2013. "featureCounts: An Efficient General  
1903 Purpose Program for Assigning Sequence Reads to Genomic Features." *Bioinformatics*  
1904 30 (7): 923–30.
- 1905 Li, Longfei, Yanli Jiang, Jian-Zhi Wang, Rong Liu, and Xiaochuan Wang. 2022. "Tau  
1906 Ubiquitination in Alzheimer's Disease." *Frontiers in Neurology* 12 (February).  
1907 <https://doi.org/10.3389/fneur.2021.786353>.
- 1908 Li, S., Z. Wu, I. Tantray, Y. Li, S. Chen, J. Dong, S. Glynn, H. Vogel, M. Snyder, and B. Lu.  
1909 2020. "Quality-Control Mechanisms Targeting Translationally Stalled and C-Terminally  
1910 Extended poly(GR) Associated with ALS/FTD." *Proceedings of the National Academy of*  
1911 *Sciences of the United States of America* 117 (40).  
1912 <https://doi.org/10.1073/pnas.2005506117>.
- 1913 López-Otín, Carlos, Maria A. Blasco, Linda Partridge, Manuel Serrano, and Guido Kroemer.  
1914 2023. "Hallmarks of Aging: An Expanding Universe." *Cell* 186 (2): 243–78.
- 1915 Louka, A., S. Bagnoli, J. Rupert, B. Esapa, G. G. Tartaglia, A. Cellerino, A. Pastore, and  
1916 Tozzini E. Terzibasi. 2022. "New Lessons on TDP-43 from Old *N. Furzeri* Killifish."  
1917 *Aging Cell* 21 (1). <https://doi.org/10.1111/accel.13517>.
- 1918 Love, Michael I., Wolfgang Huber, and Simon Anders. 2014. "Moderated Estimation of Fold  
1919 Change and Dispersion for RNA-Seq Data with DESeq2." *Genome Biology* 15 (12):  
1920 550.
- 1921 Martin, Marcel. 2011. "Cutadapt Removes Adapter Sequences from High-Throughput  
1922 Sequencing Reads." *EMBnet.journal* 17 (1): 10.
- 1923 Matsui, Hideaki, Naoya Kenmochi, and Kazuhiko Namikawa. 2019. "Age- and  $\alpha$ -Synuclein-  
1924 Dependent Degeneration of Dopamine and Noradrenaline Neurons in the Annual  
1925 Killifish *Nothobranchius Furzeri*." *Cell Reports* 26 (7): 1727–33.e6.
- 1926 McGlincy, Nicholas J., and Nicholas T. Ingolia. 2017. "Transcriptome-Wide Measurement of  
1927 Translation by Ribosome Profiling." *Methods* 126 (August): 112–29.
- 1928 Meyer, Cindy, Aitor Garzia, Pavel Morozov, Henrik Molina, and Thomas Tuschl. 2020. "The  
1929 G3BP1-Family-USP10 Deubiquitinase Complex Rescues Ubiquitinated 40S Subunits of  
1930 Ribosomes Stalled in Translation from Lysosomal Degradation." *Molecular Cell* 77 (6):  
1931 1193–1205.e5.

- 1932 Mills, Eric W., and Rachel Green. 2017. "Ribosomopathies: There's Strength in Numbers."  
1933 *Science* 358 (6363). <https://doi.org/10.1126/science.aan2755>.
- 1934 Miyoshi, Noriyuki, Hammou Oubrahim, P. Boon Chock, and Earl R. Stadtman. 2006. "Age-  
1935 Dependent Cell Death and the Role of ATP in Hydrogen Peroxide-Induced Apoptosis  
1936 and Necrosis." *Proceedings of the National Academy of Sciences of the United States  
1937 of America* 103 (6): 1727–31.
- 1938 Morshed, Nader, Meelim J. Lee, Felicia H. Rodriguez, Douglas A. Lauffenburger, Diego  
1939 Mastroeni, and Forest M. White. 2021. "Quantitative Phosphoproteomics Uncovers  
1940 Dysregulated Kinase Networks in Alzheimer's Disease." *Nature Aging* 1 (6): 550–65.
- 1941 Noderer, William L., Ross J. Flockhart, Aparna Bhaduri, Alexander J. Diaz de Arce, Jiajing  
1942 Zhang, Paul A. Khavari, and Clifford L. Wang. 2014. "Quantitative Analysis of  
1943 Mammalian Translation Initiation Sites by FACS-Seq." *Molecular Systems Biology* 10  
1944 (8): 748.
- 1945 Ori, Alessandro, Brandon H. Toyama, Michael S. Harris, Thomas Bock, Murat Iskar, Peer  
1946 Bork, Nicholas T. Ingolia, Martin W. Hetzer, and Martin Beck. 2015. "Integrated  
1947 Transcriptome and Proteome Analyses Reveal Organ-Specific Proteome Deterioration  
1948 in Old Rats." *Cell Systems* 1 (3): 224–37.
- 1949 Pagliarini, David J., Sarah E. Calvo, Betty Chang, Sunil A. Sheth, Scott B. Vafai, Shao-En  
1950 Ong, Geoffrey A. Walford, et al. 2008. "A Mitochondrial Protein Compendium Elucidates  
1951 Complex I Disease Biology." *Cell* 134 (1): 112–23.
- 1952 Putri, Givanna H., Simon Anders, Paul Theodor Pyl, John E. Pimanda, and Fabio Zanini.  
1953 2022. "Analysing High-Throughput Sequencing Data in Python with HTSeq 2.0."  
1954 *Bioinformatics* 38 (10): 2943–45.
- 1955 Quinlan, Aaron R., and Ira M. Hall. 2010. "BEDTools: A Flexible Suite of Utilities for  
1956 Comparing Genomic Features." *Bioinformatics* 26 (6): 841–42.
- 1957 Rimal, S., Y. Li, R. Vartak, J. Geng, I. Tantray, S. Li, S. Huh, et al. 2021. "Inefficient Quality  
1958 Control of Ribosome Stalling during APP Synthesis Generates CAT-Tailed Species That  
1959 Precipitate Hallmarks of Alzheimer's Disease." *Acta Neuropathologica Communications*  
1960 9 (1). <https://doi.org/10.1186/s40478-021-01268-6>.
- 1961 Ritchie, Matthew E., Belinda Phipson, Di Wu, Yifang Hu, Charity W. Law, Wei Shi, and  
1962 Gordon K. Smyth. 2015. "Limma Powers Differential Expression Analyses for RNA-  
1963 Sequencing and Microarray Studies." *Nucleic Acids Research* 43 (7): e47.
- 1964 Safaiyan, Shima, Nirmal Kannaiyan, Nicolas Snaidero, Simone Brioschi, Knut Biber, Simon  
1965 Yona, Aimee L. Edinger, Steffen Jung, Moritz J. Rossner, and Mikael Simons. 2016.  
1966 "Age-Related Myelin Degradation Burdens the Clearance Function of Microglia during  
1967 Aging." *Nature Neuroscience* 19 (8): 995–98.
- 1968 Schumacher, Björn, Joris Pothof, Jan Vijg, and Jan H. J. Hoeijmakers. 2021. "The Central  
1969 Role of DNA Damage in the Ageing Process." *Nature* 592 (7856): 695–703.
- 1970 Schwartz, D. C., and R. Parker. 2000. "mRNA Decapping in Yeast Requires Dissociation of  
1971 the Cap Binding Protein, Eukaryotic Translation Initiation Factor 4E." *Molecular and  
1972 Cellular Biology* 20 (21): 7933–42.
- 1973 Sharma, Ajeet K., Johannes Venezian, Ayala Shiber, Günter Kramer, Bernd Bukau, and  
1974 Edward P. O'Brien. 2021. "Combinations of Slow-Translating Codon Clusters Can  
1975 Increase mRNA Half-Life in." *Proceedings of the National Academy of Sciences of the  
1976 United States of America* 118 (51). <https://doi.org/10.1073/pnas.2026362118>.
- 1977 Silva, Pedro Tomaz da, Yujie Zhang, Evangelos Theodorakis, Laura D. Martens, Vicente A.  
1978 Yépez, Vicent Pelechano, and Julien Gagneur. 2023. "Cellular Energy Regulates mRNA  
1979 Translation and Degradation in a Codon-Specific Manner." *bioRxiv*.  
1980 <https://doi.org/10.1101/2023.04.06.535836>.
- 1981 Smith, Tom, Andreas Heger, and Ian Sudbery. 2017. "UMI-Tools: Modeling Sequencing  
1982 Errors in Unique Molecular Identifiers to Improve Quantification Accuracy." *Genome  
1983 Research* 27 (3): 491–99.
- 1984 Stagi, Massimiliano, Zoe A. Klein, Travis J. Gould, Joerg Bewersdorf, and Stephen M.  
1985 Strittmatter. 2014. "Lysosome Size, Motility and Stress Response Regulated by Fronto-  
1986 Temporal Dementia Modifier TMEM106B." *Molecular and Cellular Neurosciences* 61



- 1987 (July): 226–40.
- 1988 Stein, Kevin C., Fabián Morales-Polanco, Joris van der Lienden, T. Kelly Rainbolt, and
- 1989 Judith Frydman. 2022. “Ageing Exacerbates Ribosome Pausing to Disrupt
- 1990 Cotranslational Proteostasis.” *Nature* 601 (7894): 637–42.
- 1991 Stoeger, Thomas, Rogan A. Grant, Alexandra C. McQuattie-Pimentel, Kishore R. Anekalla,
- 1992 Sophia S. Liu, Heliodoro Tejedor-Navarro, Benjamin D. Singer, et al. 2022. “Aging Is
- 1993 Associated with a Systemic Length-Associated Transcriptome Imbalance.” *Nature Aging*
- 1994 2 (12): 1191–1206.
- 1995 Strimmer, Korbinian. 2008. “Fdrtool: A Versatile R Package for Estimating Local and Tail
- 1996 Area-Based False Discovery Rates.” *Bioinformatics* 24 (12): 1461–62.
- 1997 Sudmant, Peter H., Hyeseung Lee, Daniel Dominguez, Myriam Heiman, and Christopher B.
- 1998 Burge. 2018. “Widespread Accumulation of Ribosome-Associated Isolated 3’ UTRs in
- 1999 Neuronal Cell Populations of the Aging Brain.” *Cell Reports* 25 (9): 2447–56.e4.
- 2000 Takemon, Yuka, Joel M. Chick, Isabela Gerdes Gyuricza, Daniel A. Skelly, Olivier Devuyst,
- 2001 Steven P. Gygi, Gary A. Churchill, and Ron Korstanje. 2021. “Proteomic and
- 2002 Transcriptomic Profiling Reveal Different Aspects of Aging in the Kidney.” *eLife* 10
- 2003 (March). <https://doi.org/10.7554/eLife.62585>.
- 2004 Tebbenkamp, Andrew T. N., and David R. Borchelt. 2009. “Protein Aggregate
- 2005 Characterization in Models of Neurodegenerative Disease.” *Neuroproteomics*, 85–91.
- 2006 Thomsen, Martin Christen Frølund, and Morten Nielsen. 2012. “Seq2Logo: A Method for
- 2007 Construction and Visualization of Amino Acid Binding Motifs and Sequence Profiles
- 2008 Including Sequence Weighting, Pseudo Counts and Two-Sided Representation of
- 2009 Amino Acid Enrichment and Depletion.” *Nucleic Acids Research* 40 (Web Server issue):
- 2010 W281–87.
- 2011 Tyshkovskiy, Alexander, Siming Ma, Anastasia V. Shindyapina, Stanislav Tikhonov, Sang-
- 2012 Goo Lee, Perinur Bozaykut, José P. Castro, et al. 2023. “Distinct Longevity Mechanisms
- 2013 across and within Species and Their Association with Aging.” *Cell* 186 (13): 2929–
- 2014 49.e20.
- 2015 Valenzano, Dario R., Eva Terzibasi, Antonino Cattaneo, Luciano Domenici, and Alessandro
- 2016 Cellerino. 2006. “Temperature Affects Longevity and Age-Related Locomotor and
- 2017 Cognitive Decay in the Short-Lived Fish *Nothobranchius Furzeri*.” *Aging Cell* 5 (3): 275–
- 2018 78.
- 2019 Vecchi, Giulia, Pietro Sormanni, Benedetta Mannini, Andrea Vandelli, Gian Gaetano
- 2020 Tartaglia, Christopher M. Dobson, F. Ulrich Hartl, and Michele Vendruscolo. 2020.
- 2021 “Proteome-Wide Observation of the Phenomenon of Life on the Edge of Solubility.”
- 2022 *Proceedings of the National Academy of Sciences of the United States of America* 117
- 2023 (2): 1015–20.
- 2024 Vilchez, David, Isabel Saez, and Andrew Dillin. 2014. “The Role of Protein Clearance
- 2025 Mechanisms in Organismal Ageing and Age-Related Diseases.” *Nature*
- 2026 *Communications* 5 (December): 5659.
- 2027 Walther, D. M., P. Kasturi, M. Zheng, S. Pinkert, G. Vecchi, P. Ciryam, R. I. Morimoto, et al.
- 2028 2015. “Widespread Proteome Remodeling and Aggregation in Aging *C. Elegans*.” *Cell*
- 2029 161 (4). <https://doi.org/10.1016/j.cell.2015.03.032>.
- 2030 Wang, Yipeng, and Eckhard Mandelkow. 2015. “Tau in Physiology and Pathology.” *Nature*
- 2031 *Reviews. Neuroscience* 17 (1): 22–35.
- 2032 Wei, Yu-Ning, Hai-Yang Hu, Gang-Cai Xie, Ning Fu, Zhi-Bin Ning, Rong Zeng, and Philipp
- 2033 Khaitovich. 2015. “Transcript and Protein Expression Decoupling Reveals RNA Binding
- 2034 Proteins and miRNAs as Potential Modulators of Human Aging.” *Genome Biology* 16
- 2035 (1): 41.
- 2036 Wu, Tianzhi, Erqiang Hu, Shuangbin Xu, Meijun Chen, Pingfan Guo, Zehan Dai, Tingze
- 2037 Feng, et al. 2021. “clusterProfiler 4.0: A Universal Enrichment Tool for Interpreting
- 2038 Omics Data.” *Innovation (Cambridge (Mass.))* 2 (3): 100141.
- 2039 Wu, Z., I. Tantray, J. Lim, S. Chen, Y. Li, Z. Davis, C. Sitron, et al. 2019. “MISTERMINATE
- 2040 Mechanistically Links Mitochondrial Dysfunction with Proteostasis Failure.” *Molecular*
- 2041 *Cell* 75 (4). <https://doi.org/10.1016/j.molcel.2019.06.031>.

- 2042 Ximerakis, M., S. L. Lipnick, B. T. Innes, S. K. Simmons, X. Adiconis, D. Dionne, B. A.  
2043 Mayweather, et al. 2019. "Single-Cell Transcriptomic Profiling of the Aging Mouse  
2044 Brain." *Nature Neuroscience* 22 (10). <https://doi.org/10.1038/s41593-019-0491-3>.  
2045 Yan, Liewei L., Carrie L. Simms, Fionn McLoughlin, Richard D. Vierstra, and Hani S. Zaher.  
2046 2019. "Oxidation and Alkylation Stresses Activate Ribosome-Quality Control." *Nature*  
2047 *Communications* 10 (1): 5611.  
2048 Yu, Qing, Haopeng Xiao, Mark P. Jedrychowski, Devin K. Schweppe, Jose Navarrete-Perea,  
2049 Jeffrey Knott, John Rogers, Edward T. Chouchani, and Steven P. Gygi. 2020. "Sample  
2050 Multiplexing for Targeted Pathway Proteomics in Aging Mice." *Proceedings of the*  
2051 *National Academy of Sciences of the United States of America* 117 (18): 9723–32.
- 2052

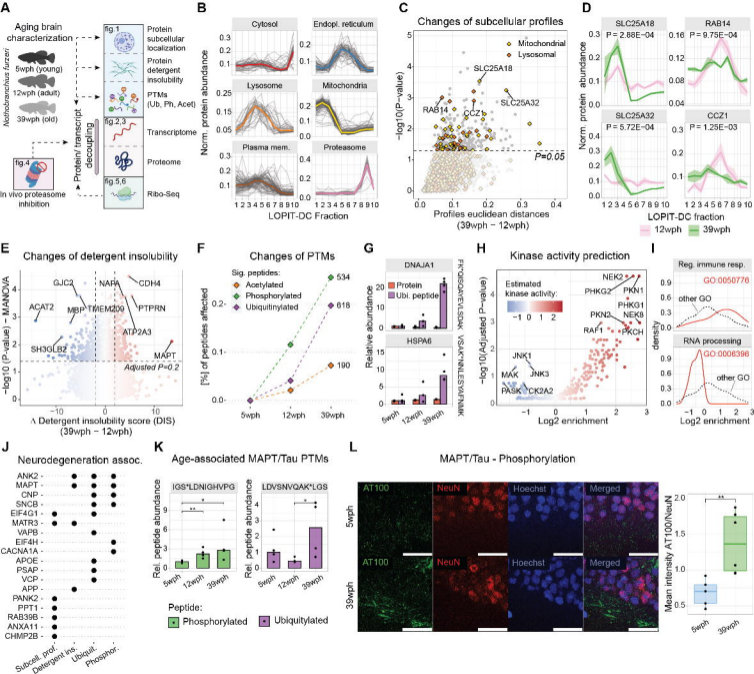

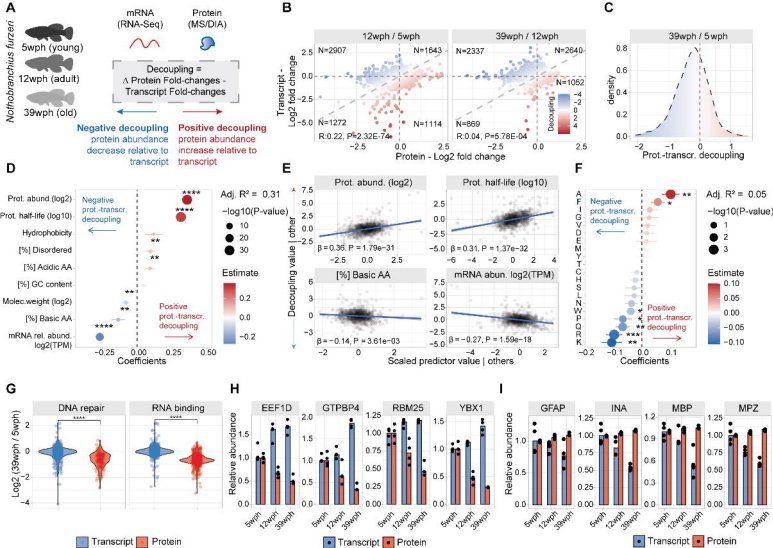

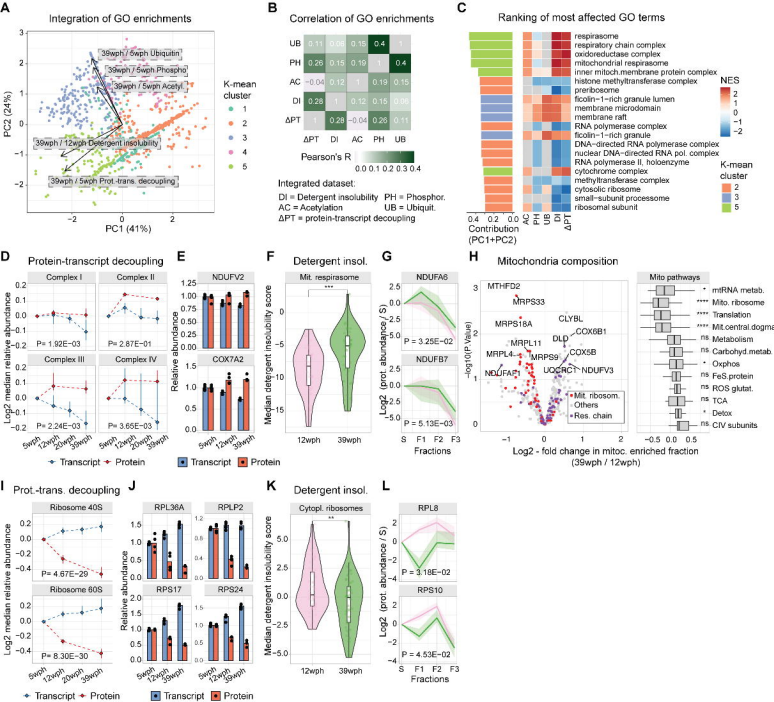

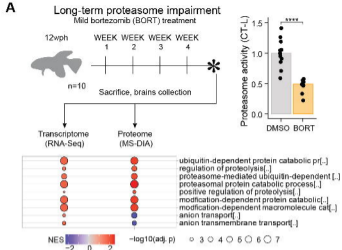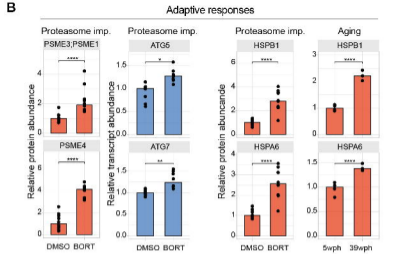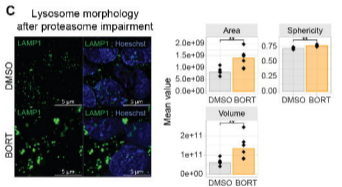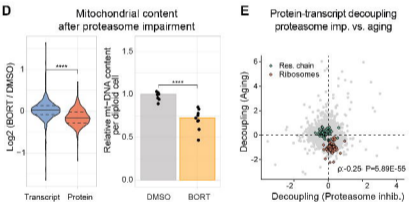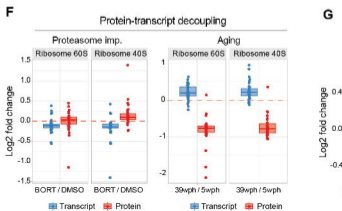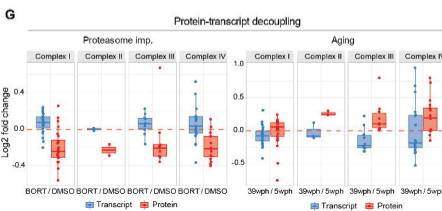

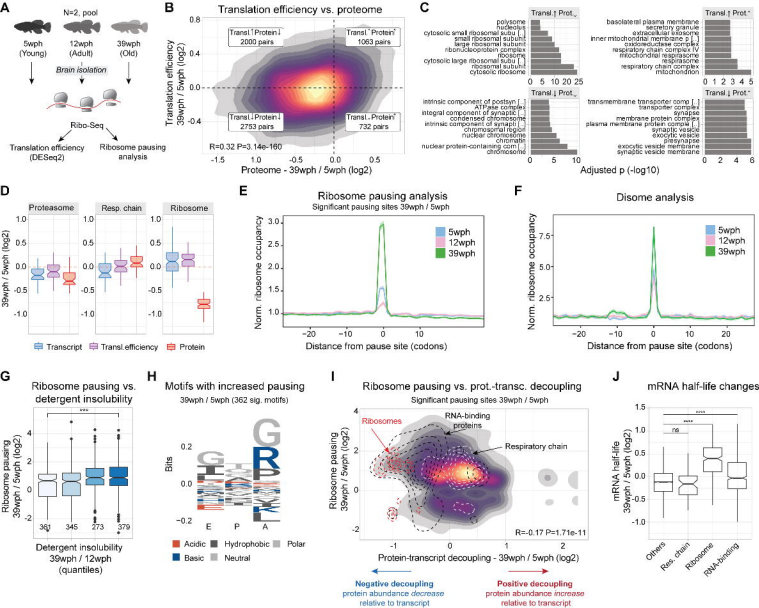

### A Predicted protein synthesis output vs. cellular ribosome concentration

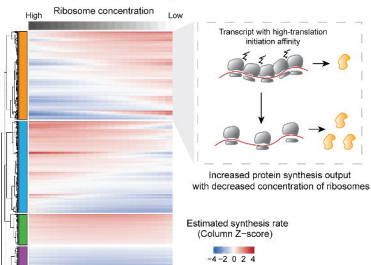

### B Comparison to experimental aging data

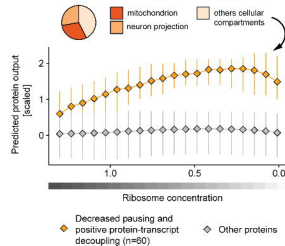

### C

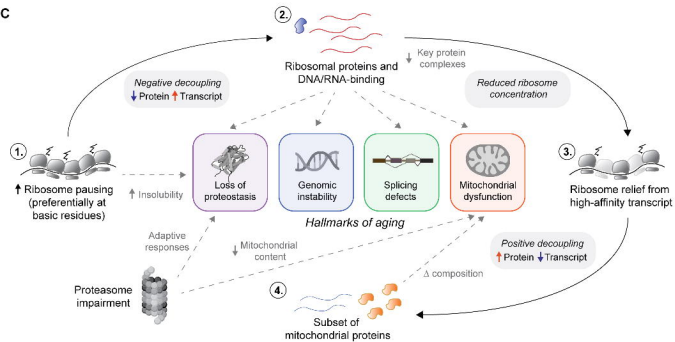



# *Nothobranchius furzeri* - brain aging

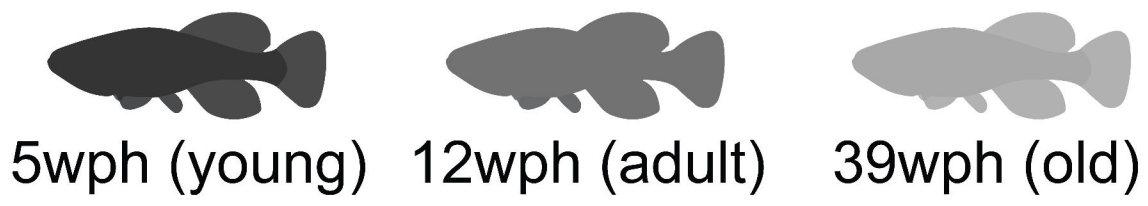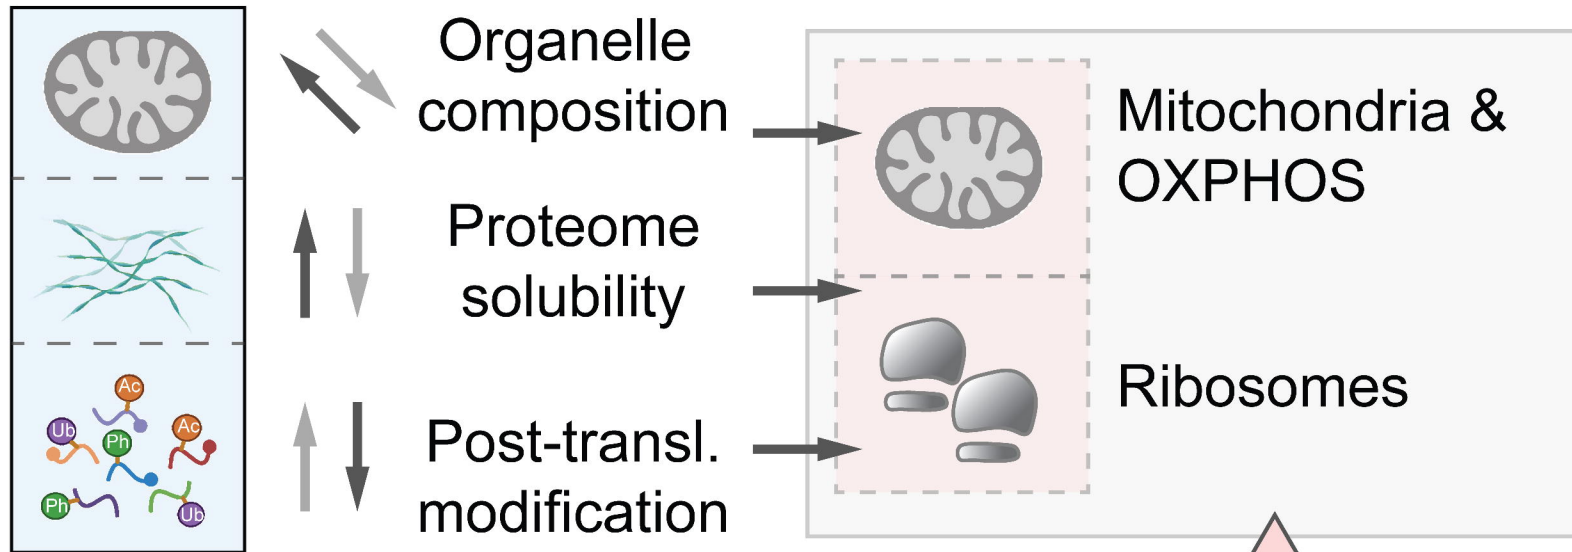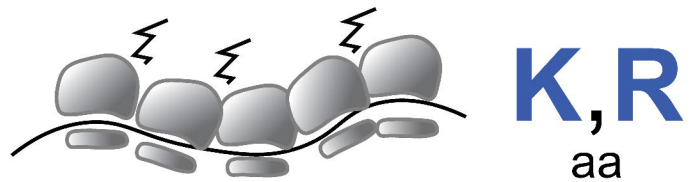

Ribosome pausing =  
Loss of basic proteins  
(Ribosomal proteins,  
RNA/DNA binding)

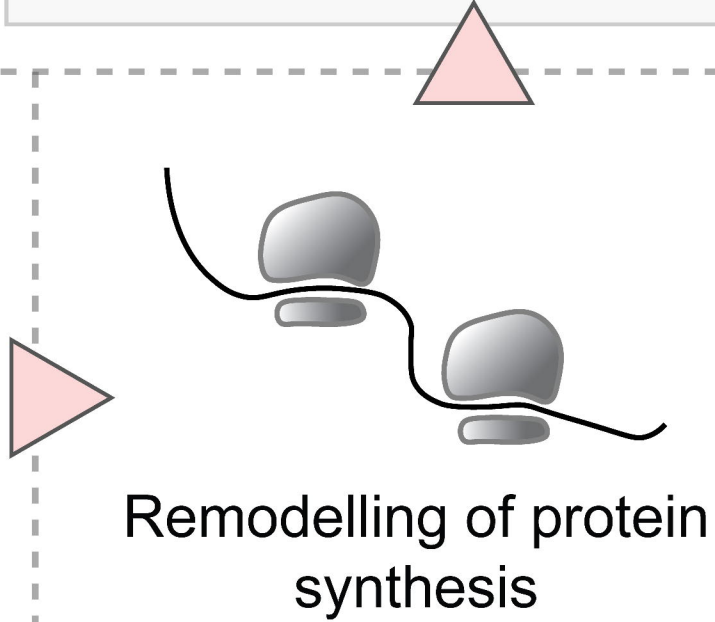

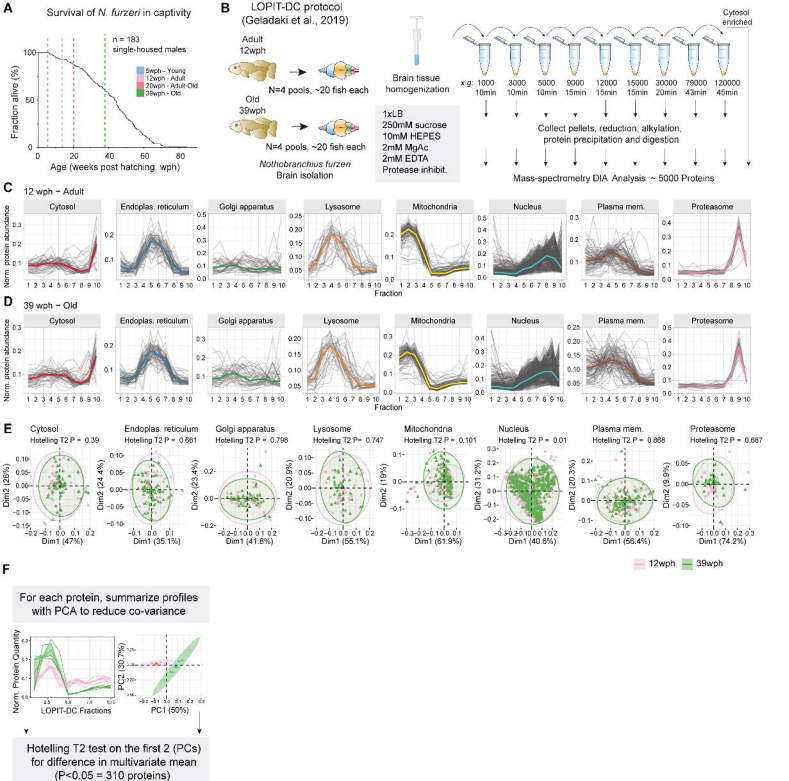

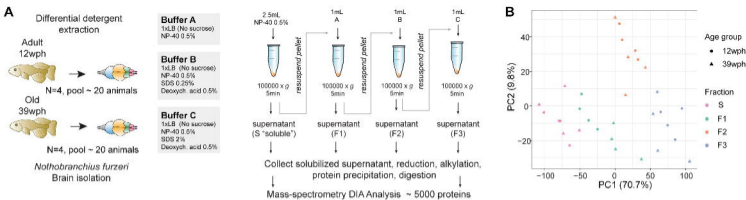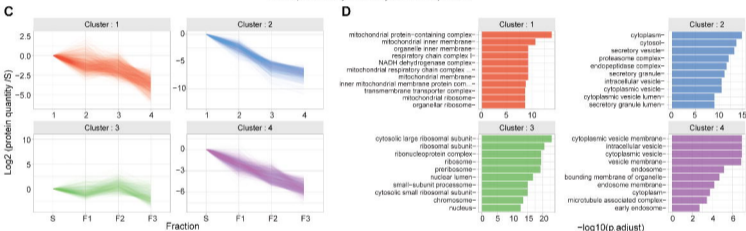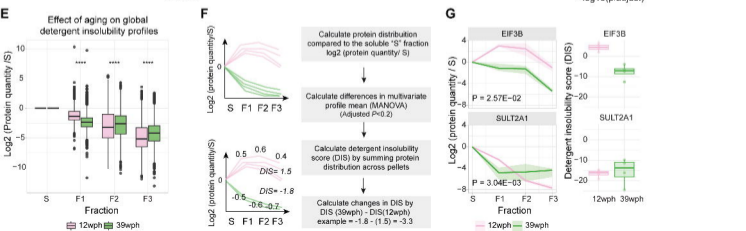

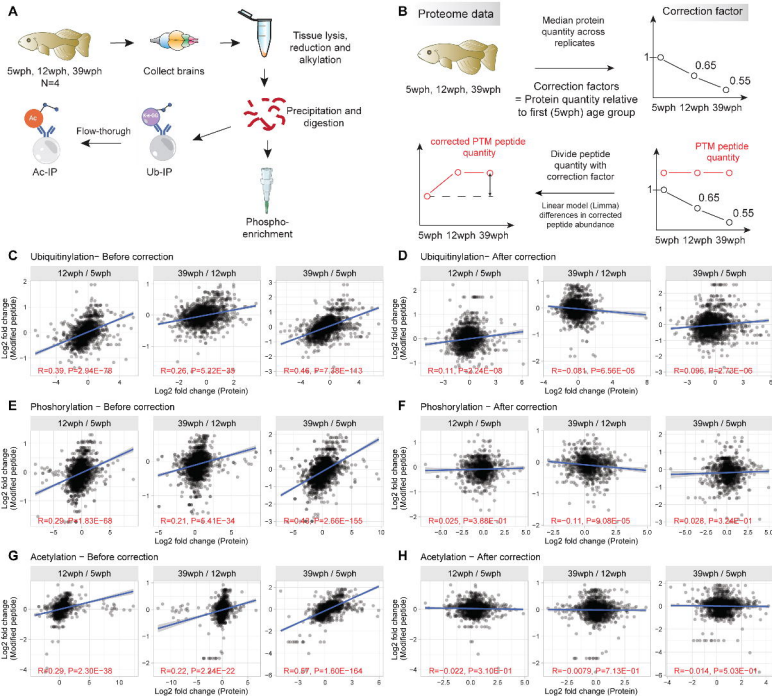

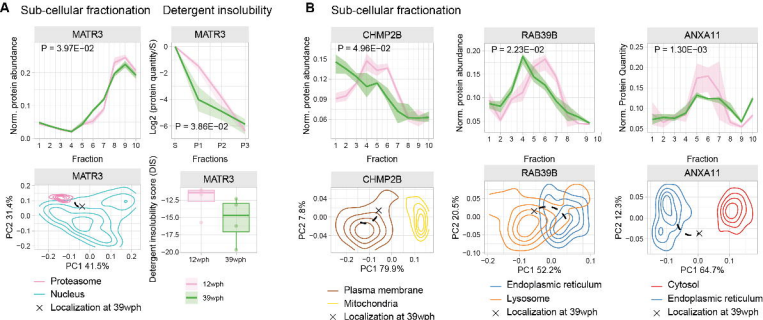

**C** Conserved modified residues  
*N. furzeri* / *H. sapiens*

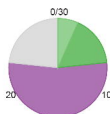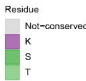

**D** MAPT - Microtubule-associated protein tau

```
ref|NP_001116539.1| PGGKGVQI INKGLDLSINMQSKDSSKNIKHMPGGSSVQIVY
Nfu_p_1_002363 PGGKGVQI LDQKLDLSINMQKLGSKNLIKHMPGGGMQI LD
80 90 100 110 120
ref|NP_001116539.1| GSVQI VYKPVDL SKVTSKCGS LGNIHKHPGGGQ
Nfu_p_1_002363 GNI E I KNEKLEF -KVQSK I G L D N I G H V P G G G Q
60 70 80
```

CACNA1A - Calcium voltage-gated channel subunit alpha A

```
ref|NP_001120694.1| EYYRDSKAKKLGAWREEDQRTPUMFRMEPP---SPTQEG--
Nfu_p_1_017108 EYYRDSKTKKLGAWREEDQRTPUMFRMEPPPEGGSTEQQV
2000 2020 2040 2060 2080 2100
```

SNCB - synuclein beta

```
ref|XP_006714977.1| TKQGS/TEAAEKTREGVLYGSKTREGVWGQ/ASVAEKTKEQ
Nfu_p_1_033889 TKEG/AVAAEKTREGM/FVSGKARD----SVGTVAEKT--
20 30 40 50 60
ref|XP_006714977.1| HLGAVFSGAGNI/AATGLVWREFFPTDLKPEEVAEE
Nfu_p_1_033889 ---GAV---GNI VAATGLVWREFFPTDINPEEYGEAMEG
70 80 90 100
```

EIF4G1 - eukaryotic translation initiation factor 4 gamma 1

```
ref|NP_886553.3| EAALPPSPYLKAAALSEELRQSKAII EYLHINDMKEAVQ
Nfu_p_1_047820 EGAPTPSPYLKATLDEEVRQSKAII EEFHINDMKEALQ
830 840 850 860
```

position in local alignment

Ubiquitylation Phosphorylation

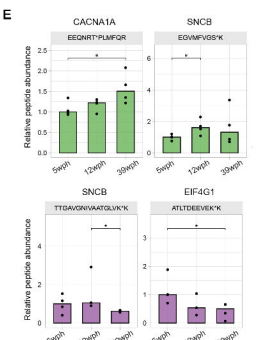

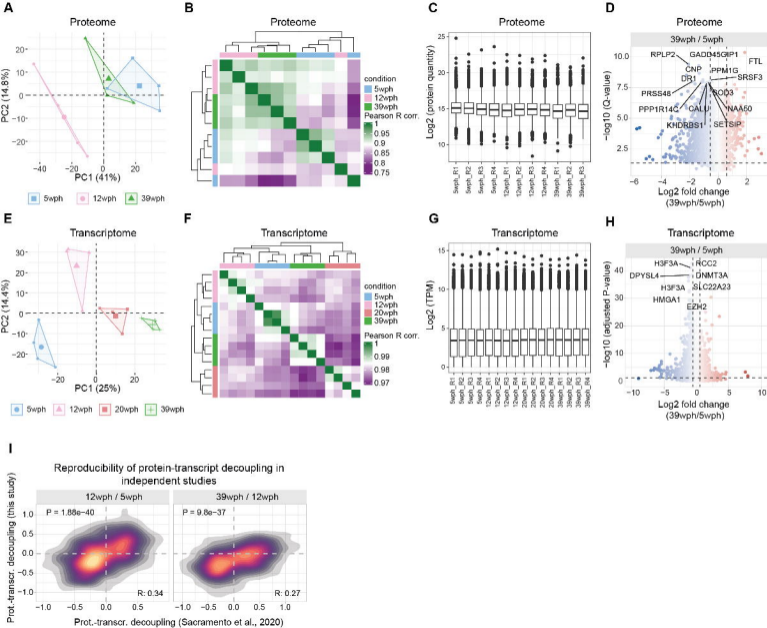

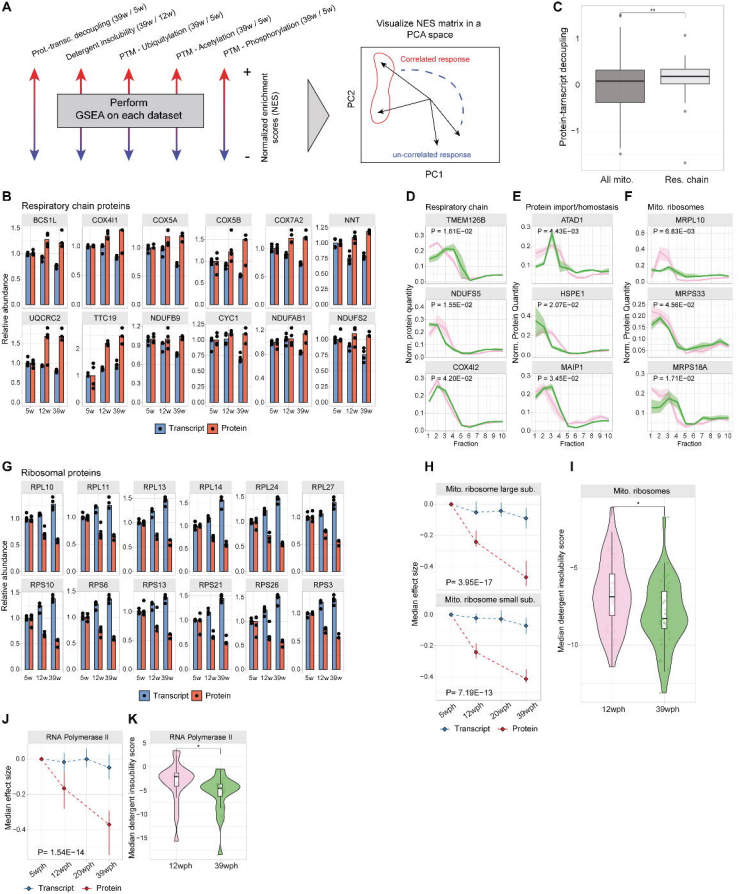

Proteostasis network after proteasome impairment

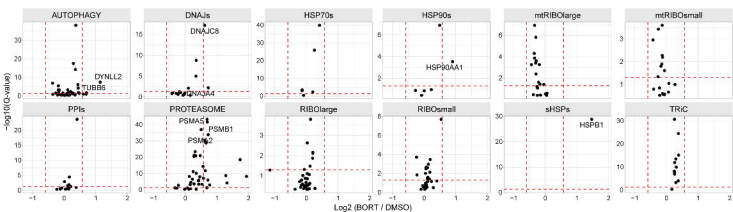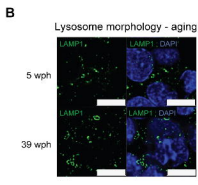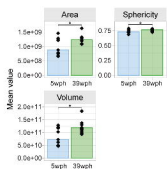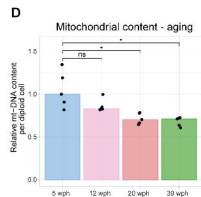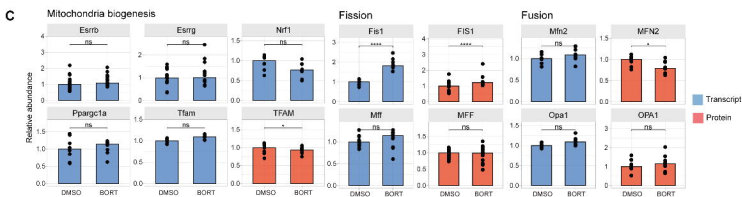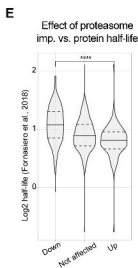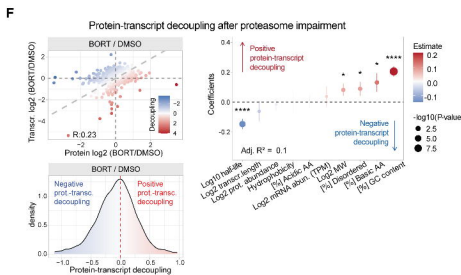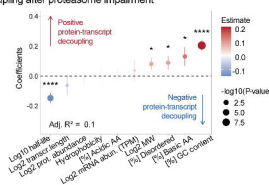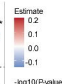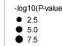



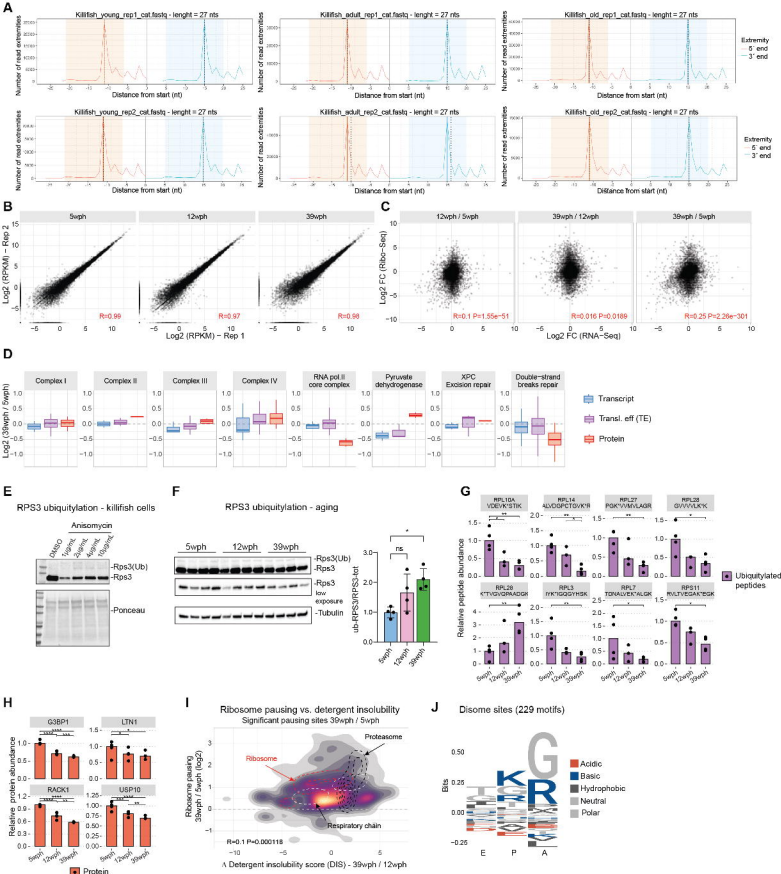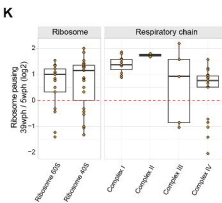

Source: https://www.biorxiv.org/content/10.1101/2023.07.20.549210v1.full.pdf
